# Supplementary material
Source: PubMed Central journal article supplement (PMC5880101)

**A**  
CID

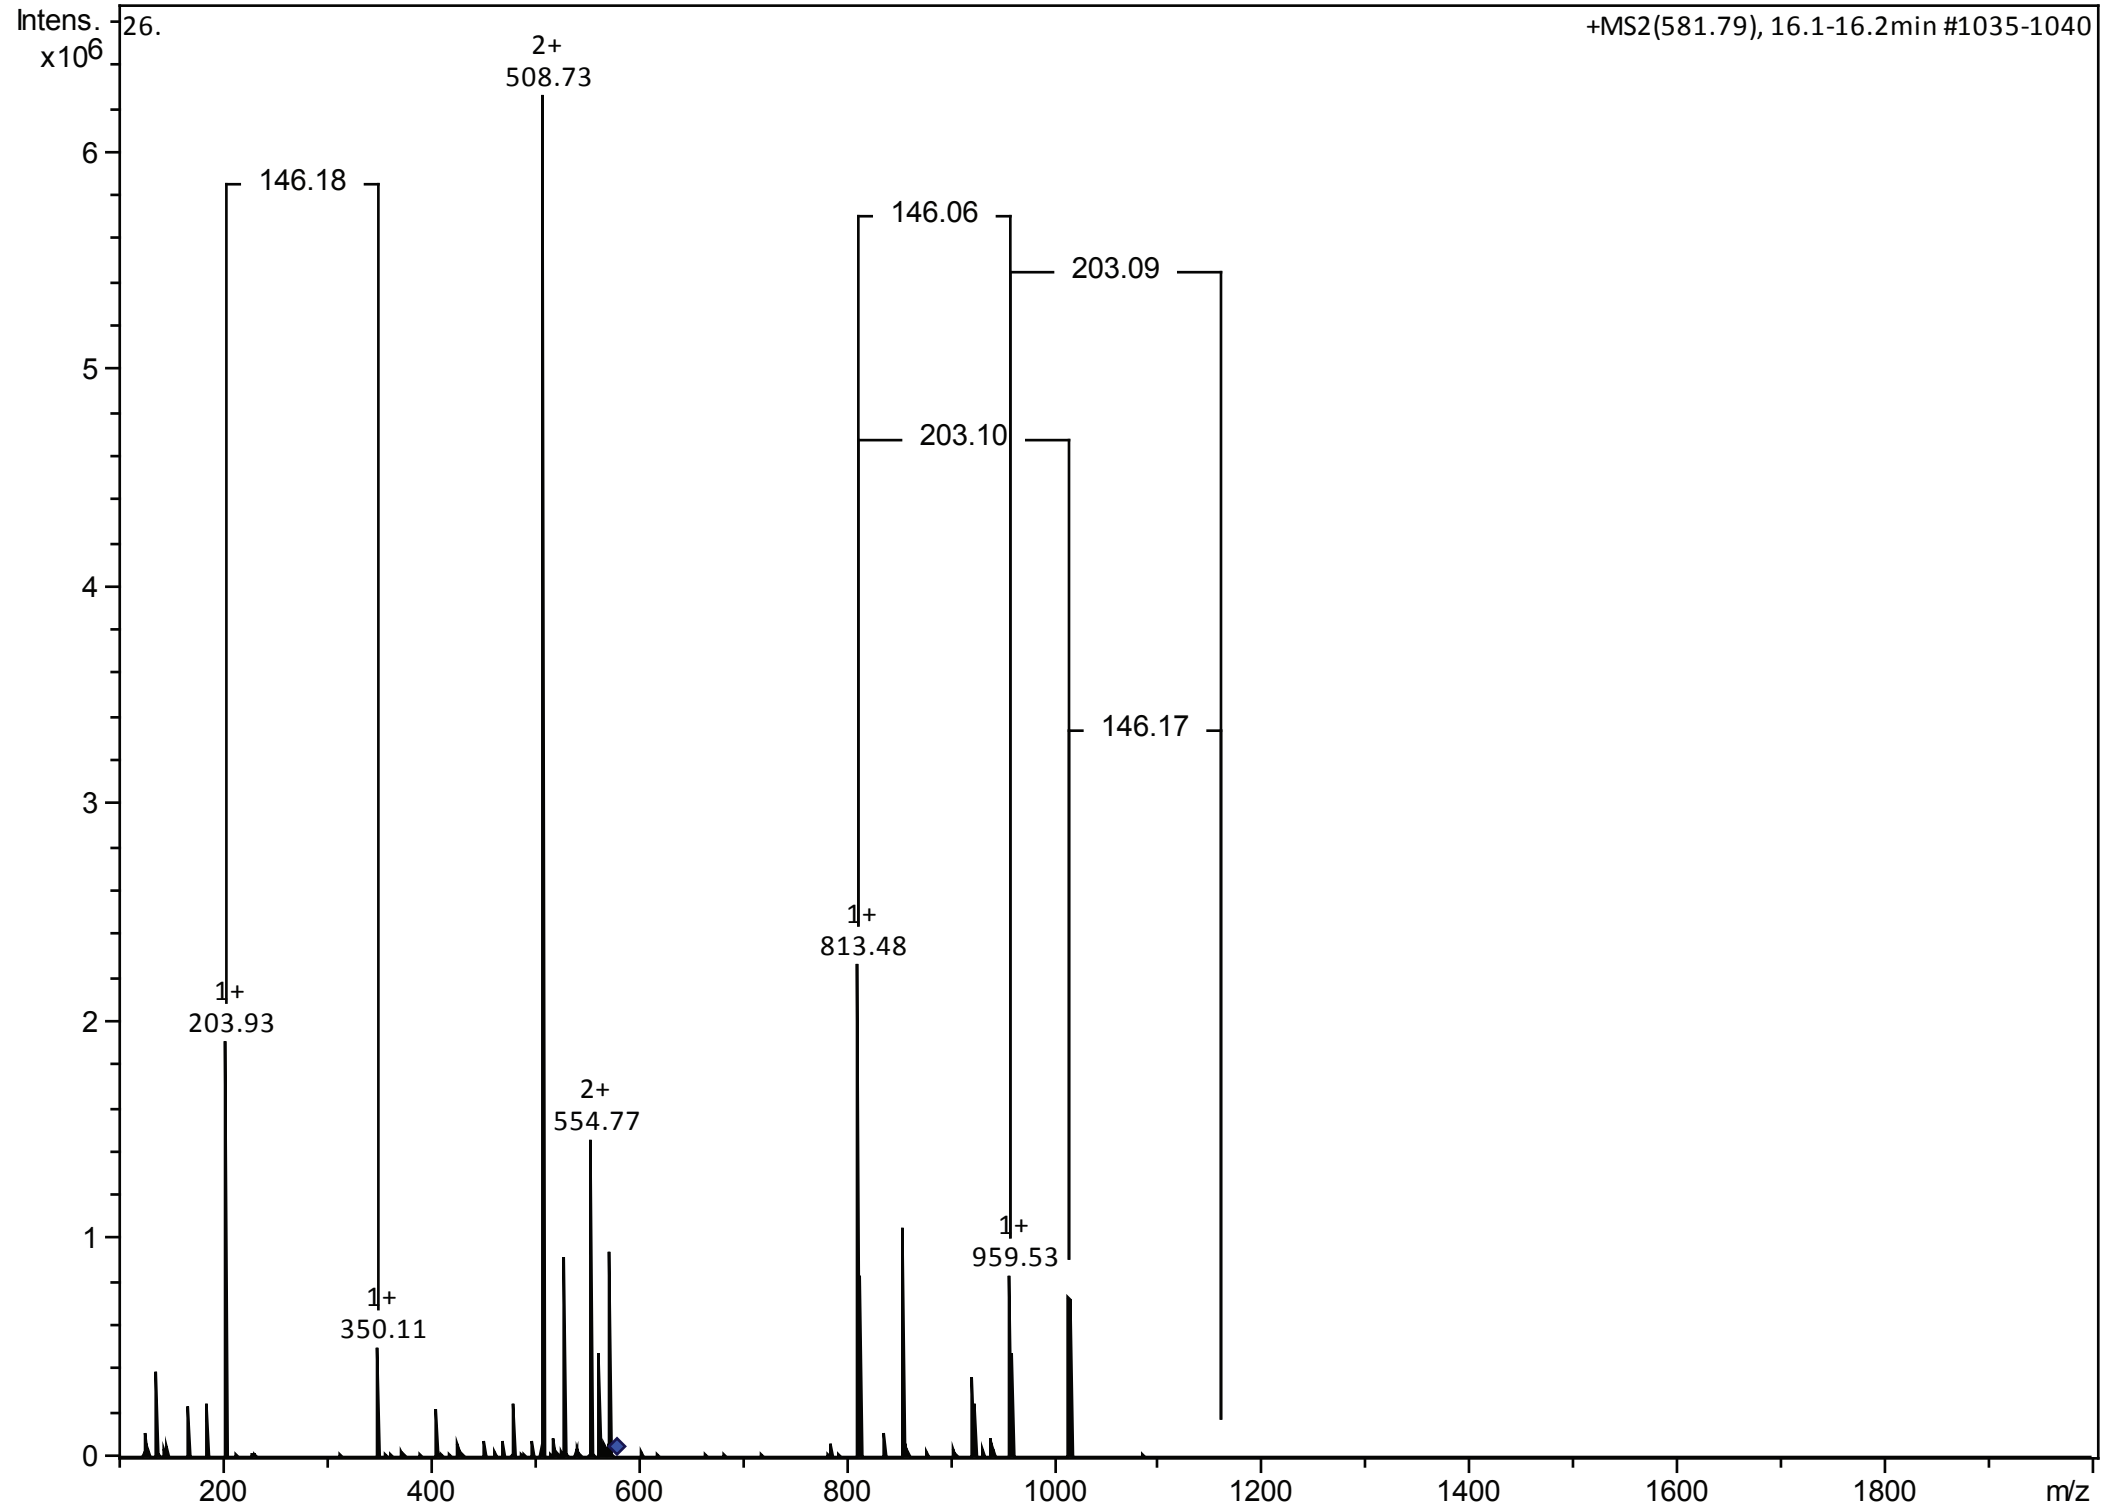

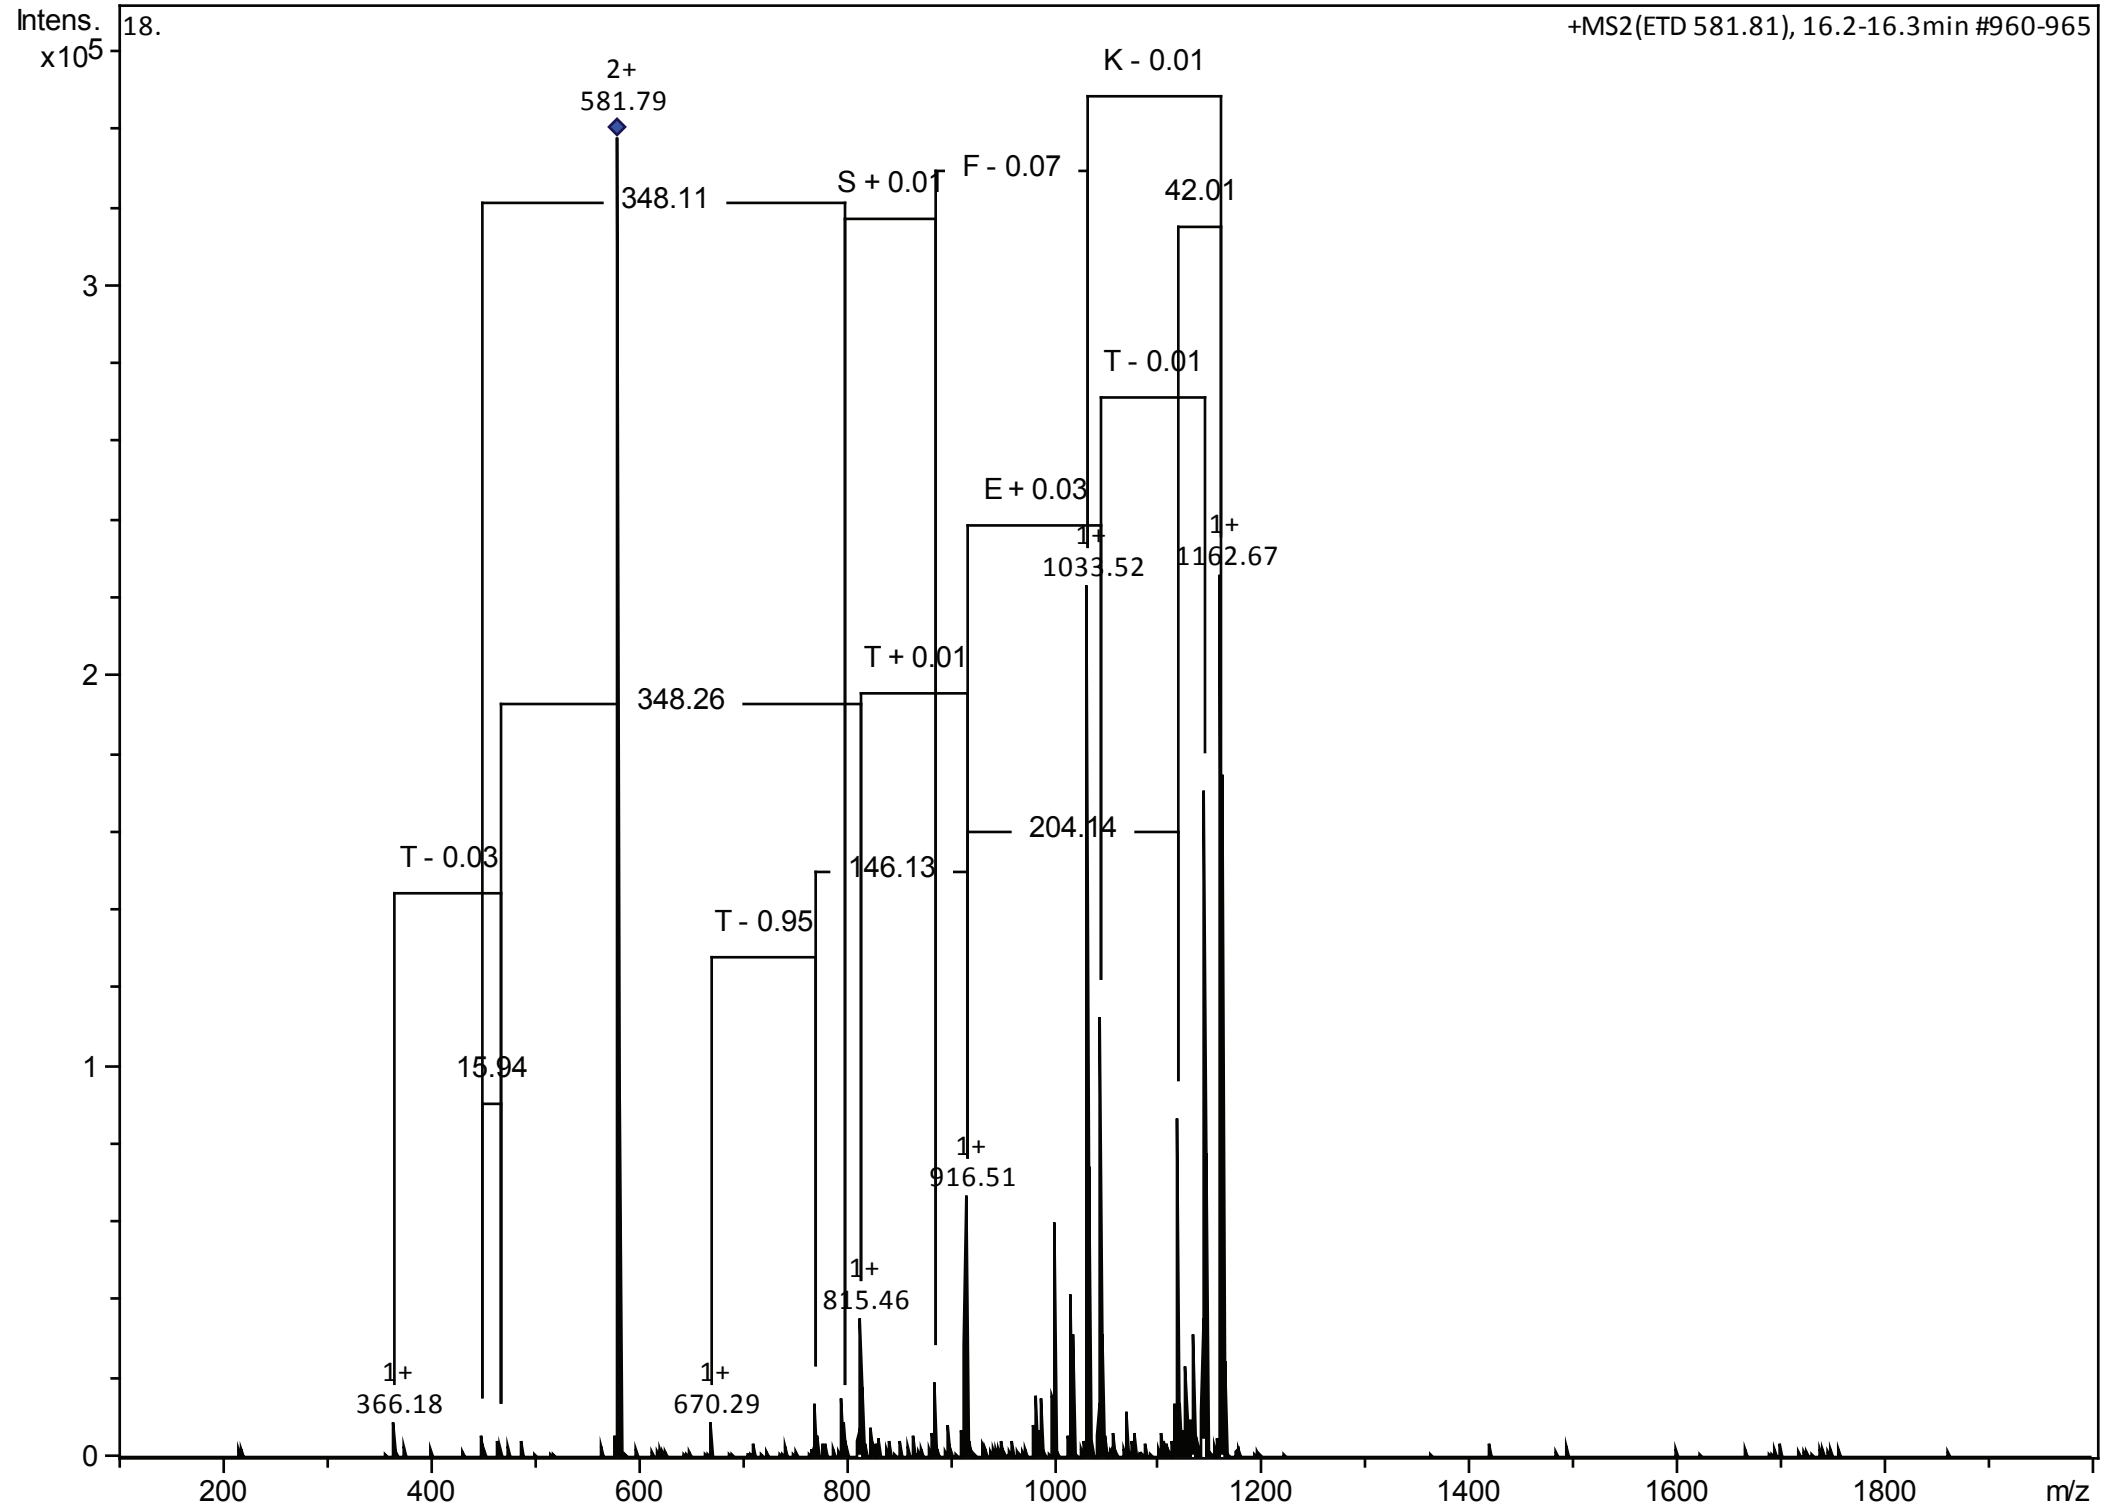

**A**  
ETD

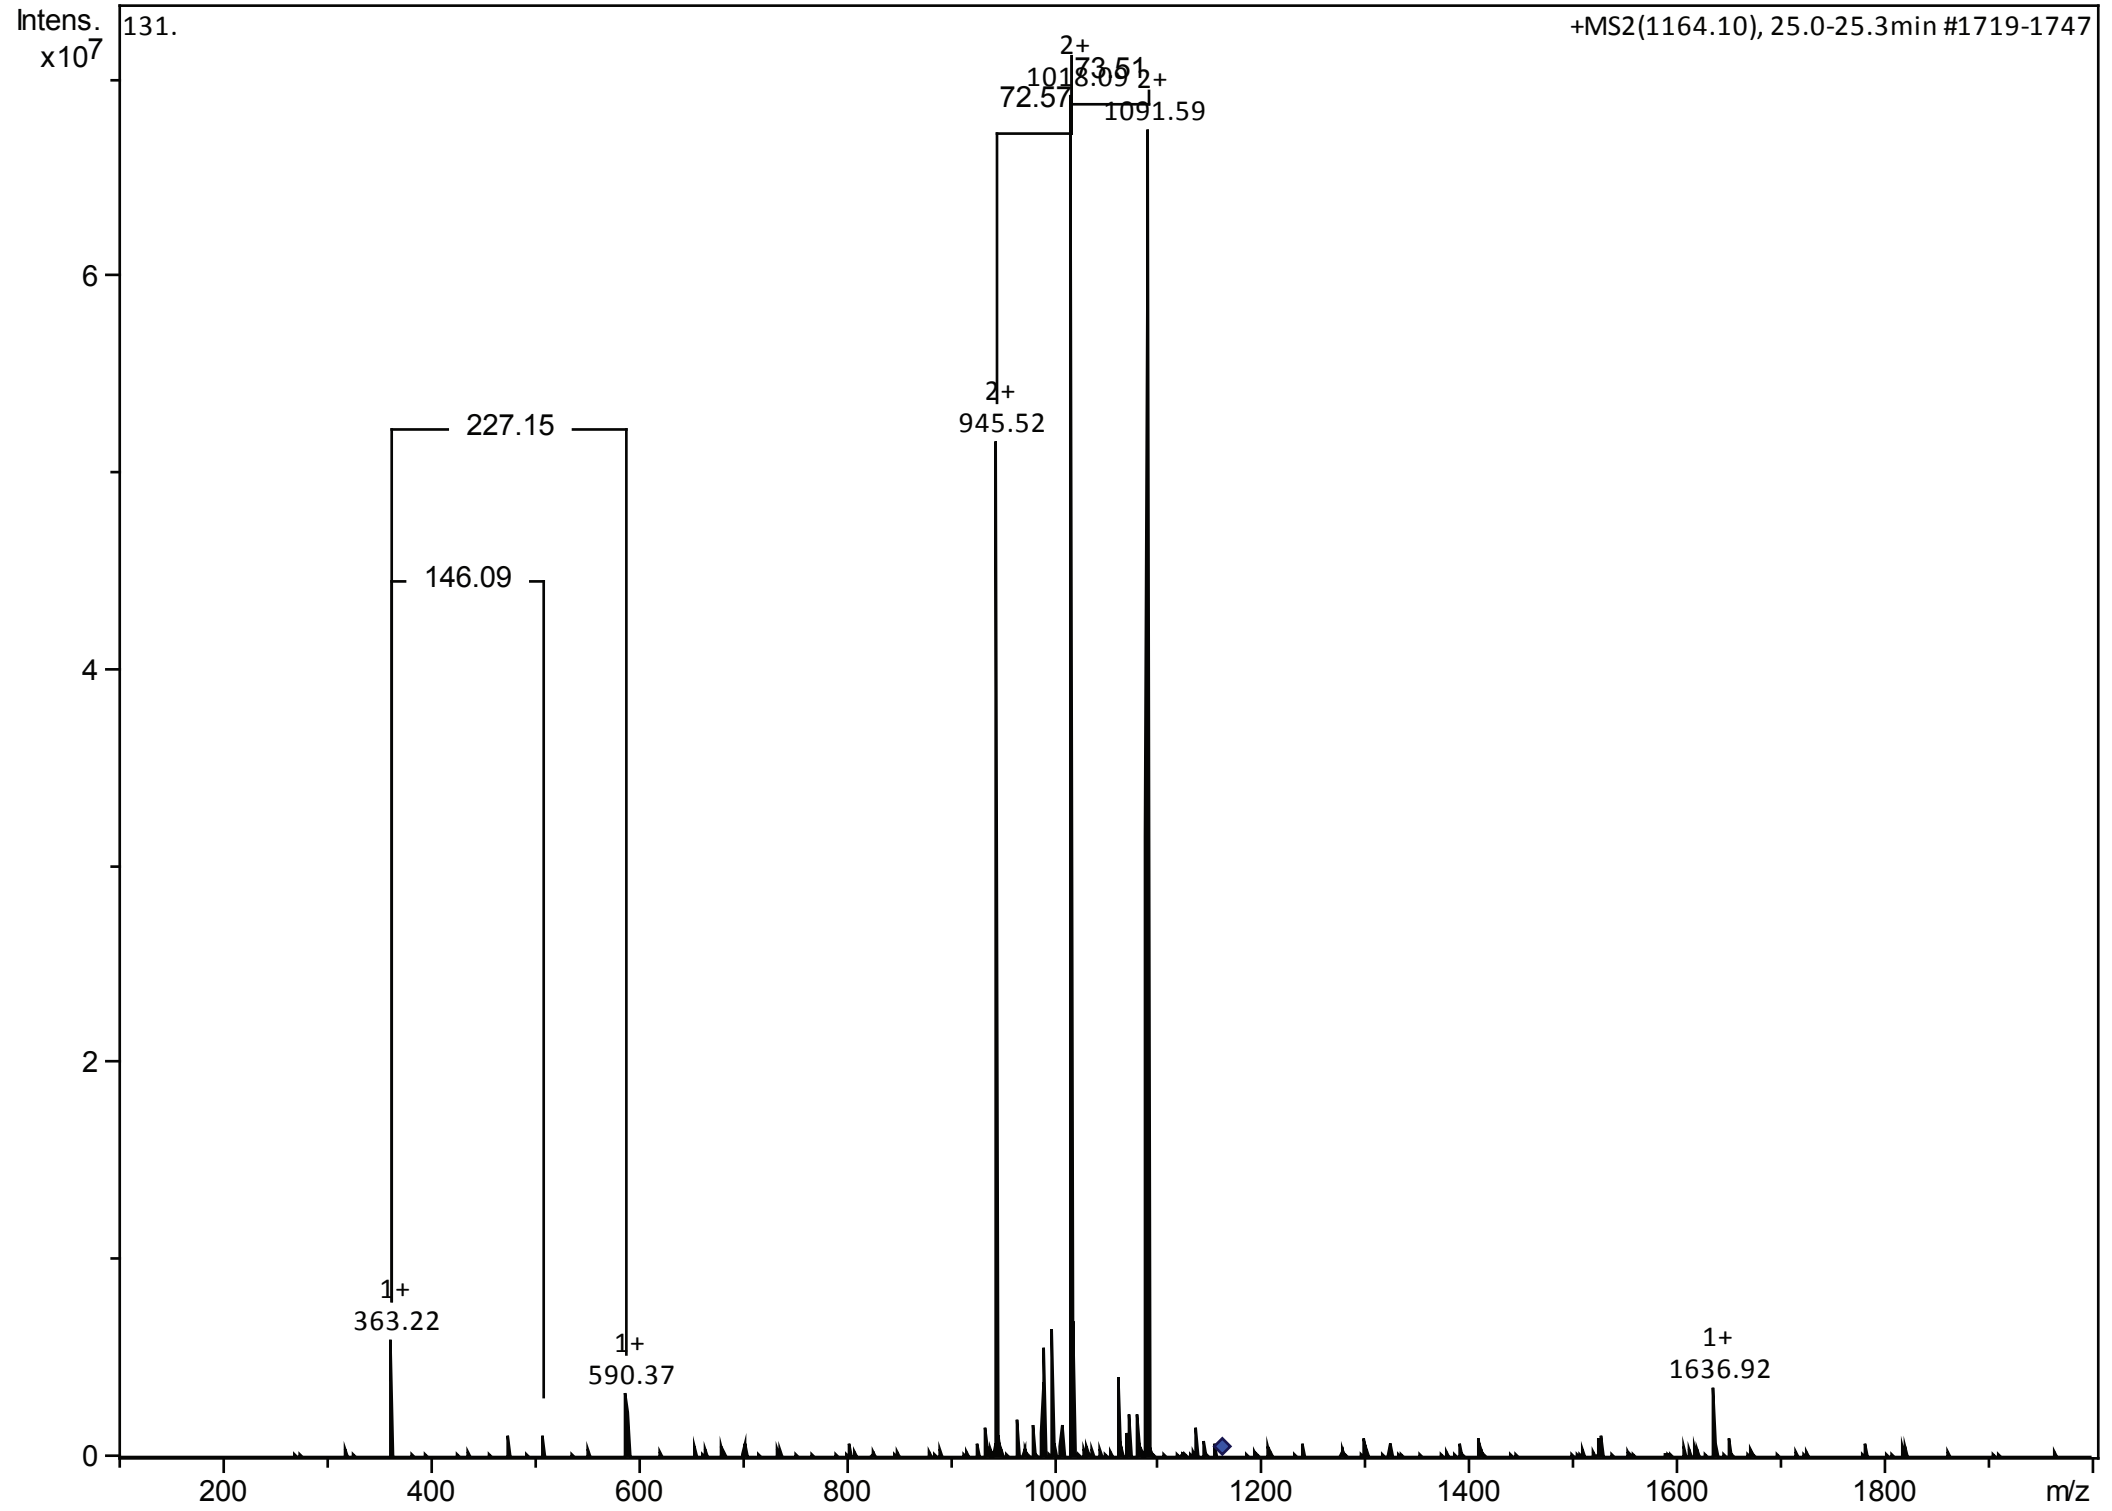

**B**  
CID

**B**  
ETD

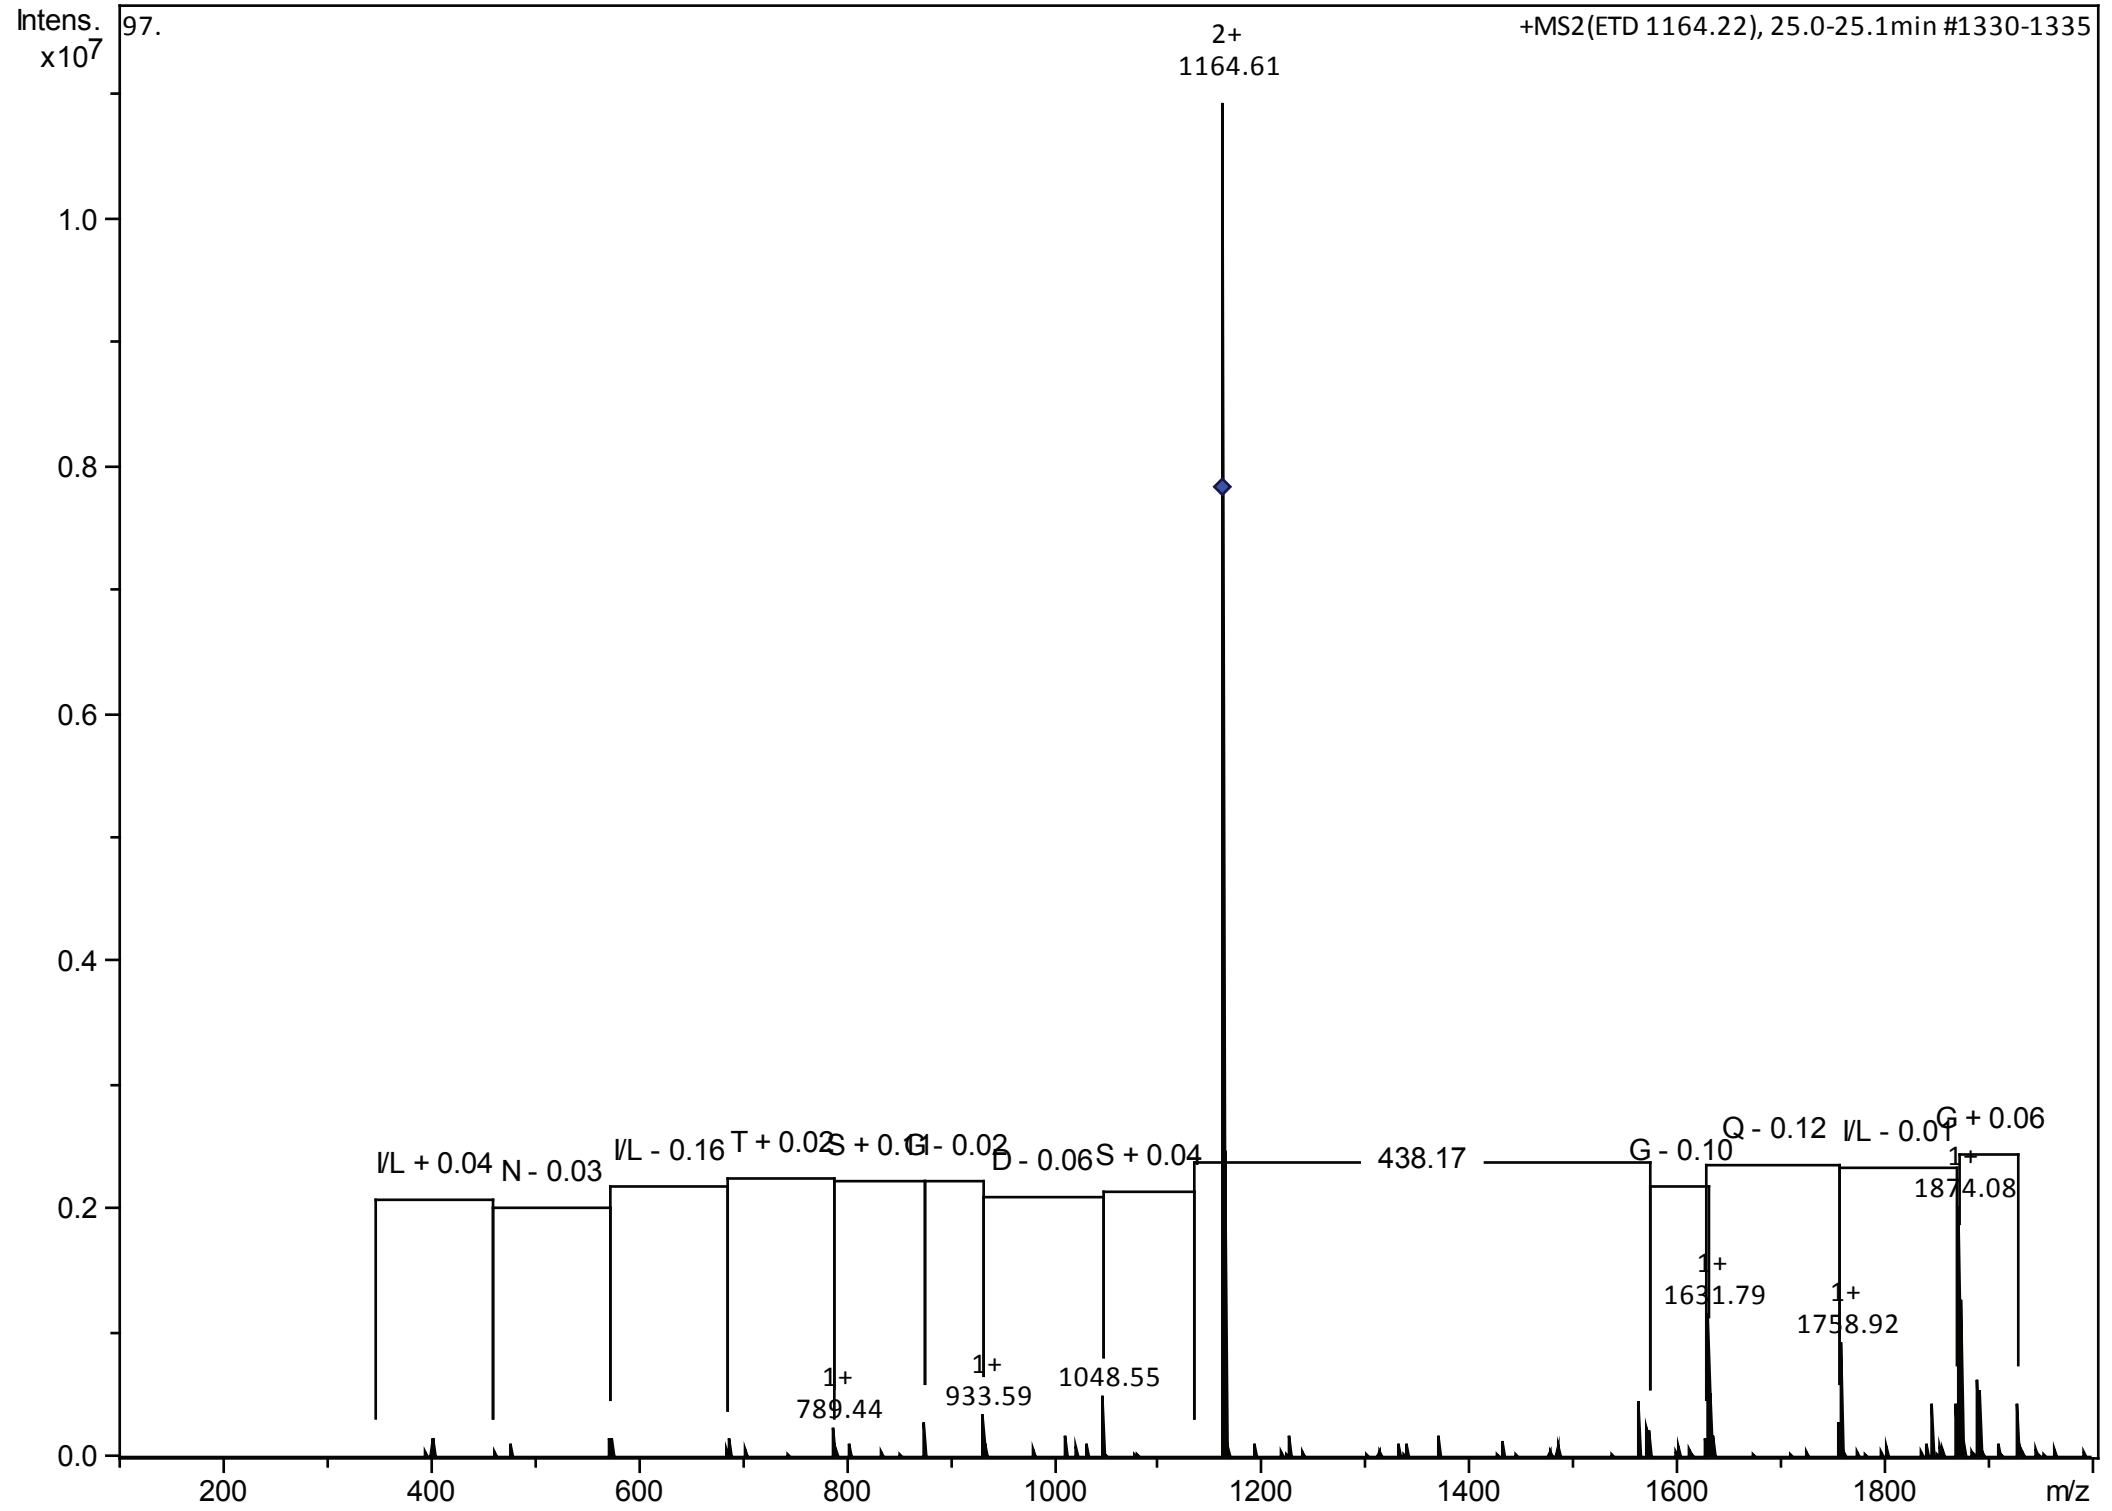

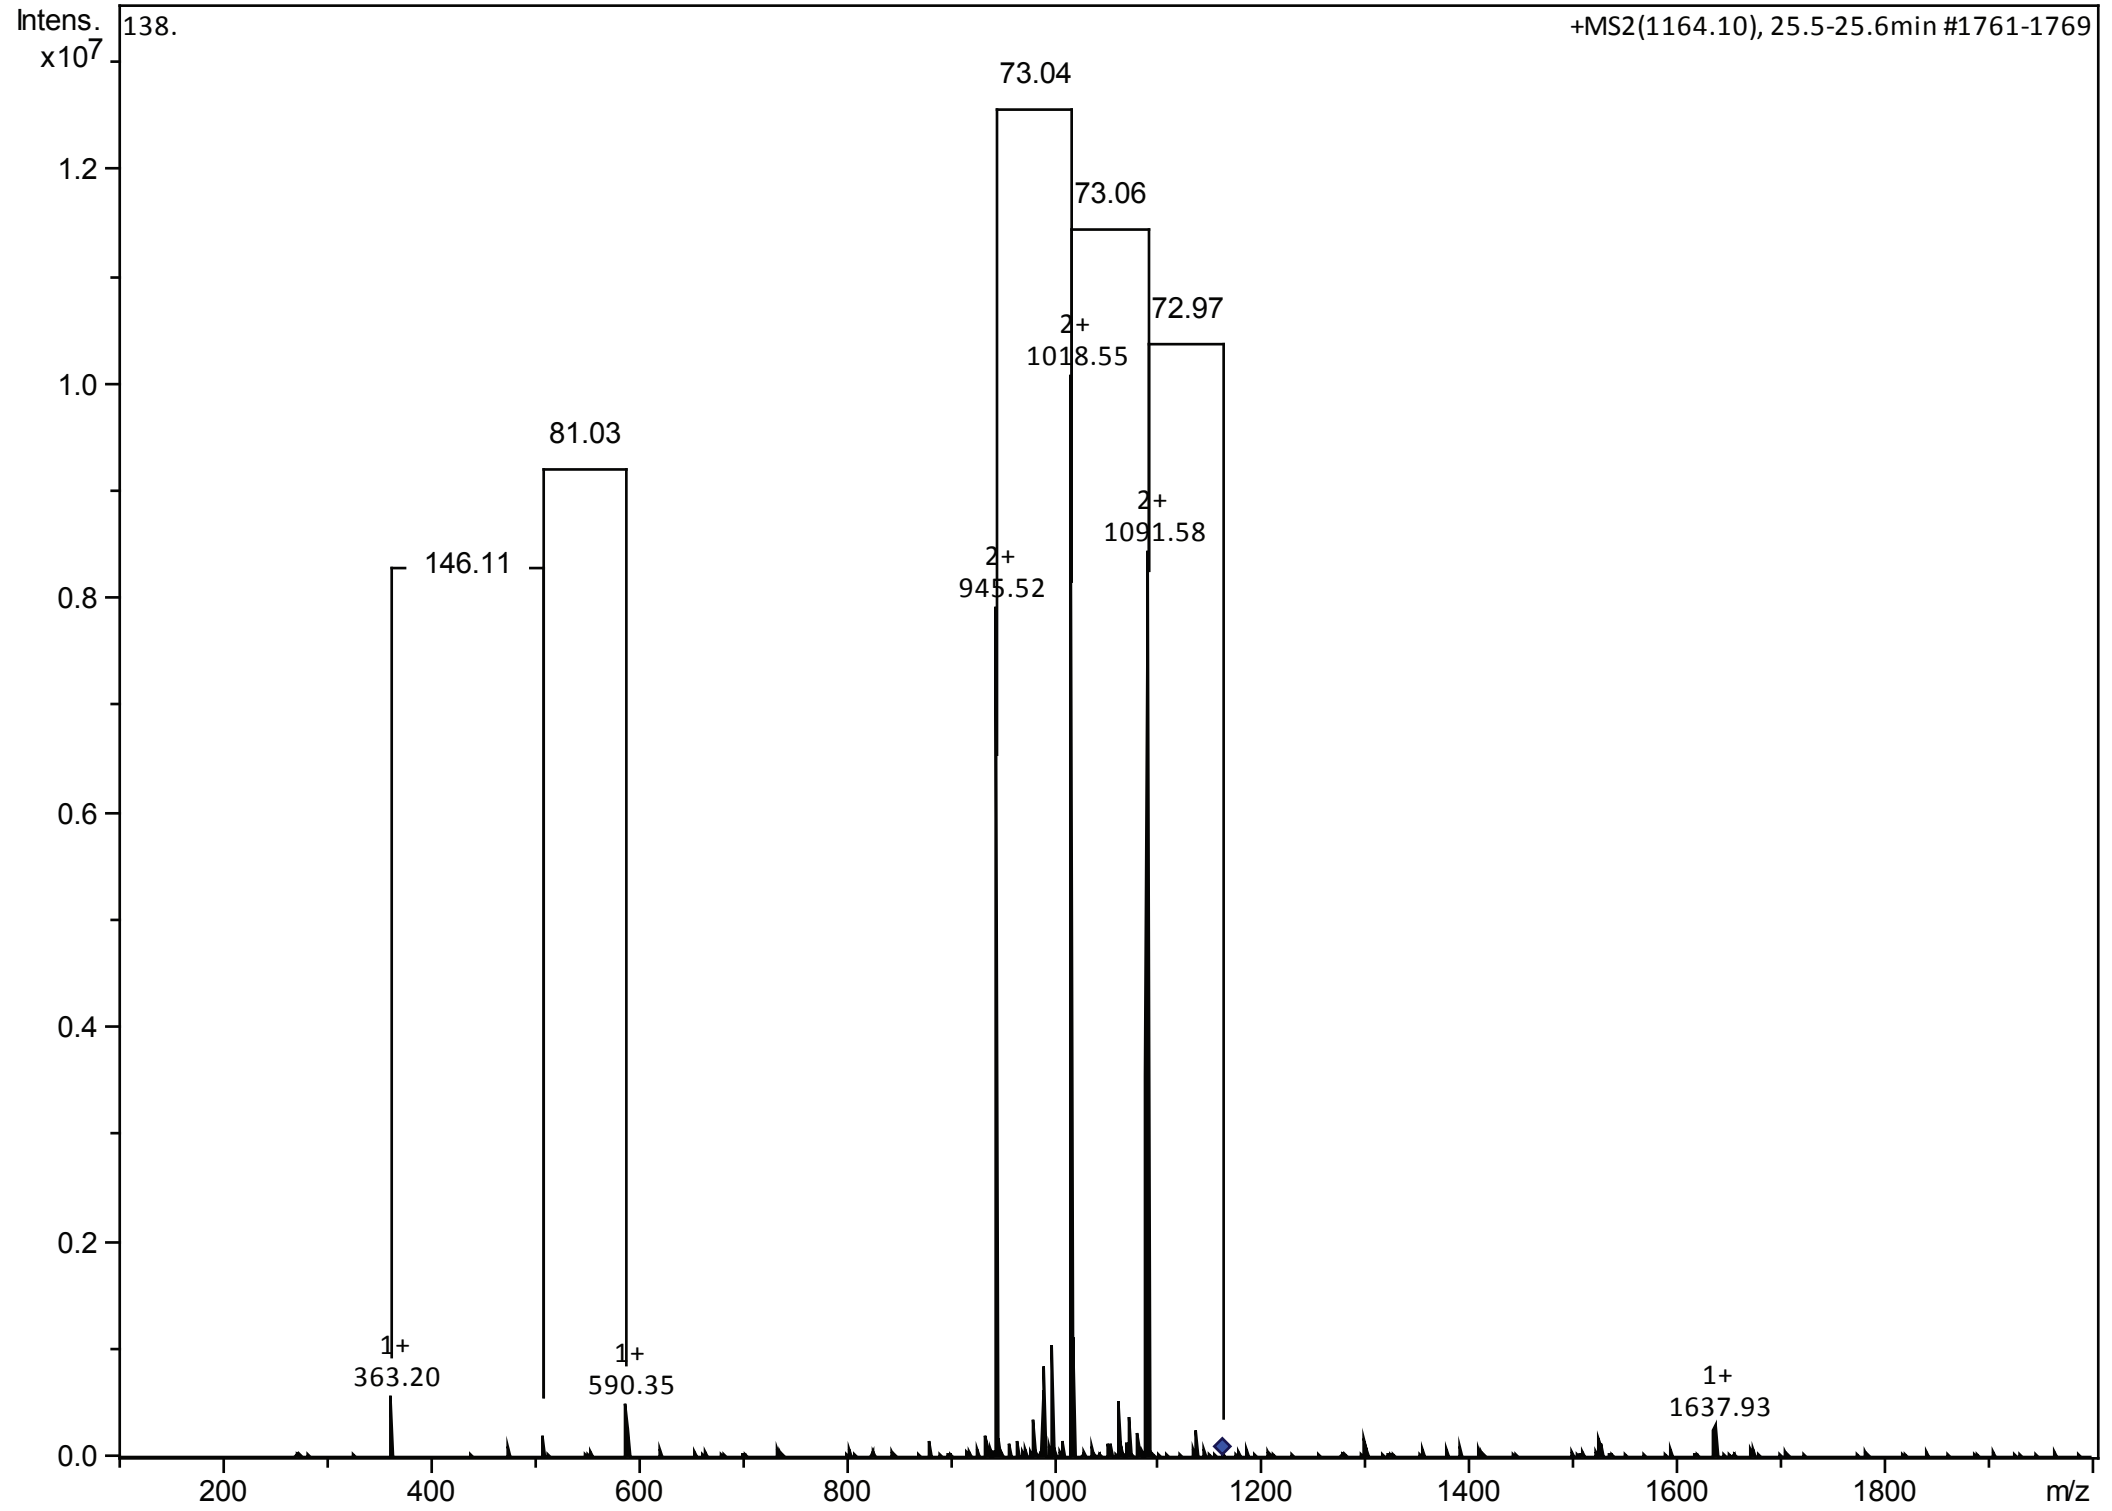

C  
CID



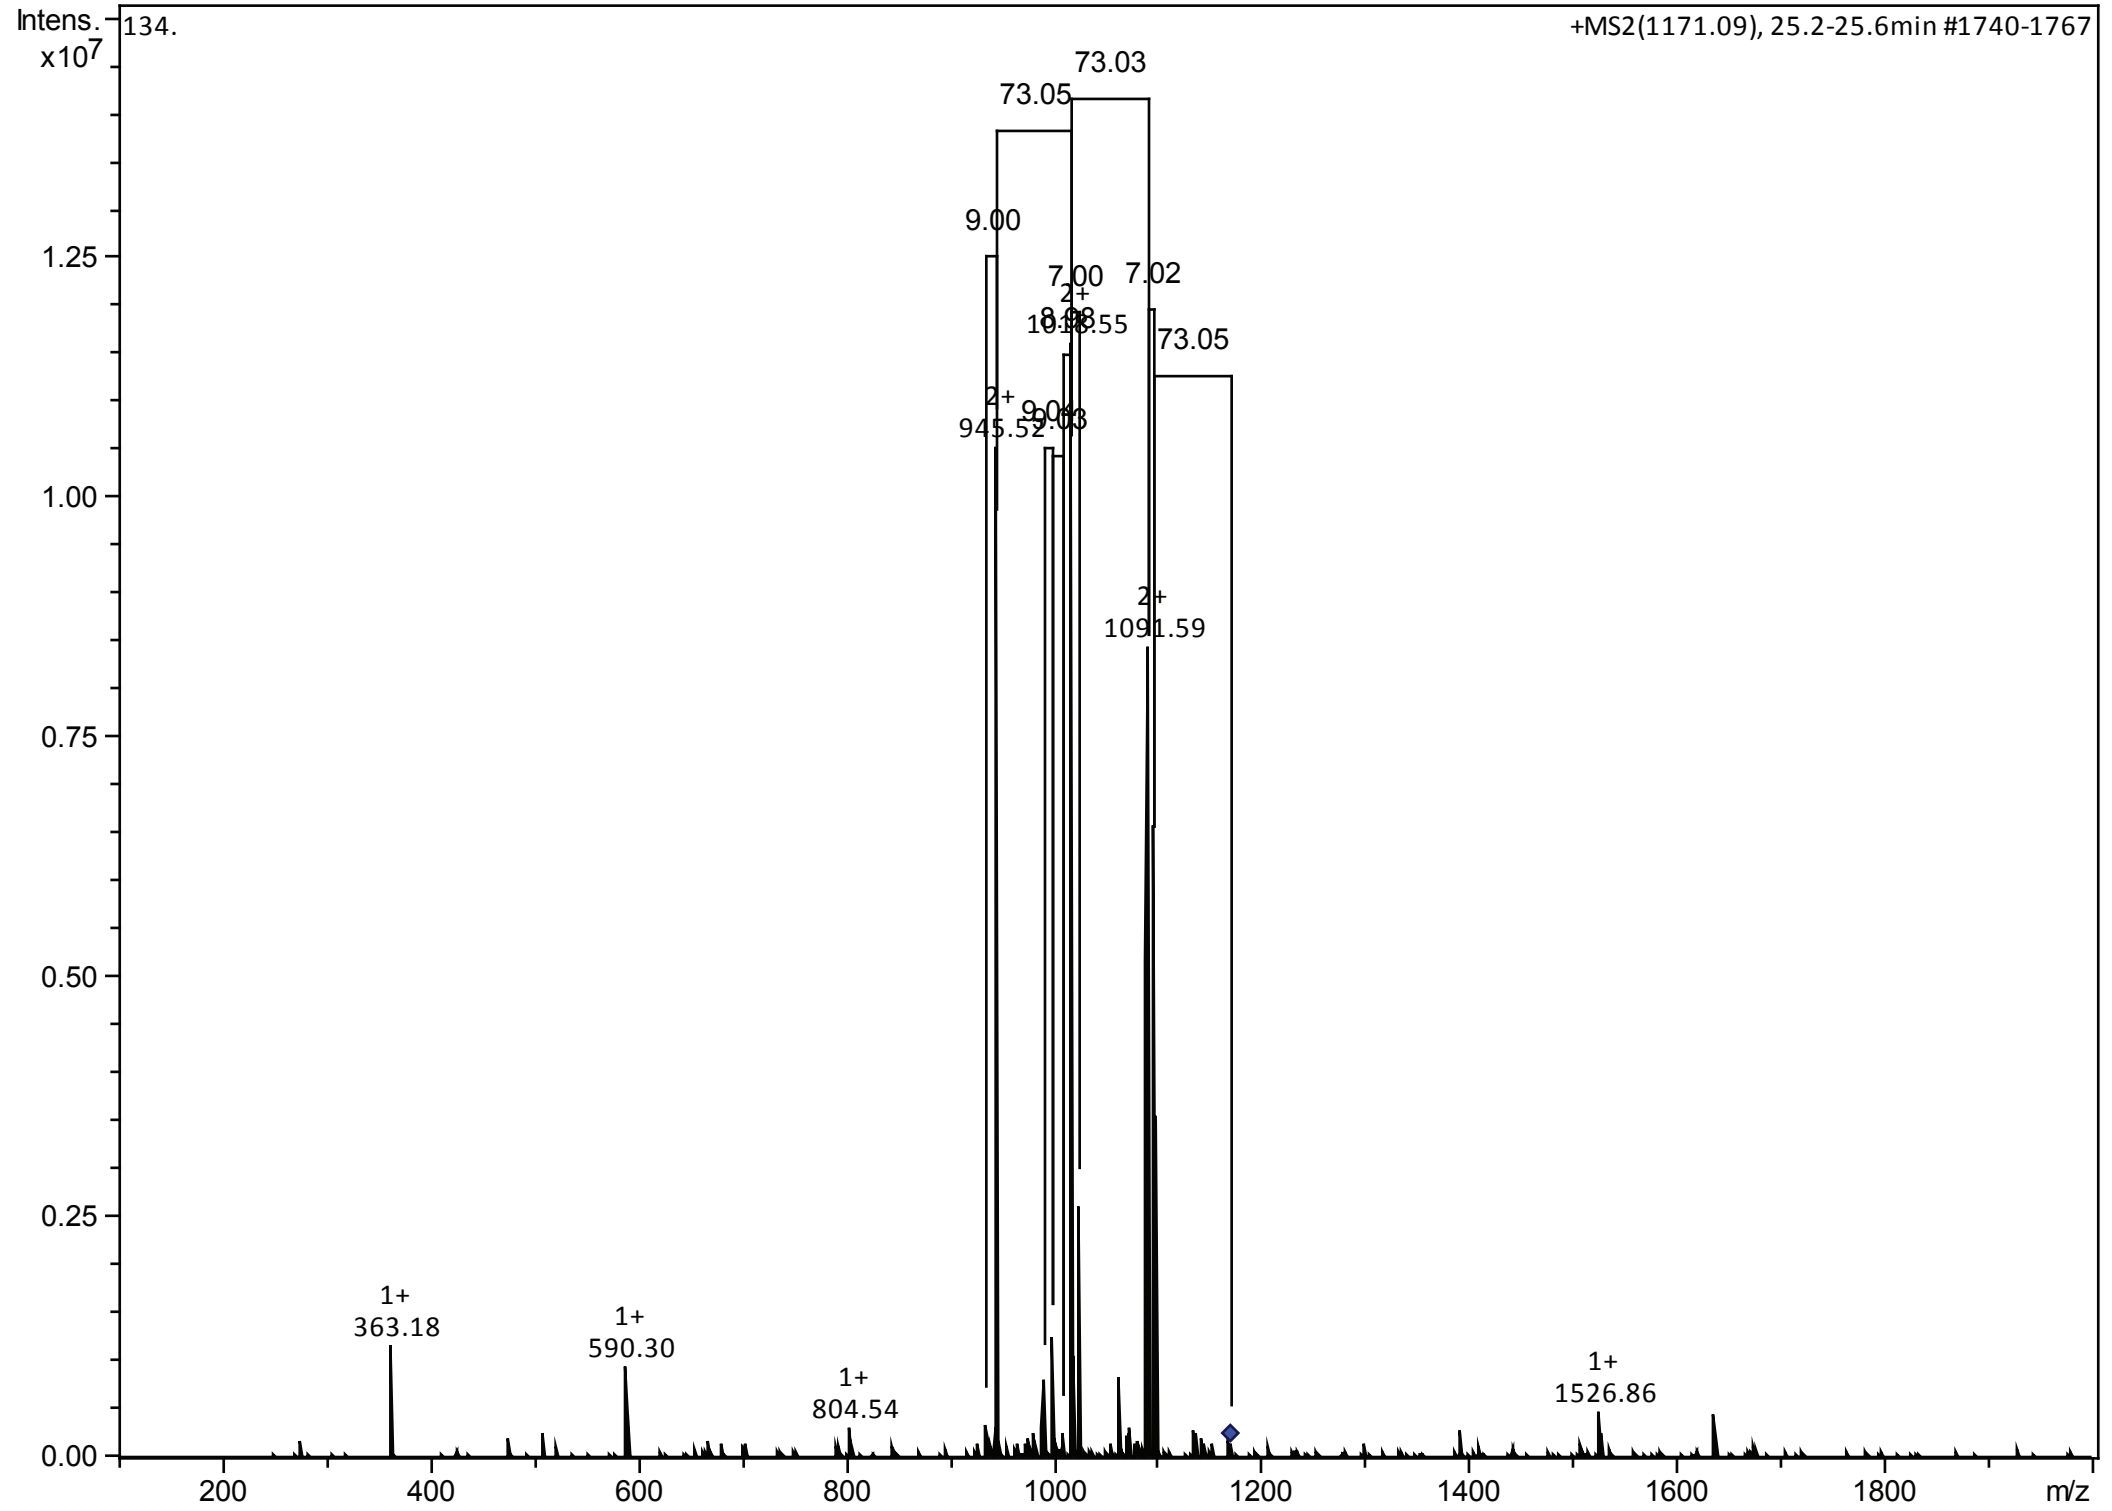

D  
CID

**D**  
ETD

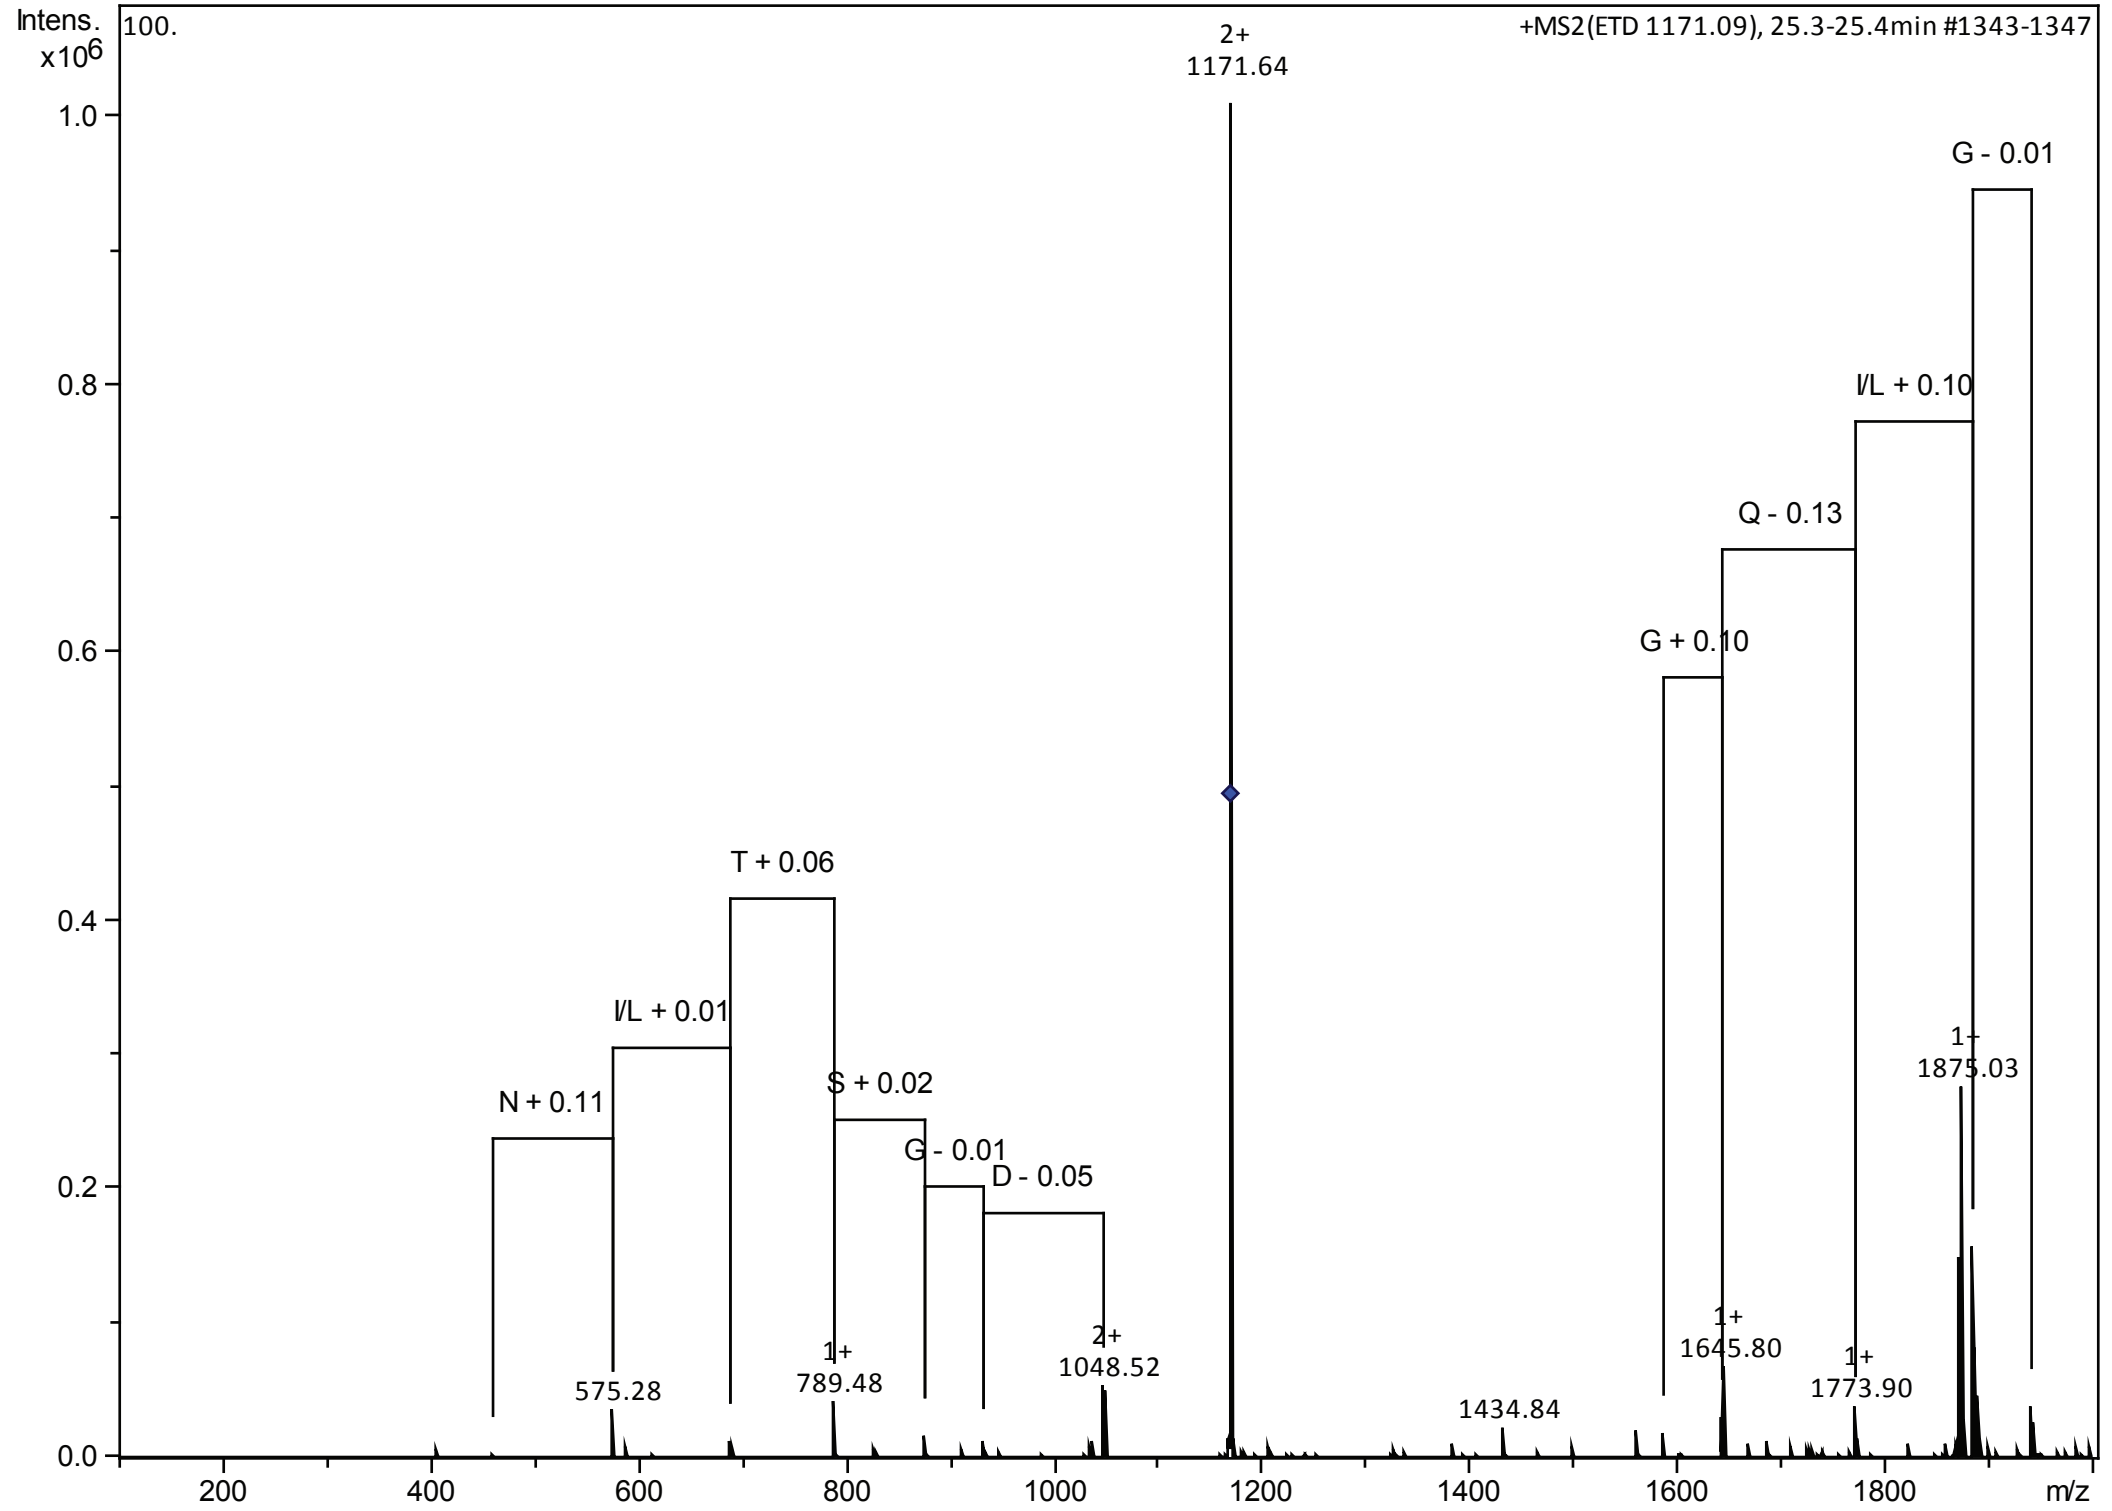



E  
CID

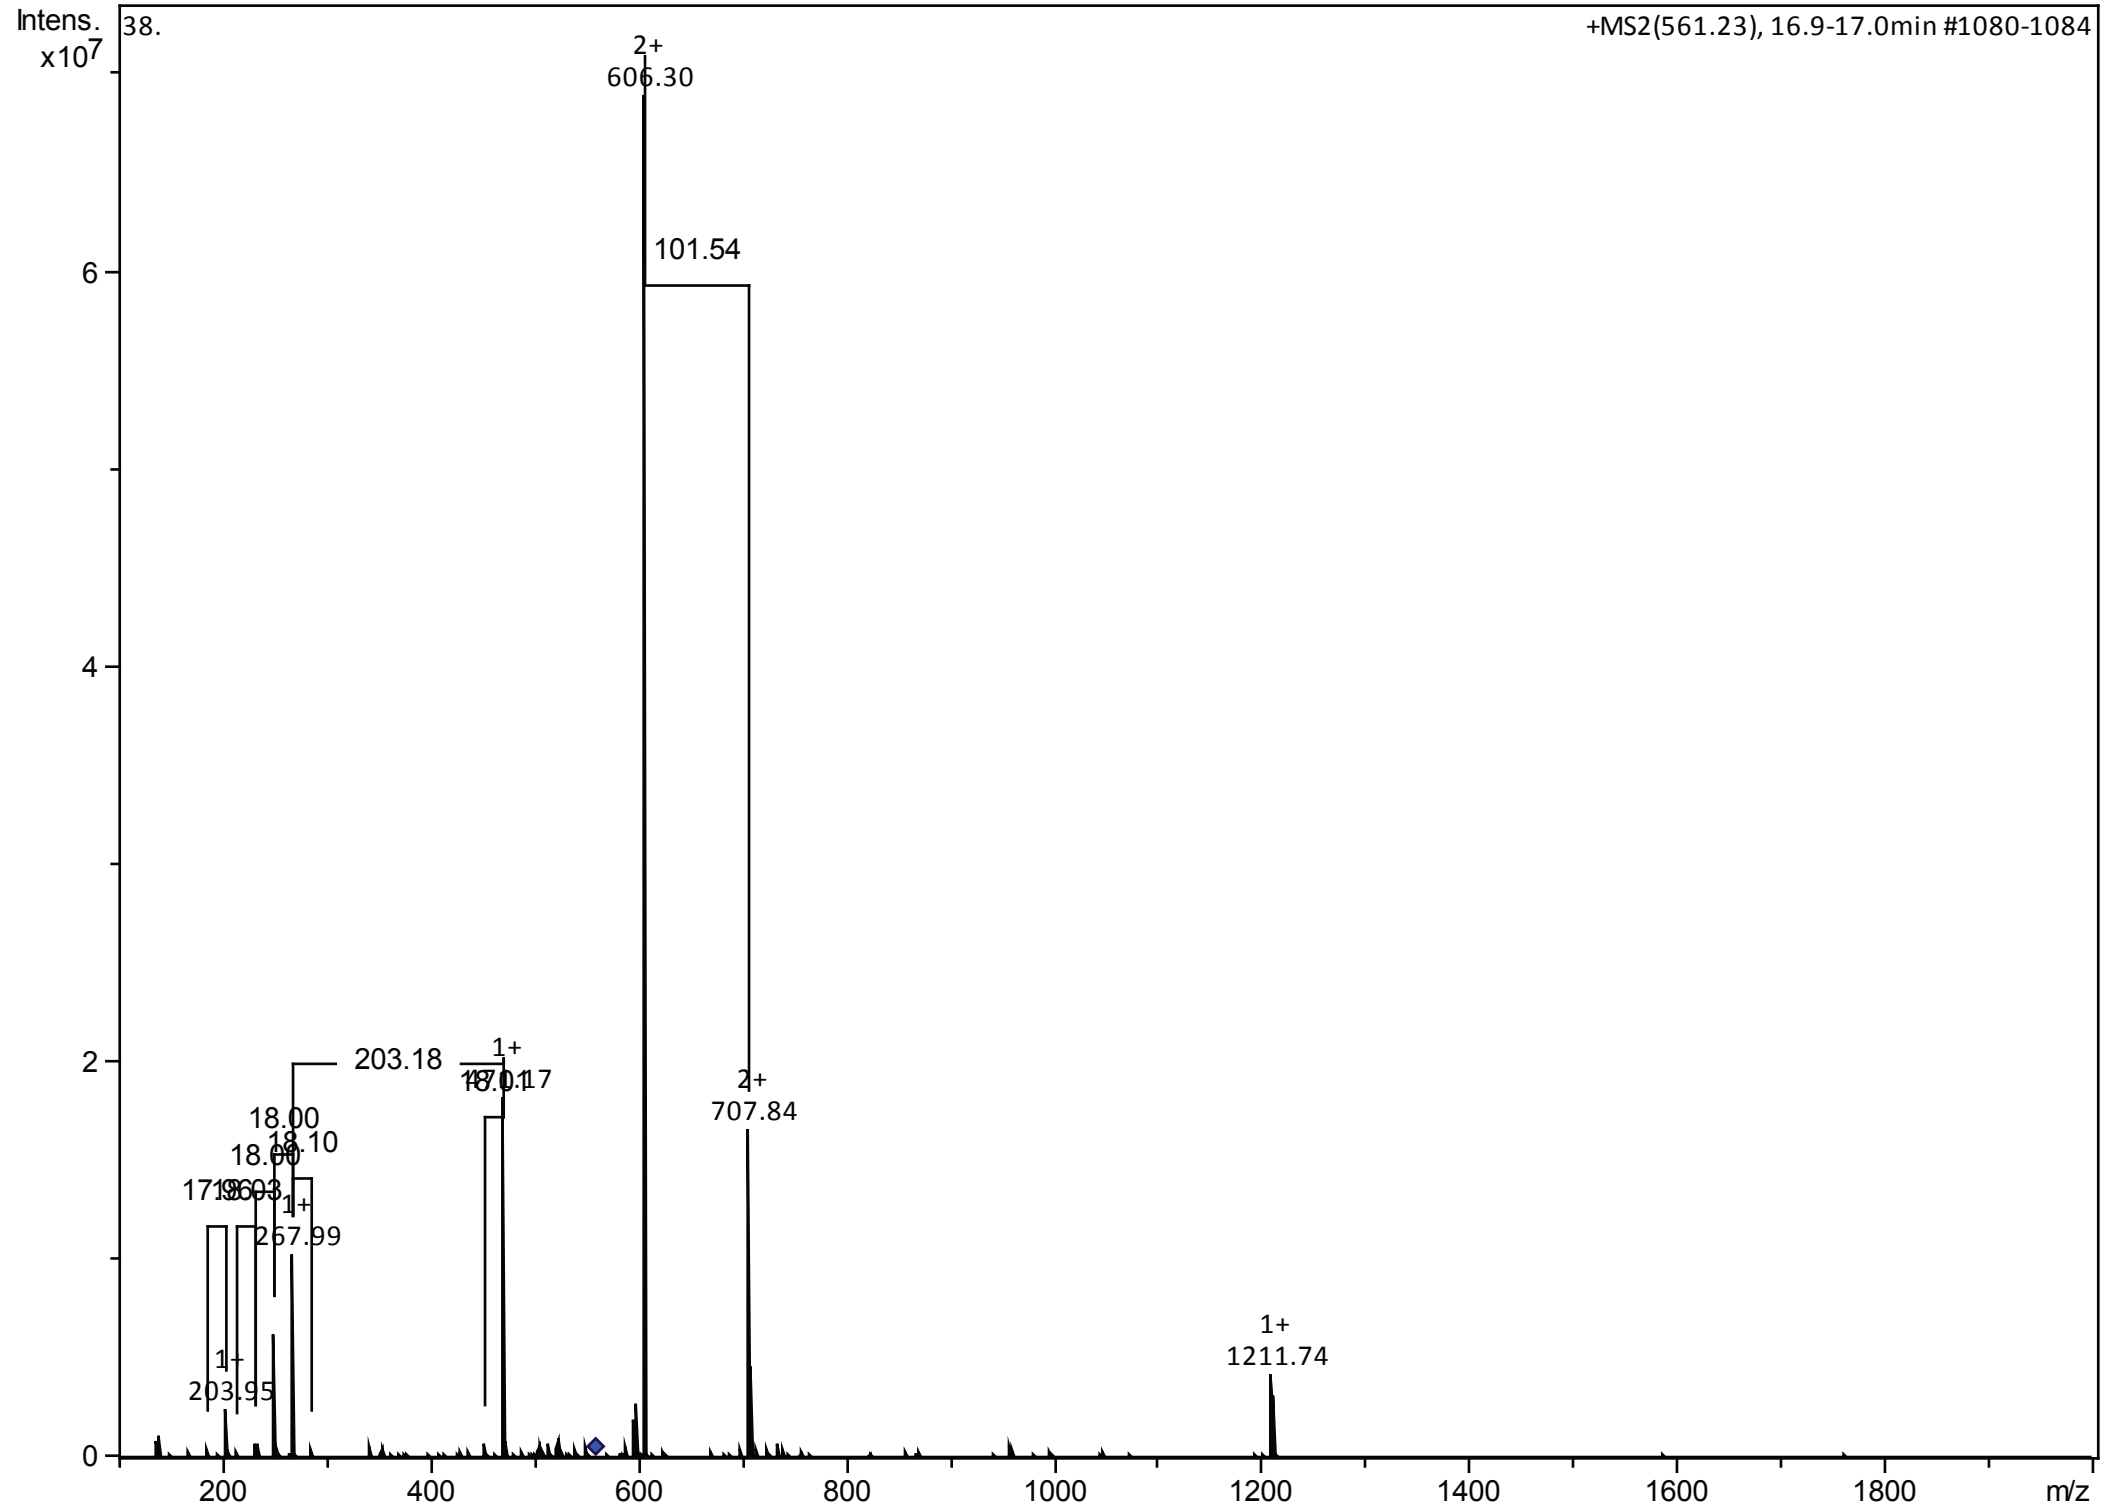



F  
CID

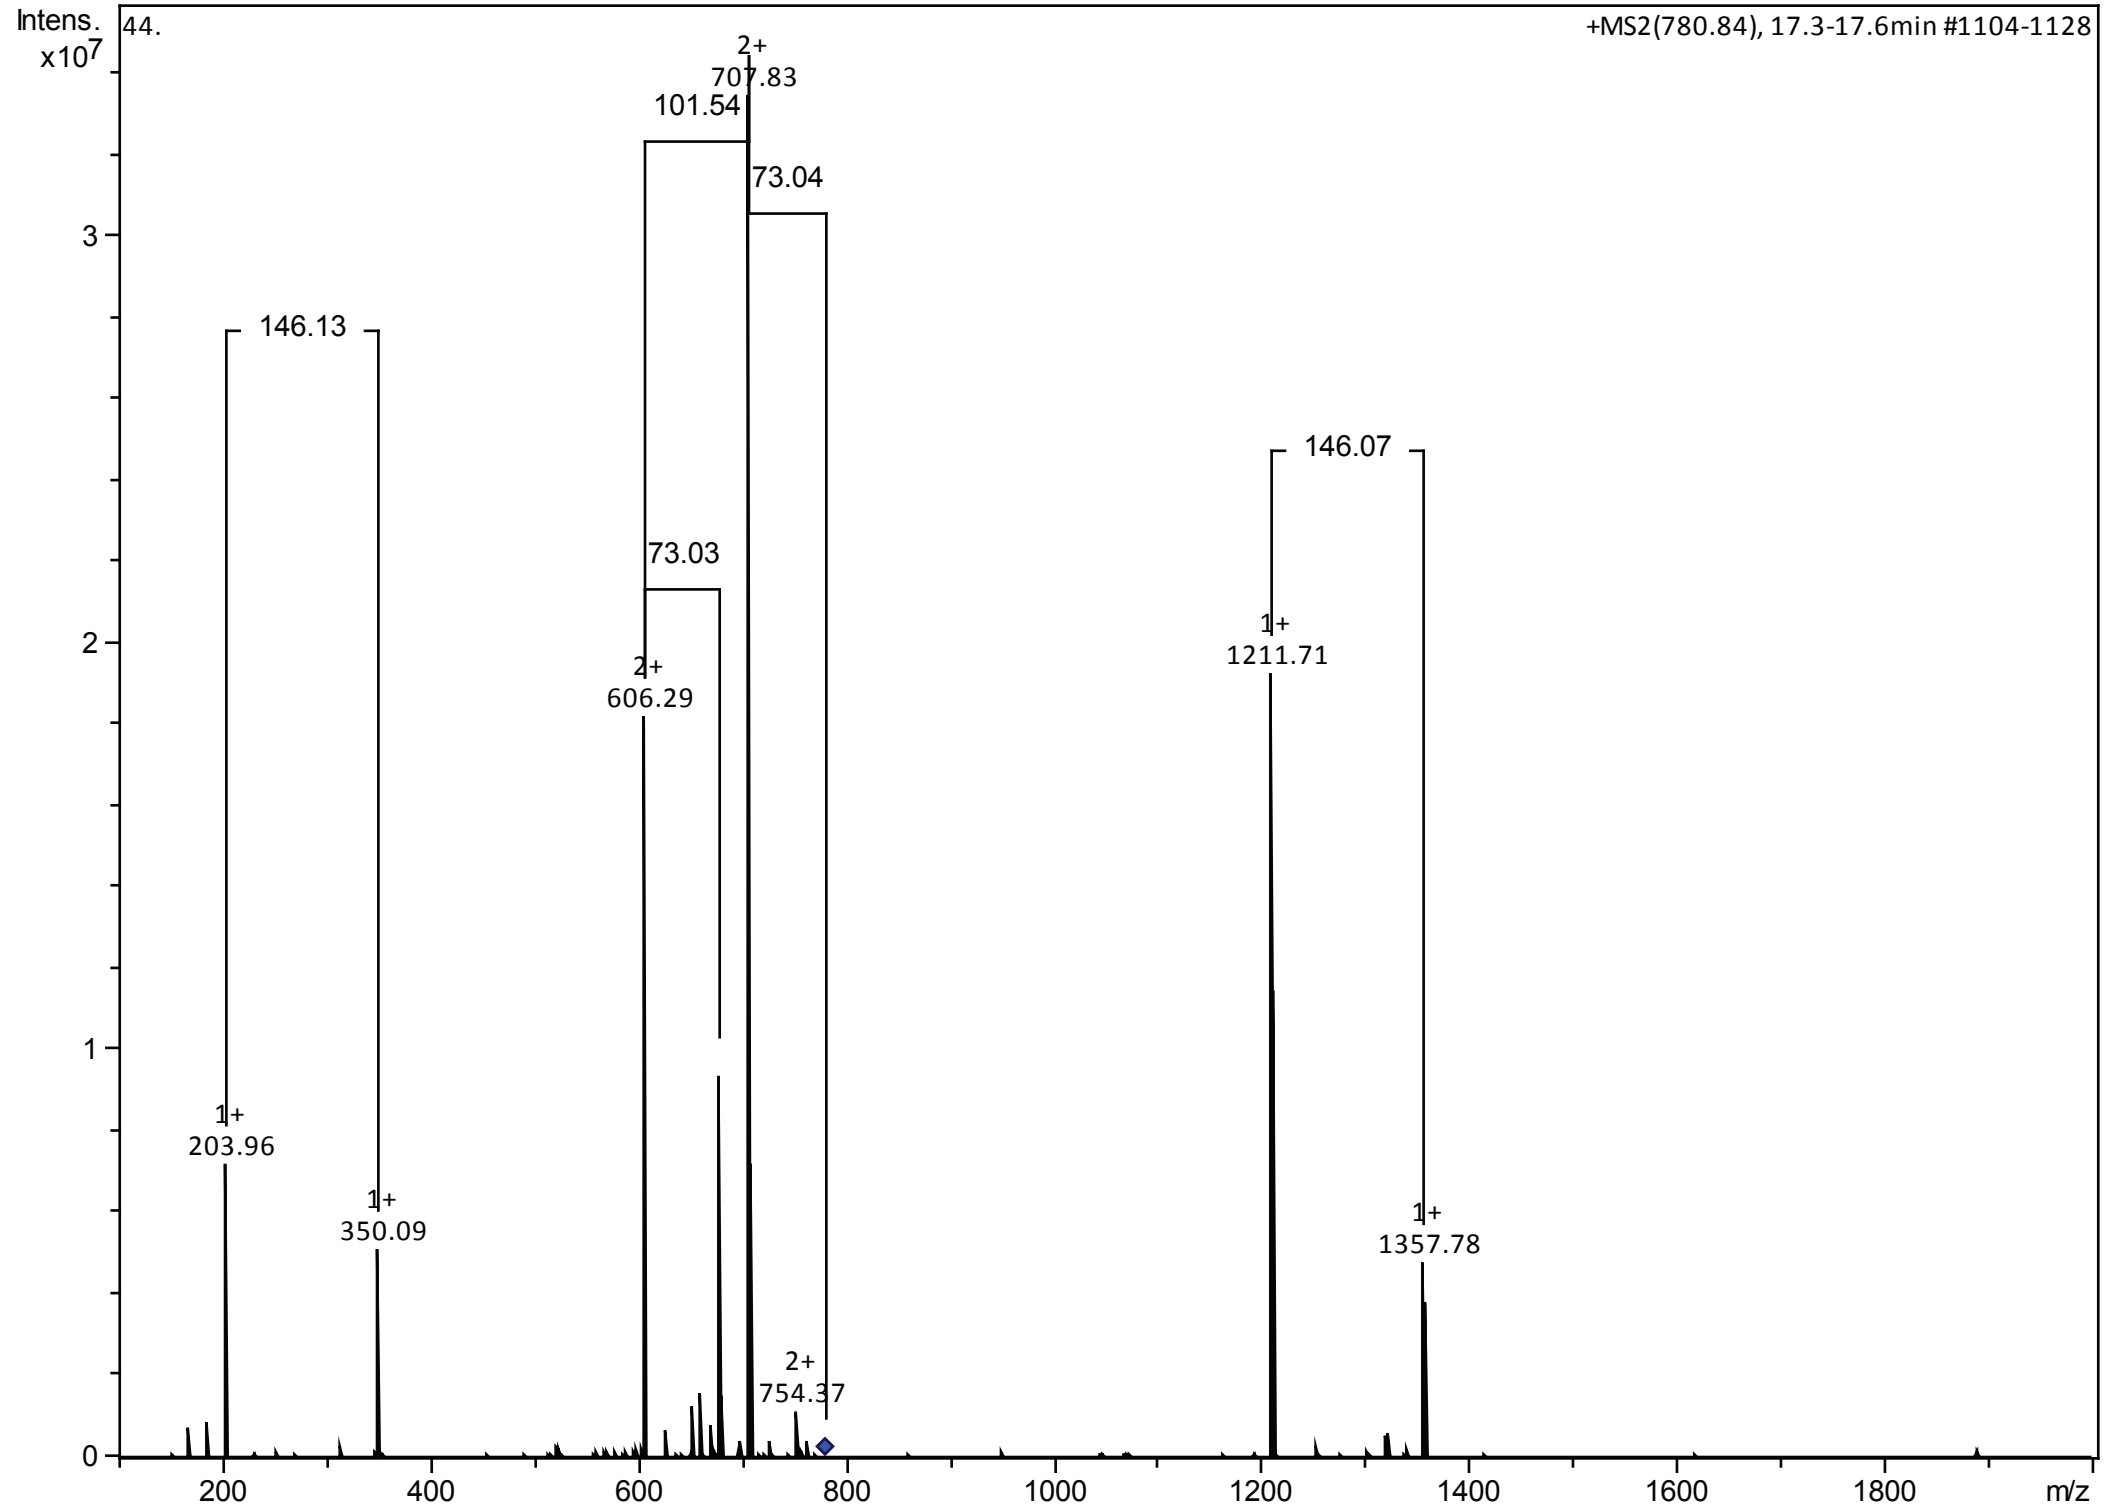

**F**  
ETD

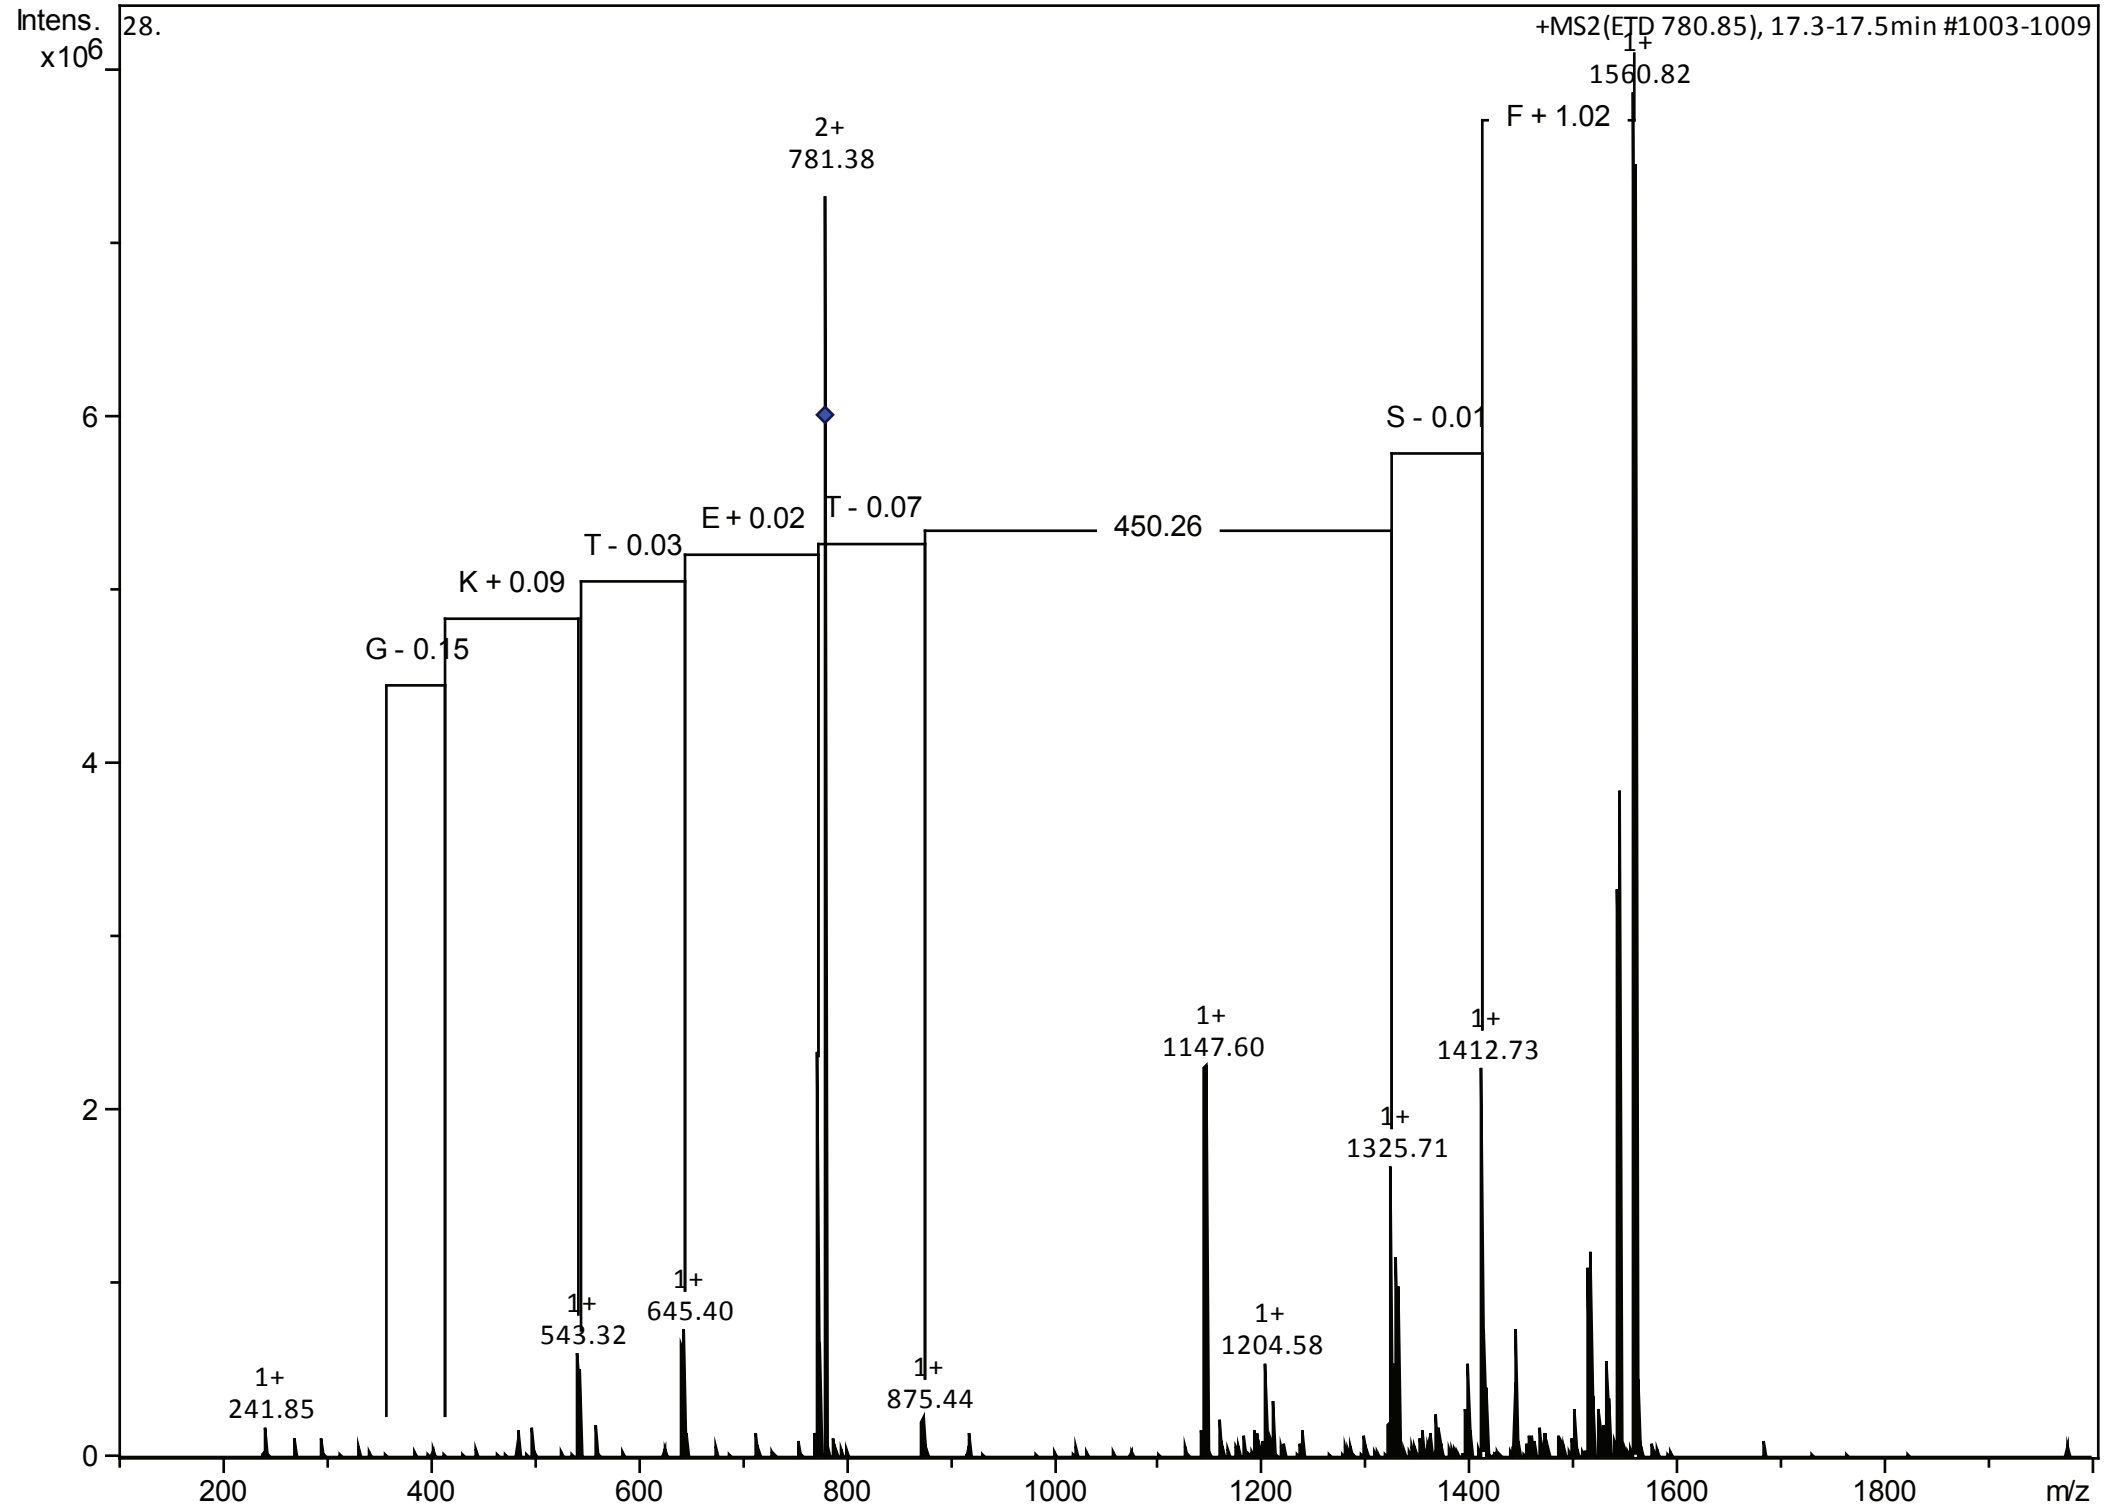

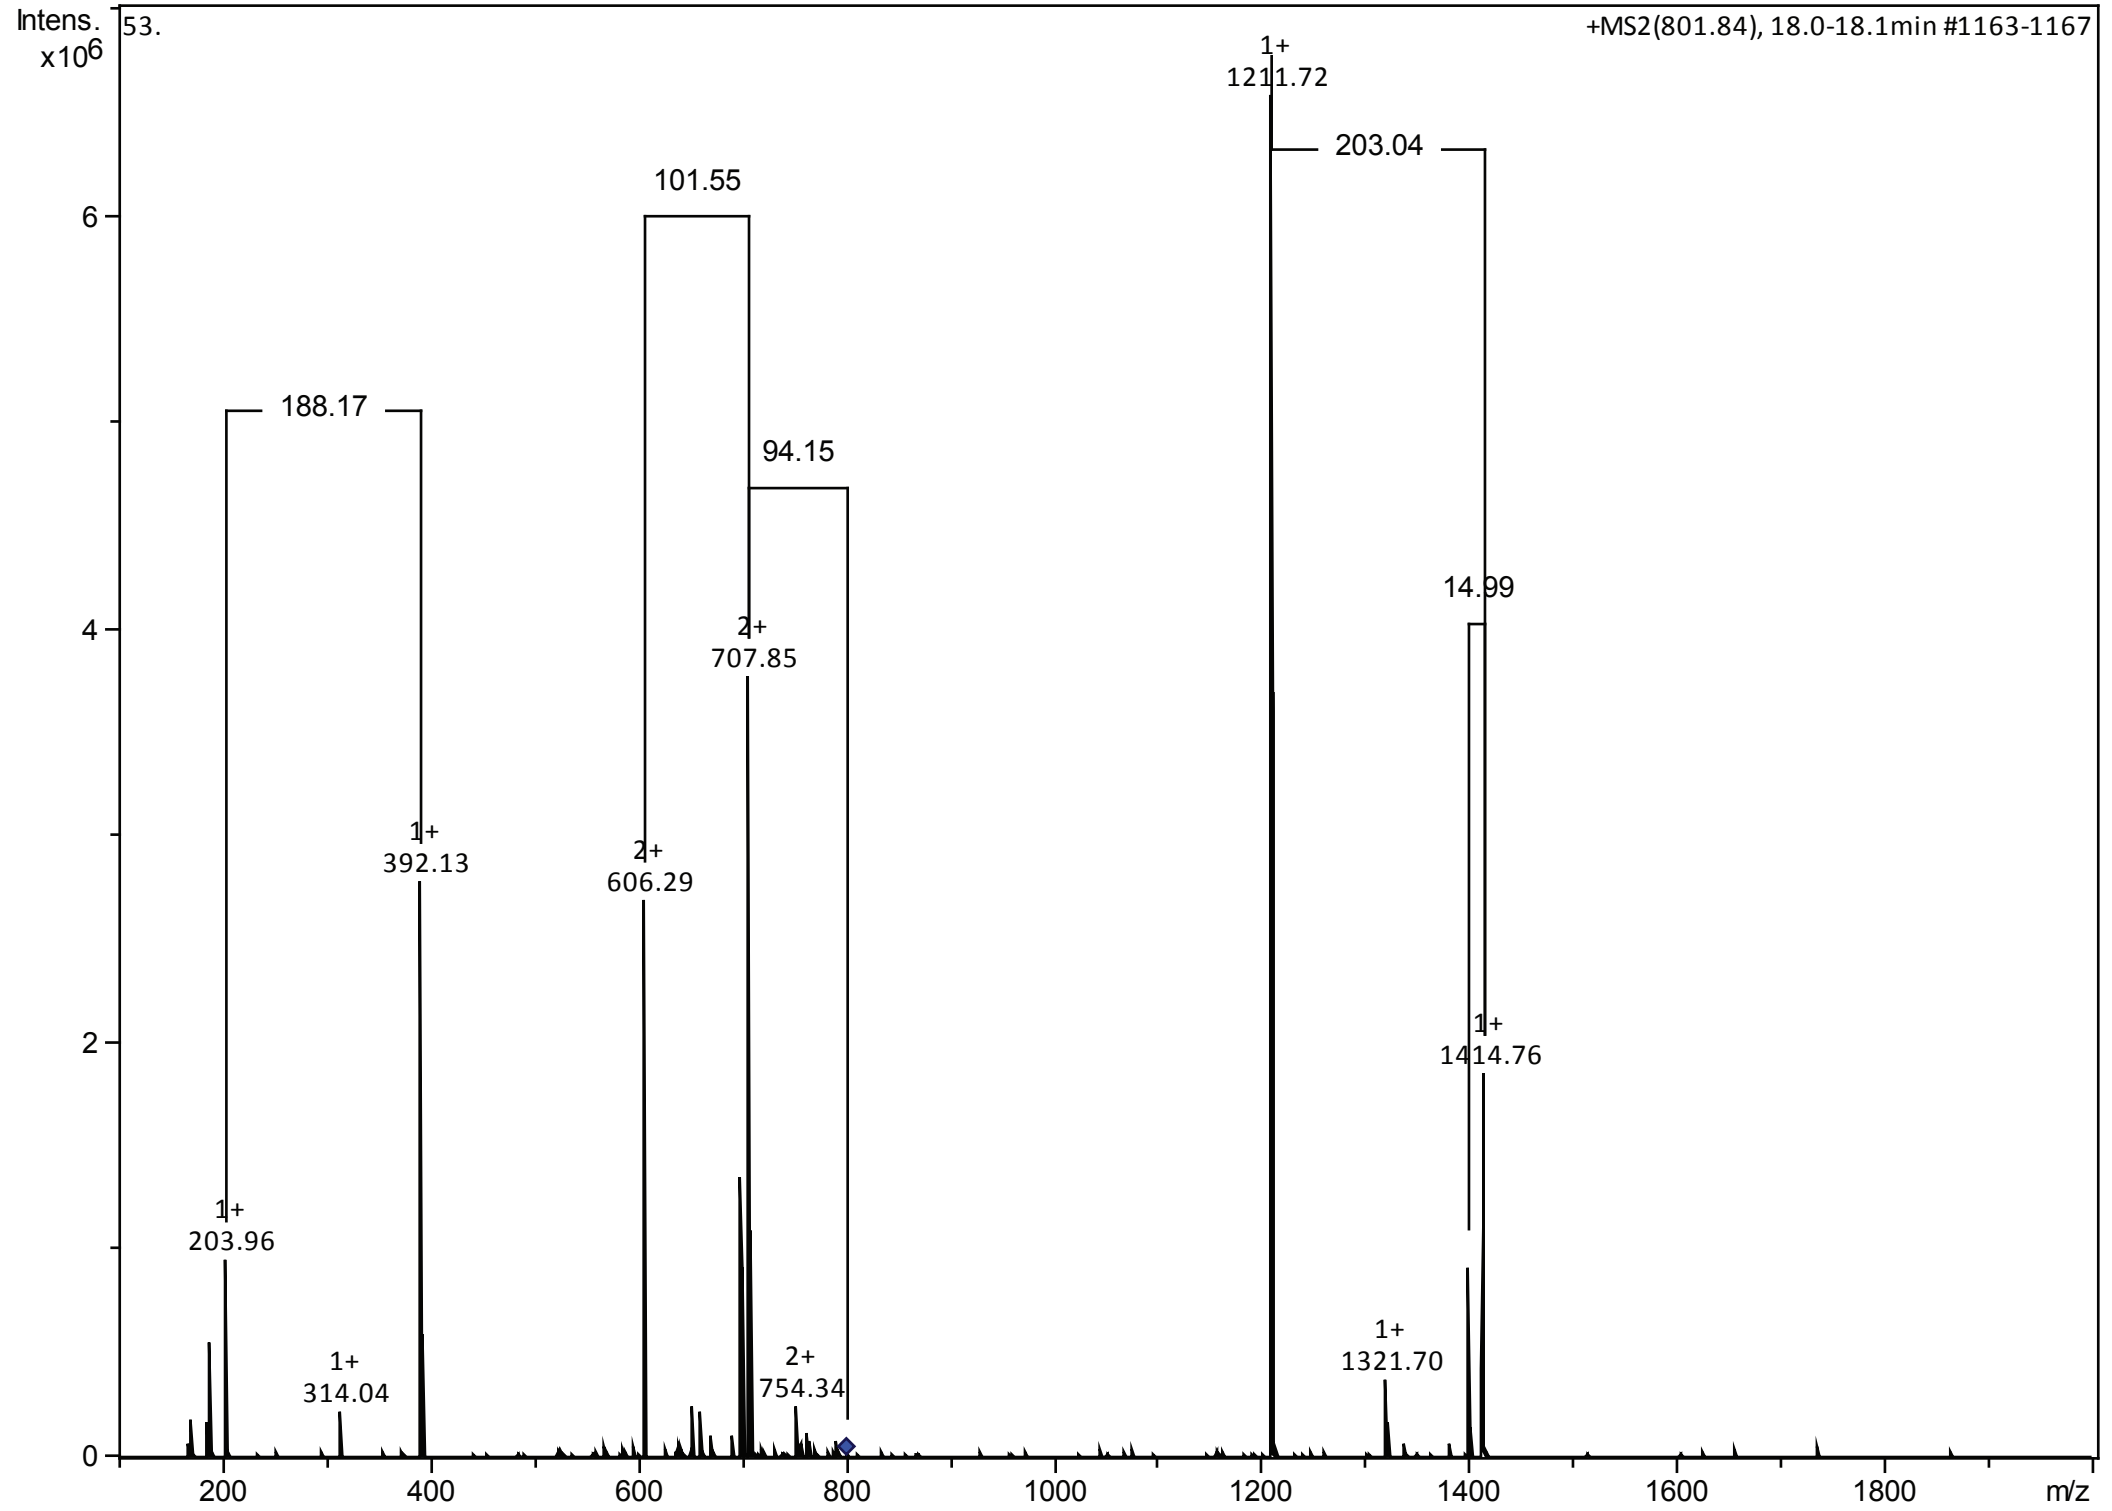

G  
CID

+MS2(801.84), 18.0-18.1min #1163-1167

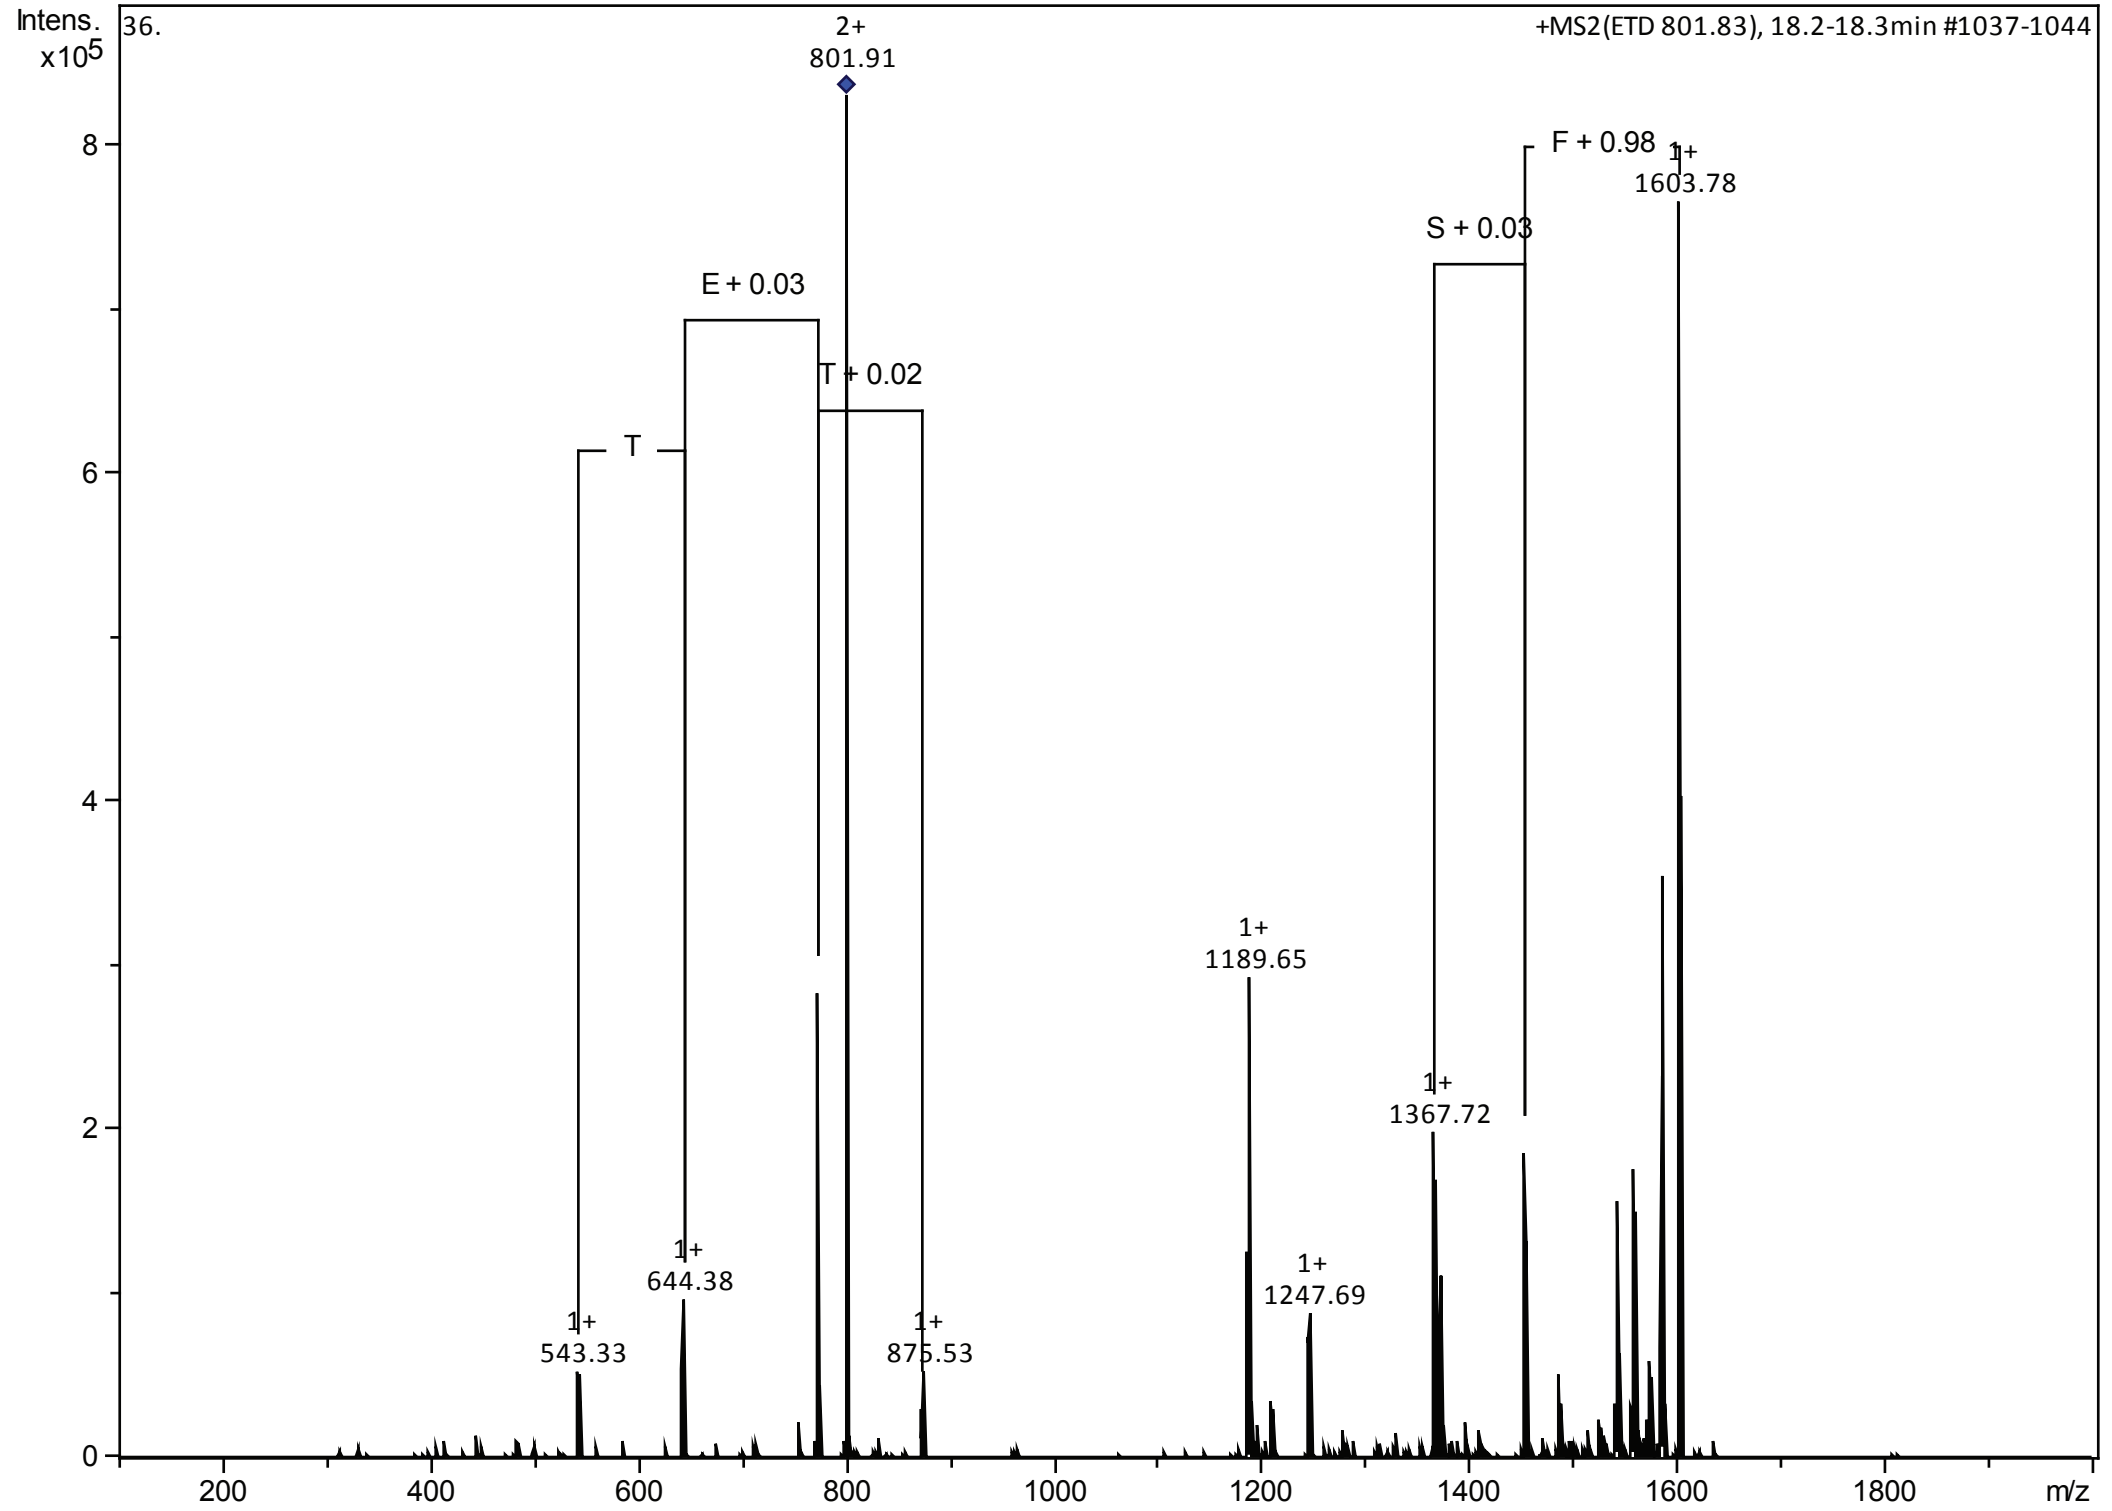

G  
ETD

+MS2(ETD 801.83), 18.2-18.3min #1037-1044

H  
CID

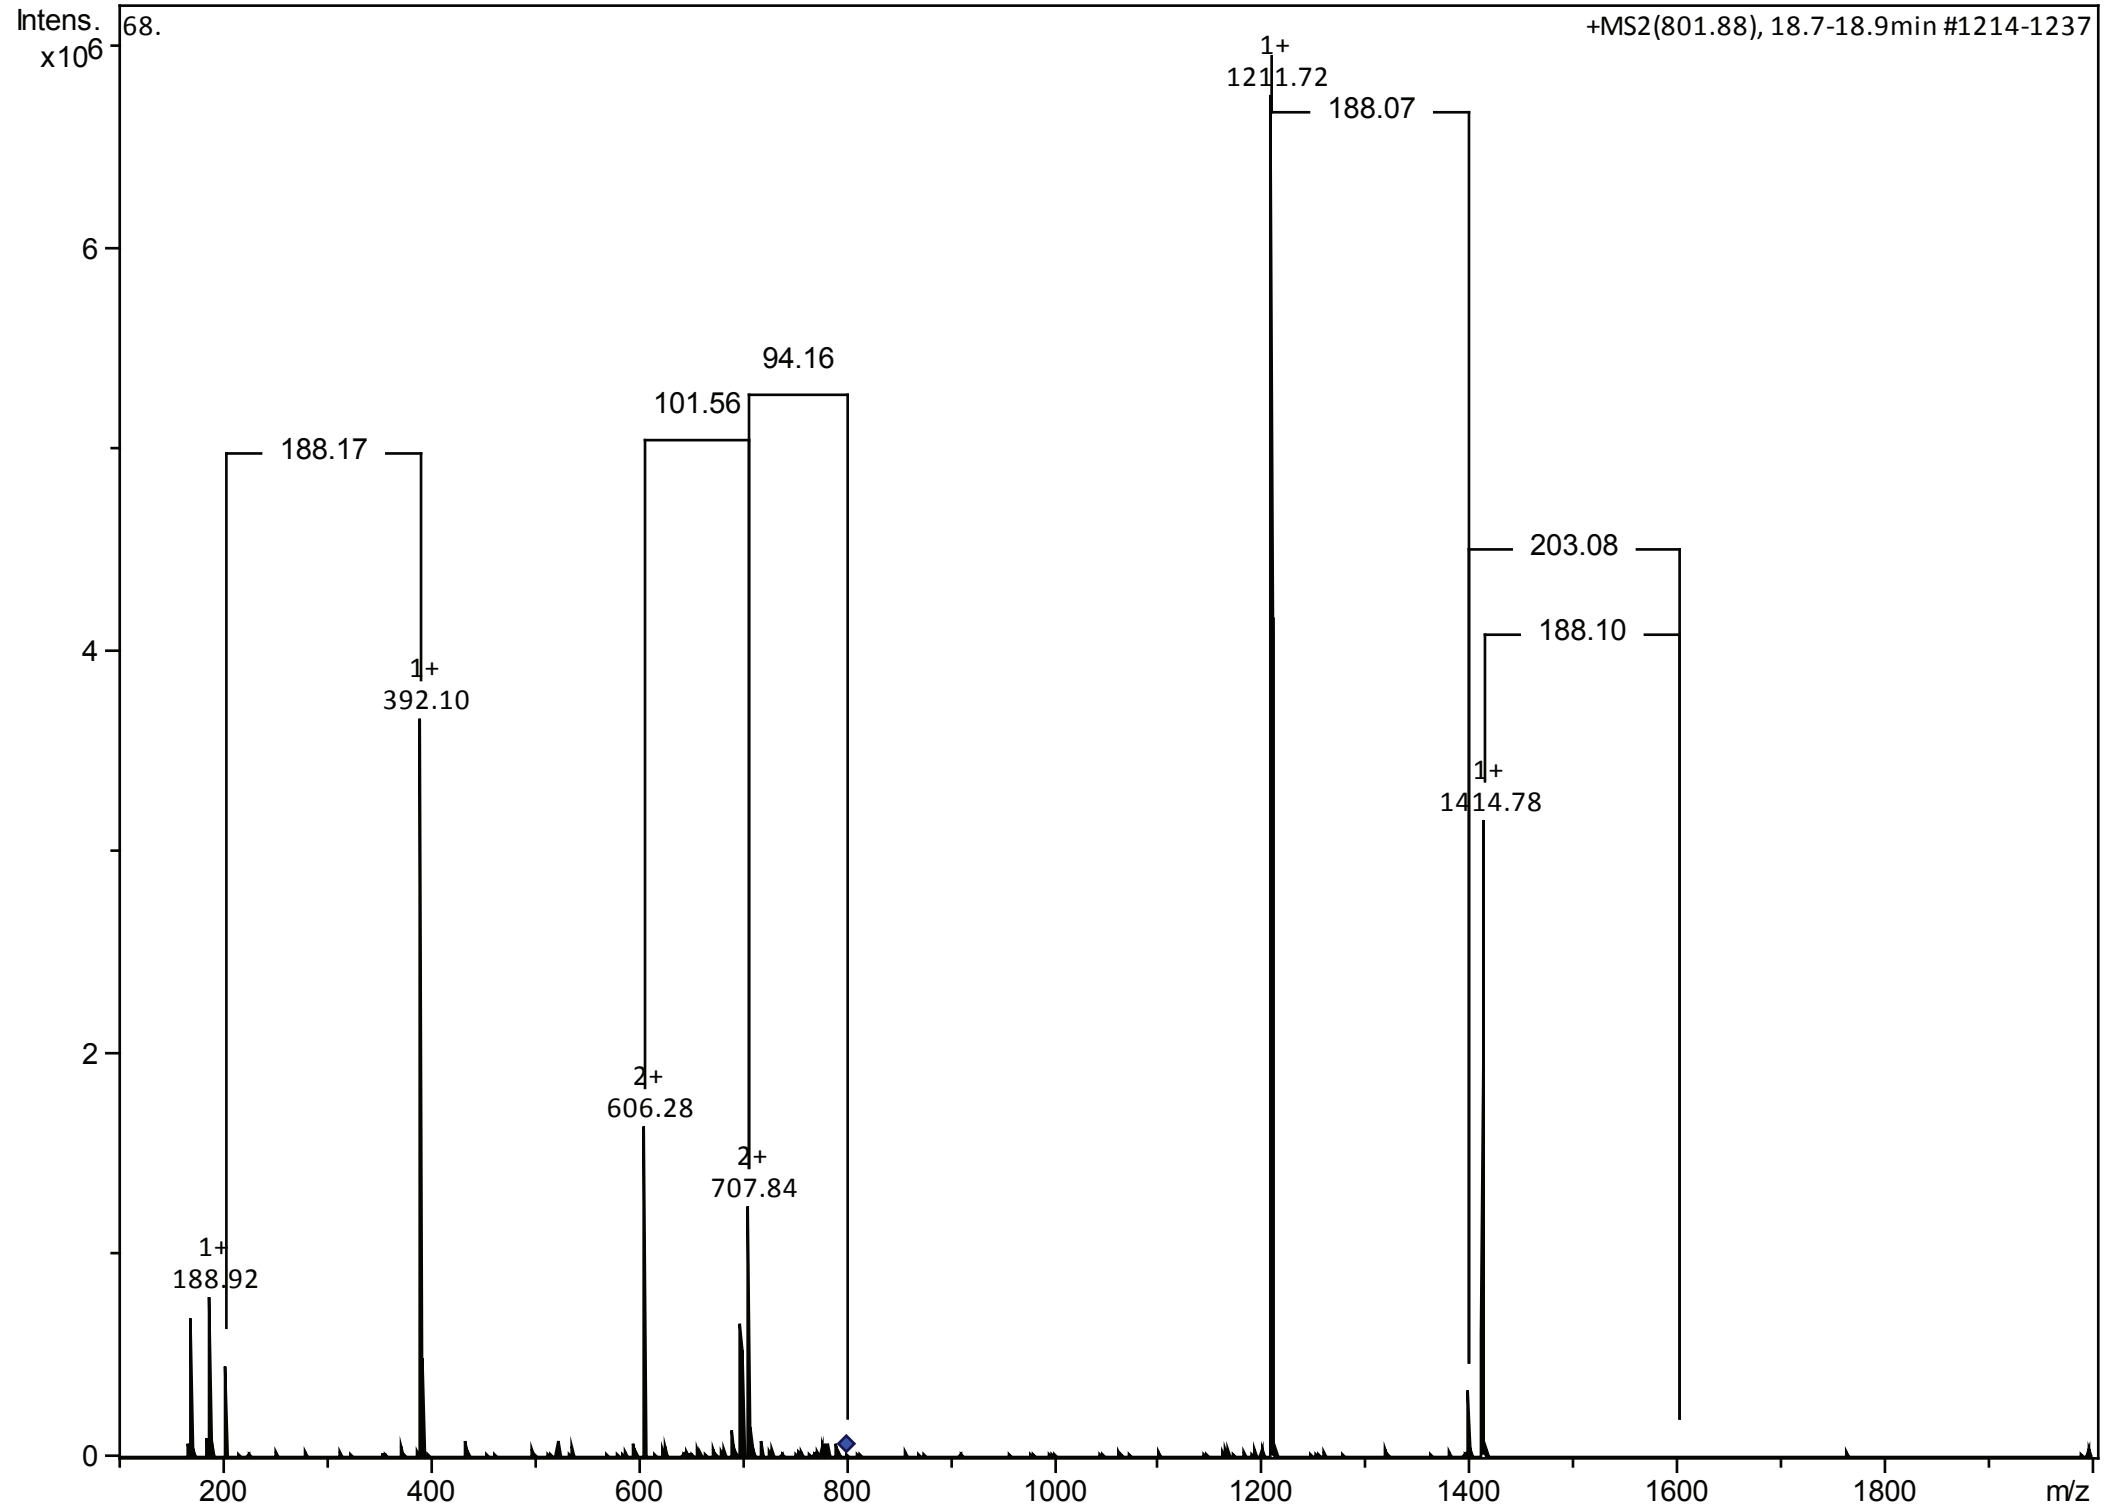

+MS2(801.88), 18.7-18.9min #1214-1237

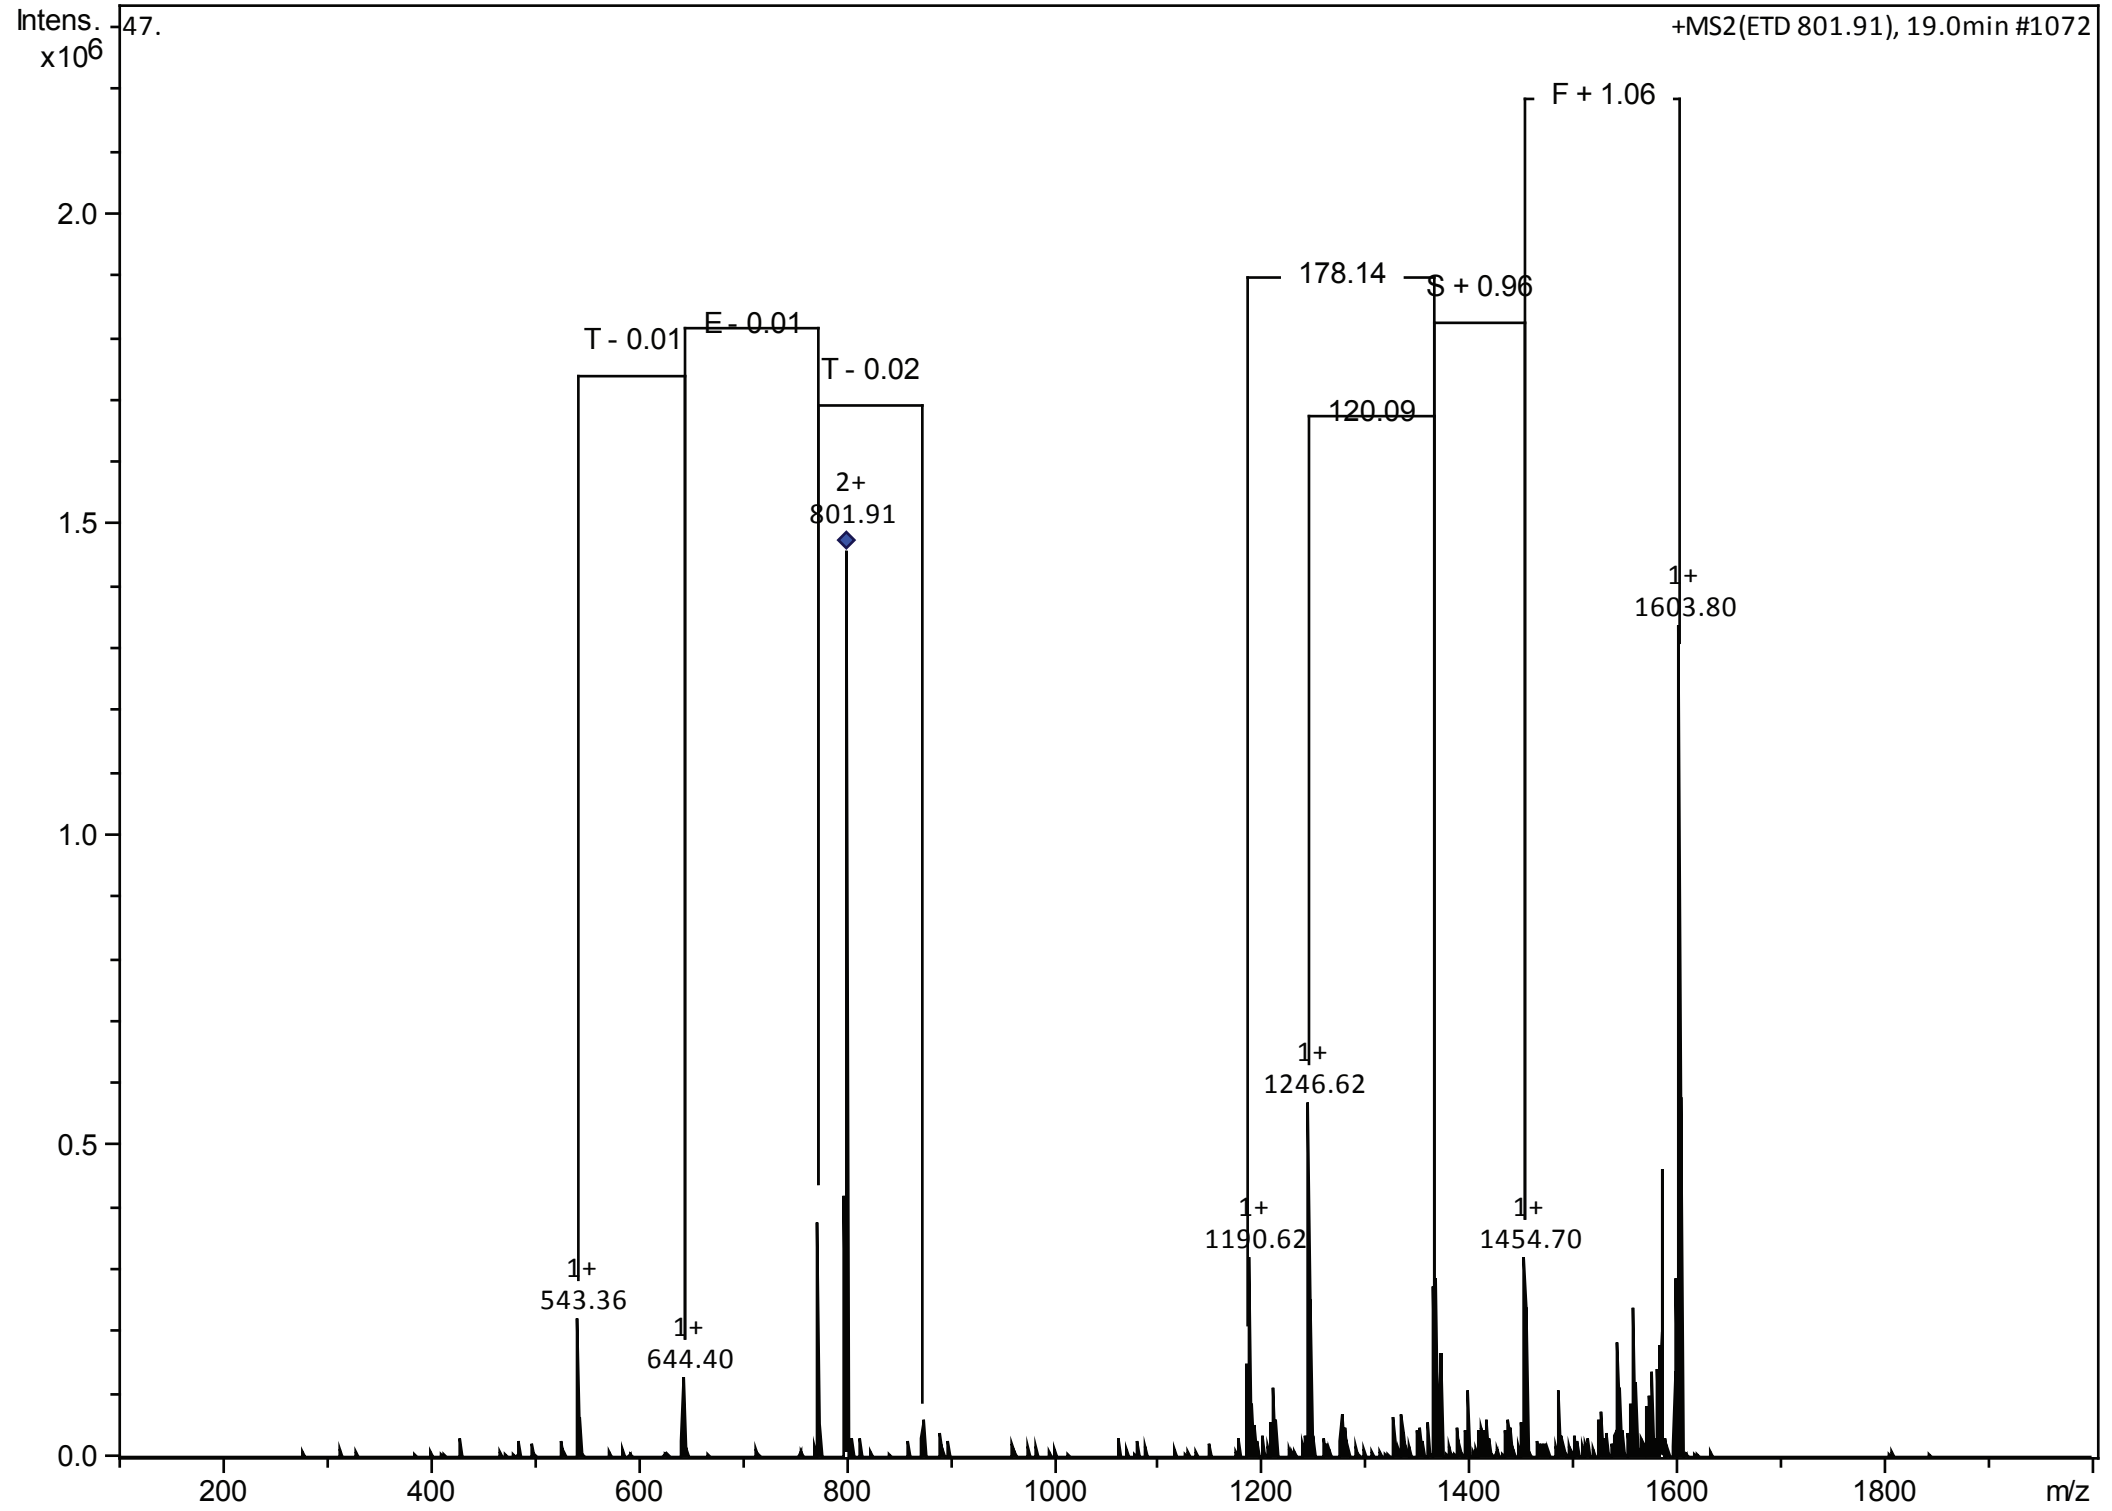

H  
ETD

+MS2(ETD 801.91), 19.0min #1072



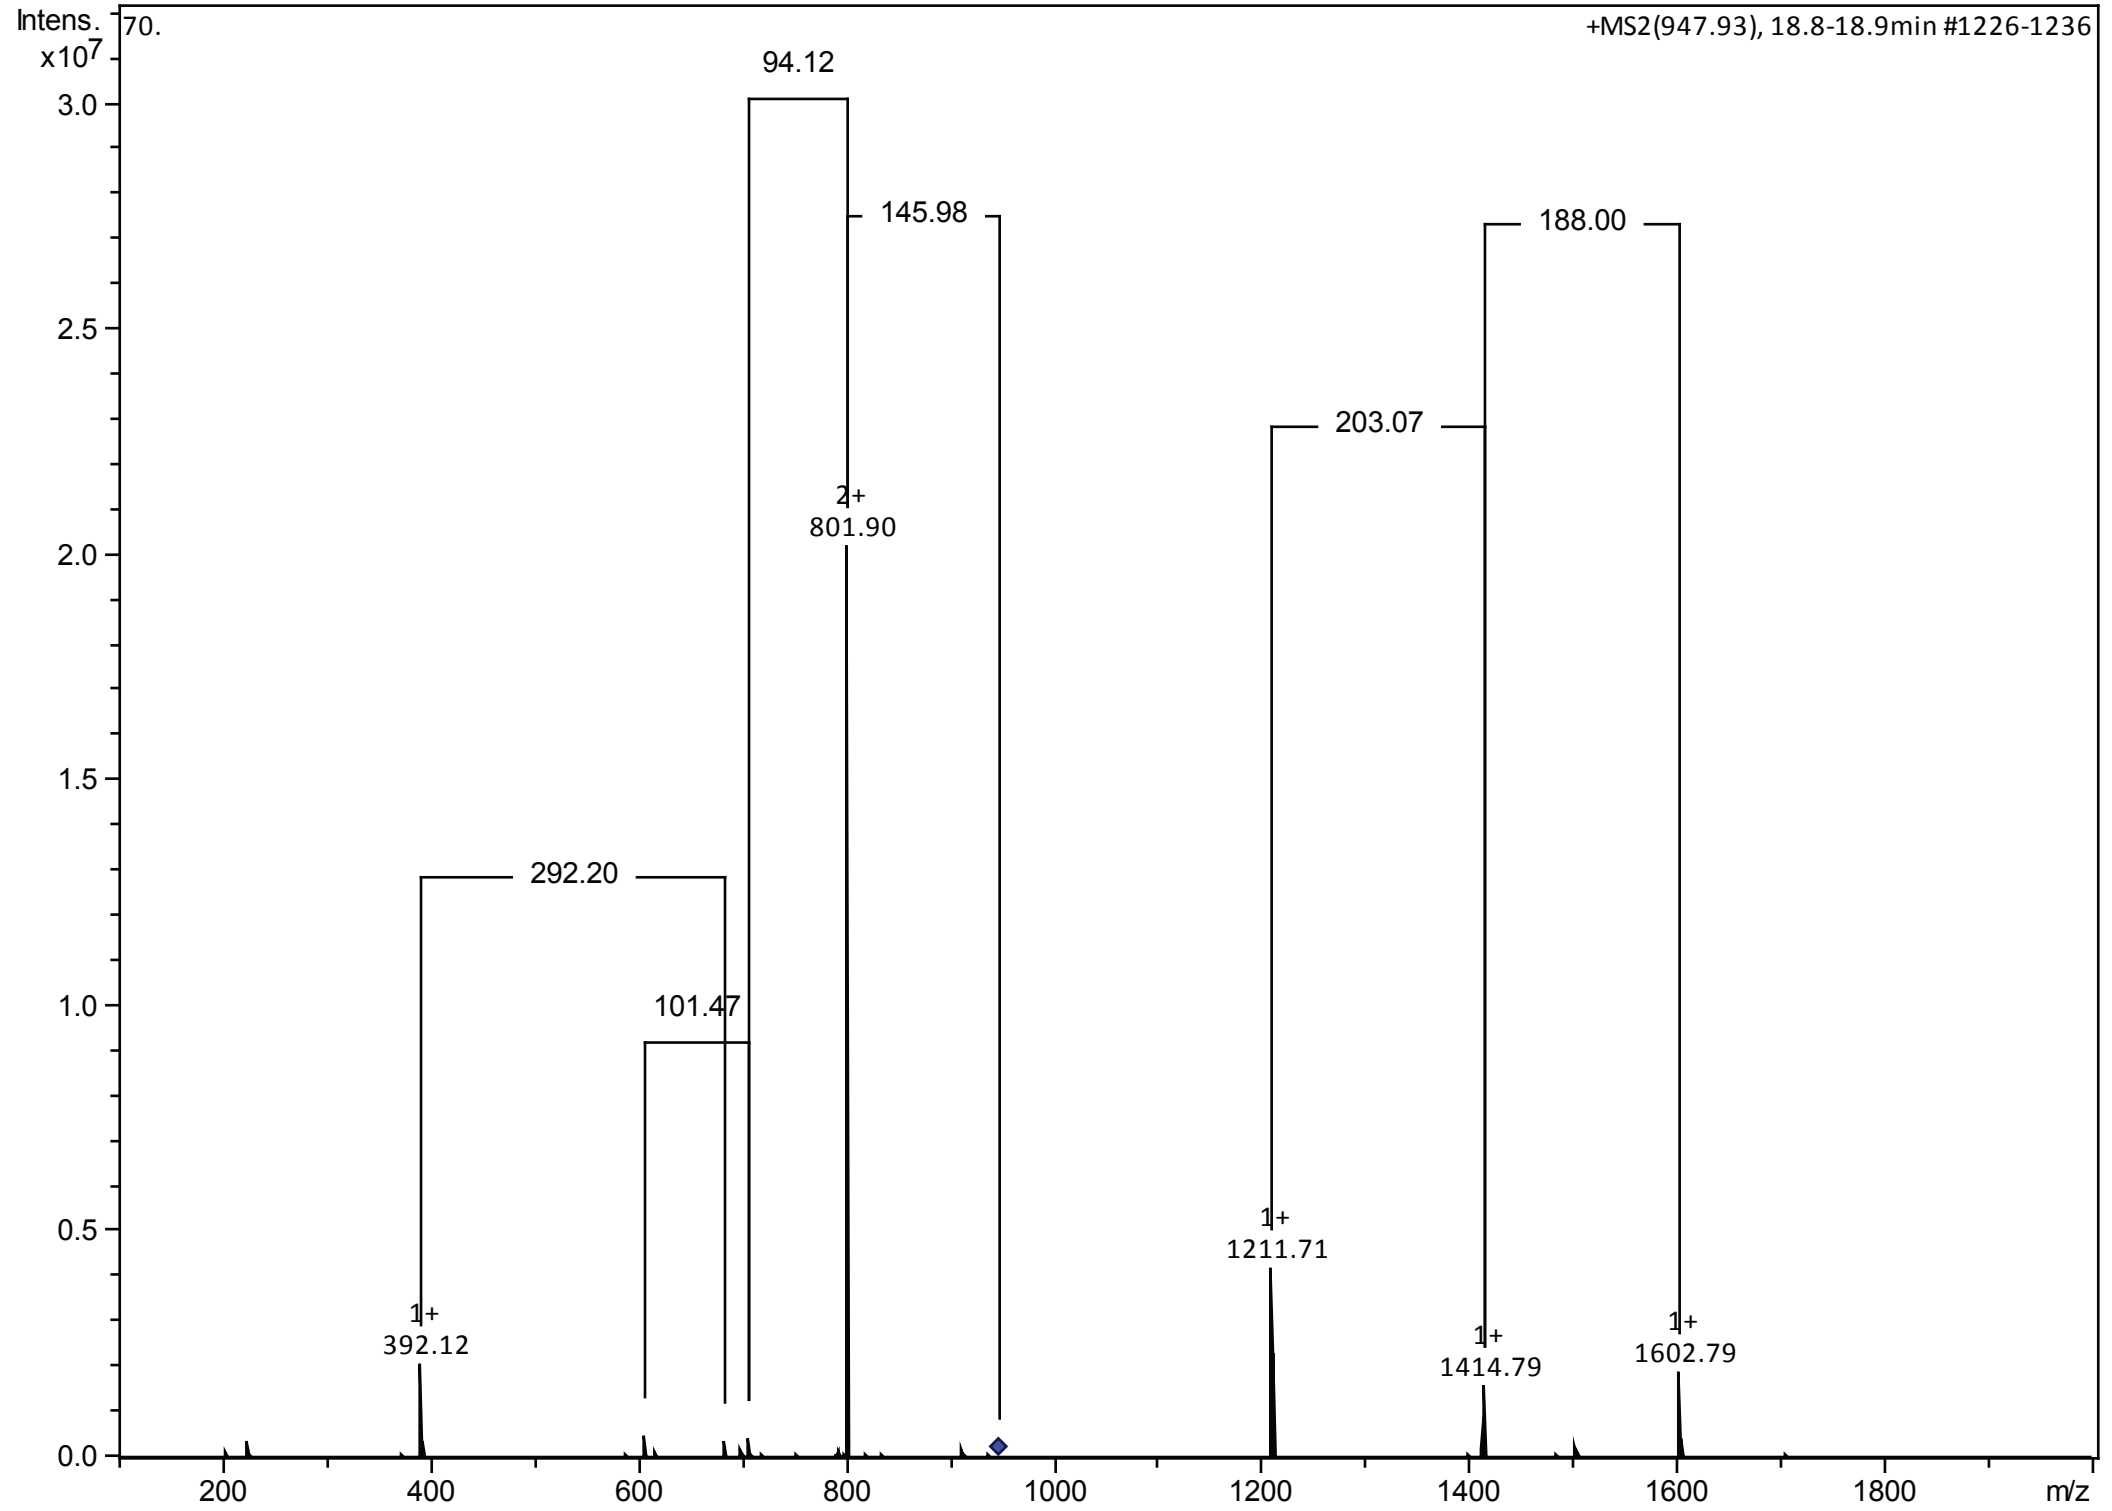

CID

+MS2(947.93), 18.8-18.9min #1226-1236

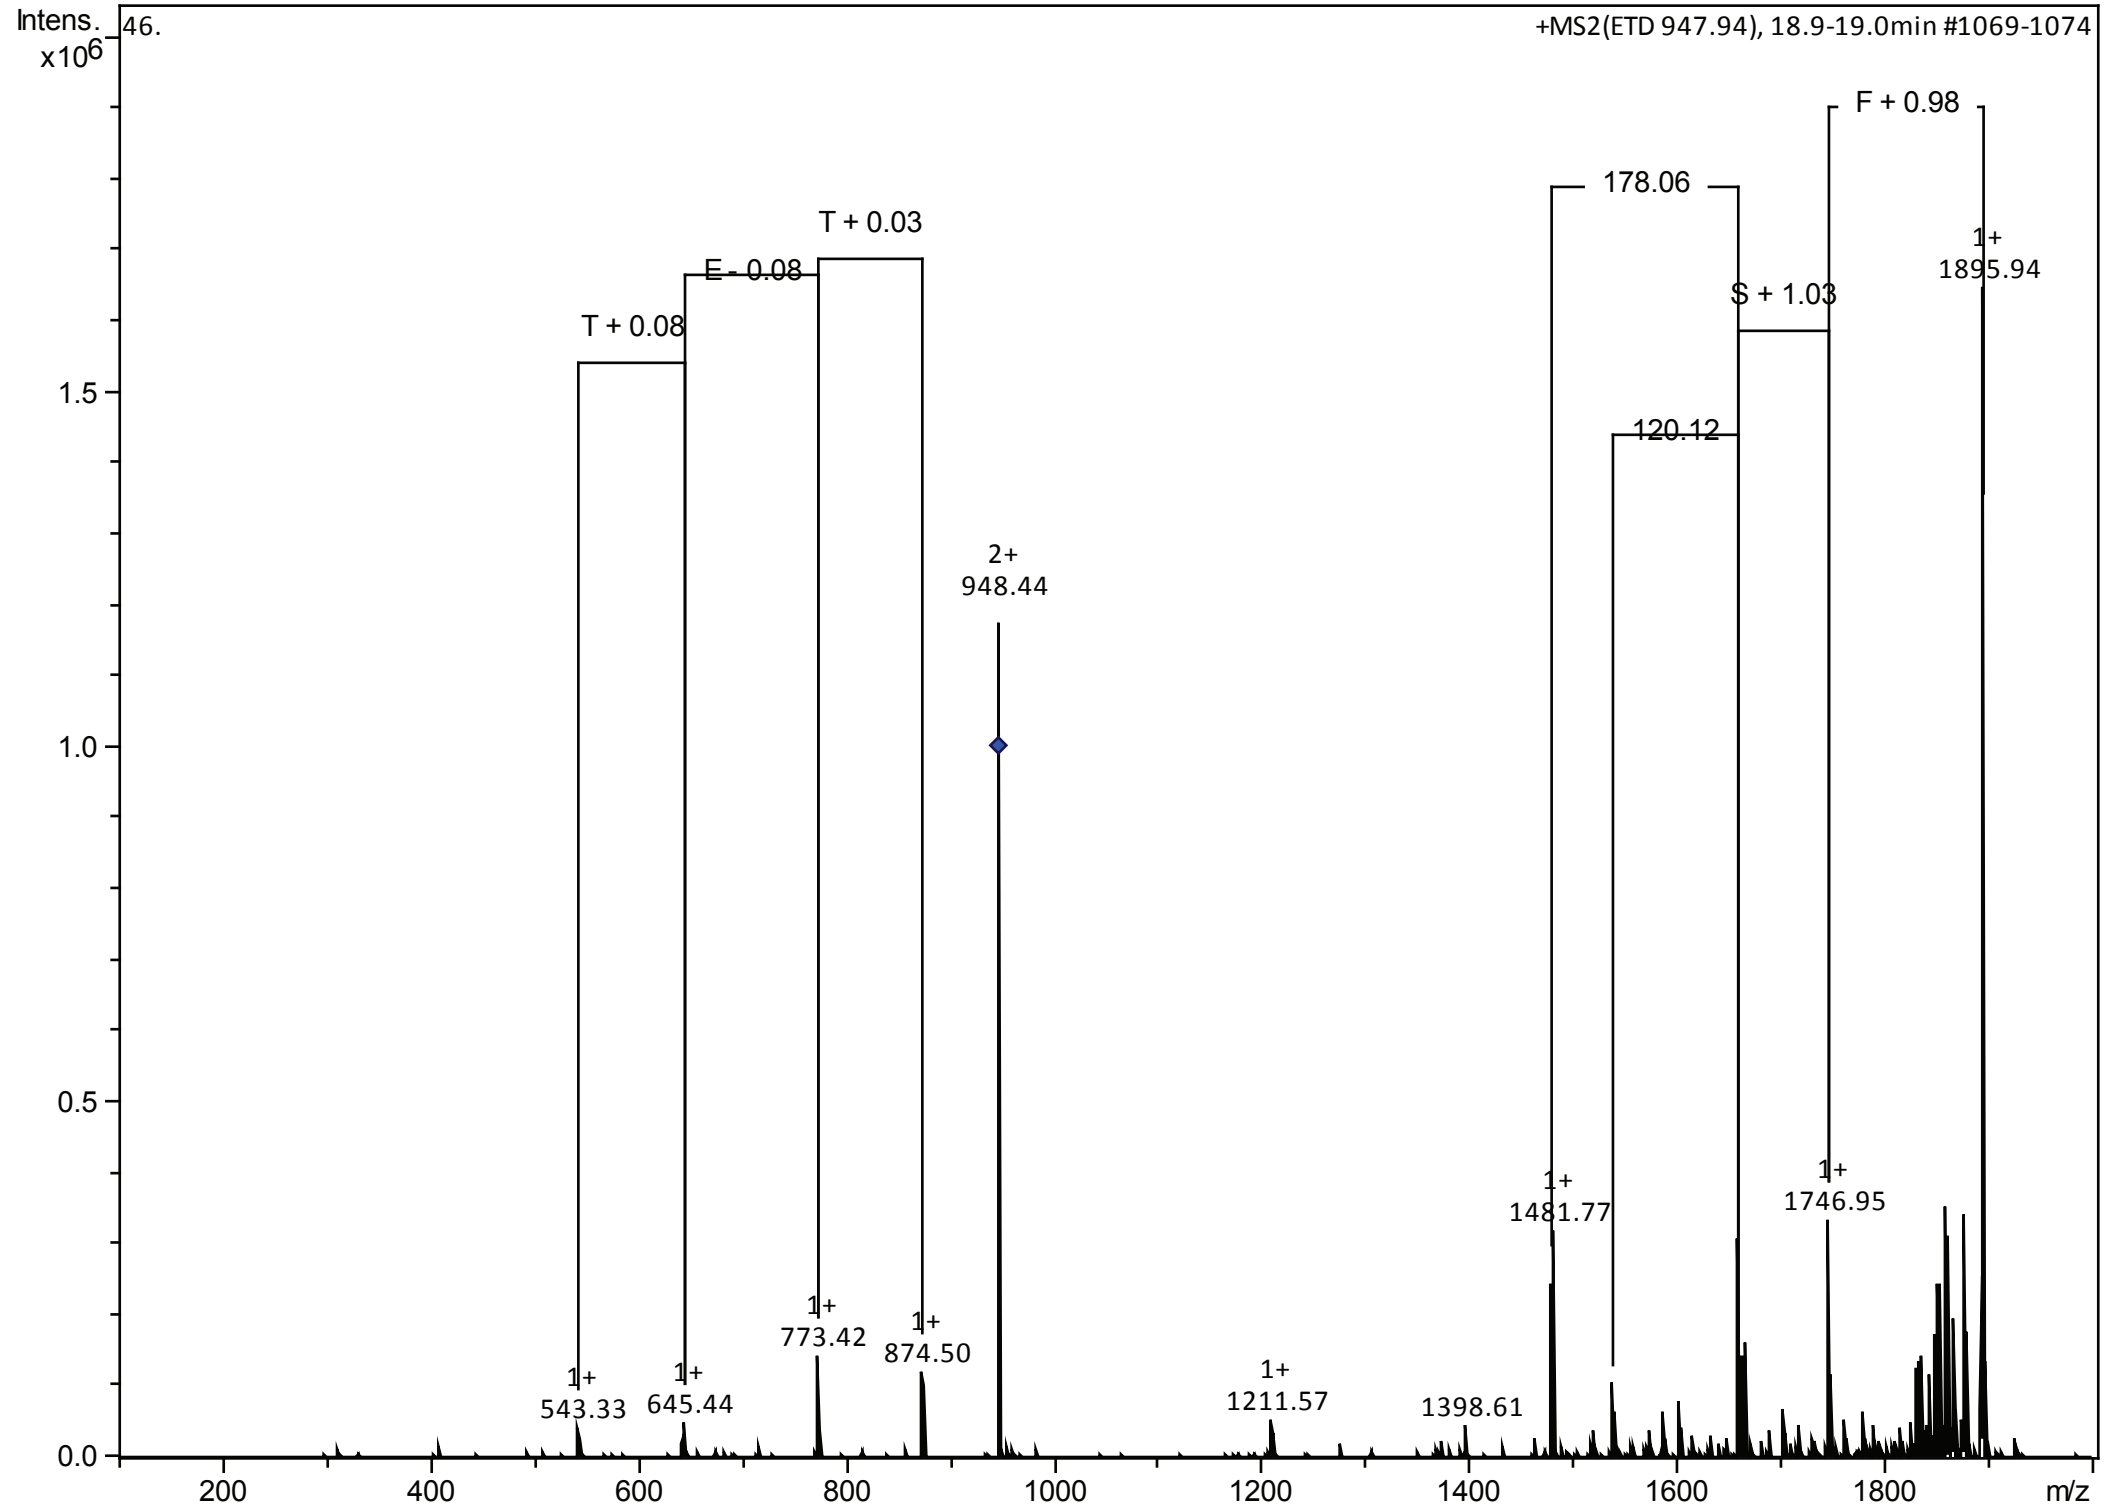

ETD

J  
CID

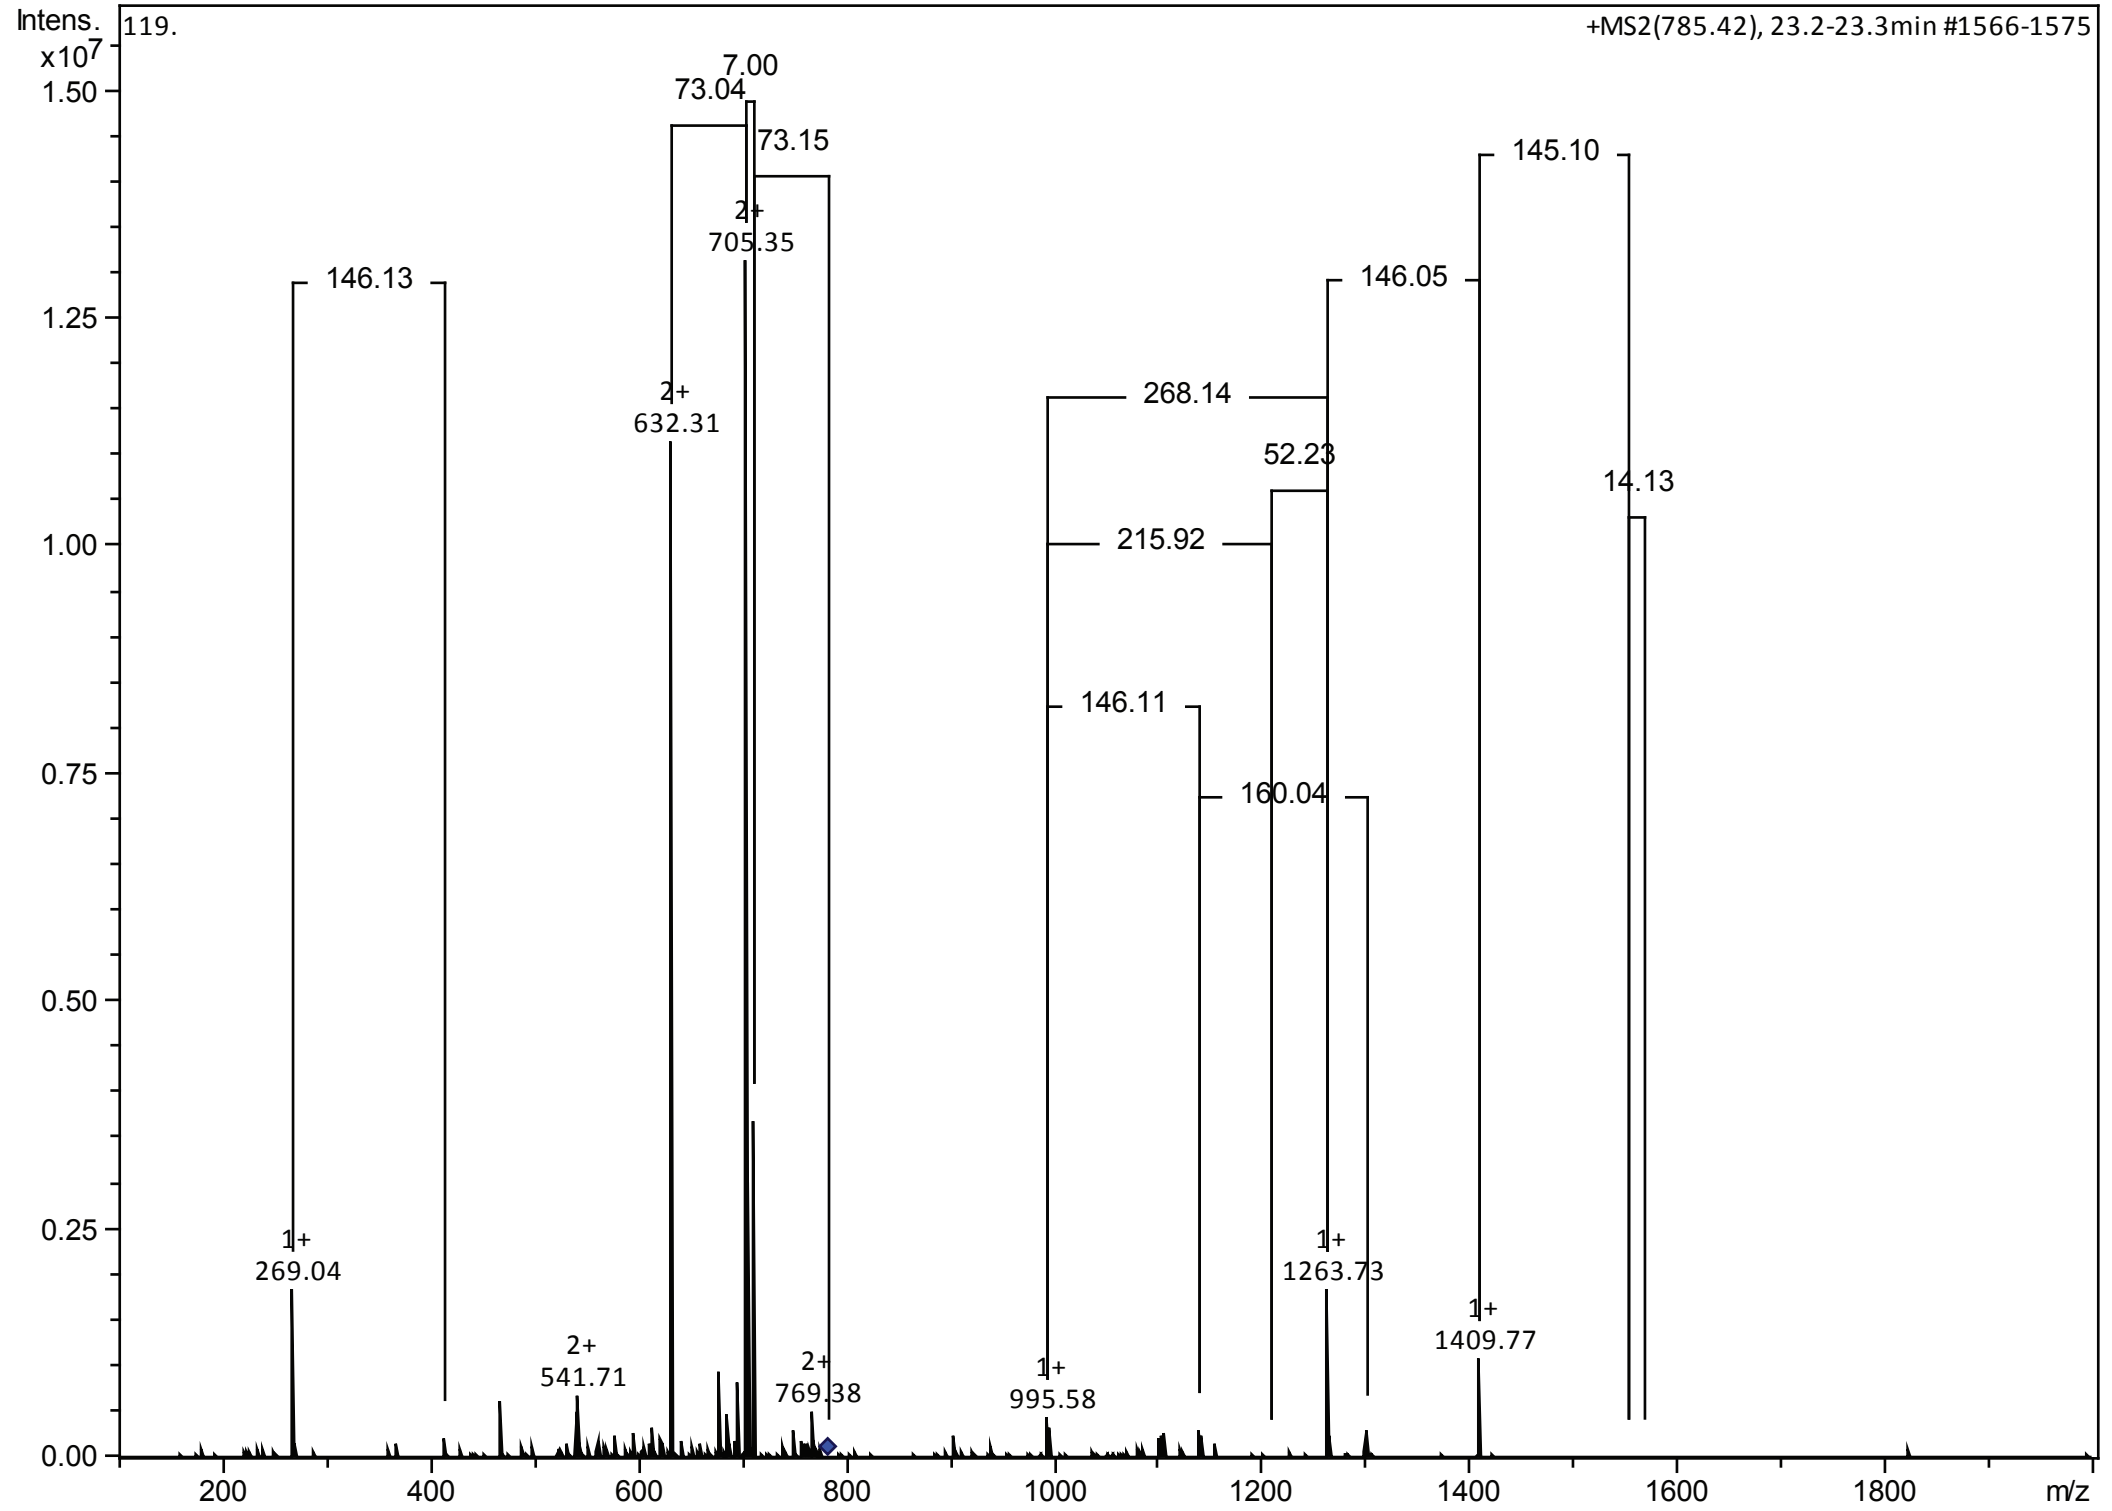

+MS2(785.42), 23.2-23.3min #1566-1575

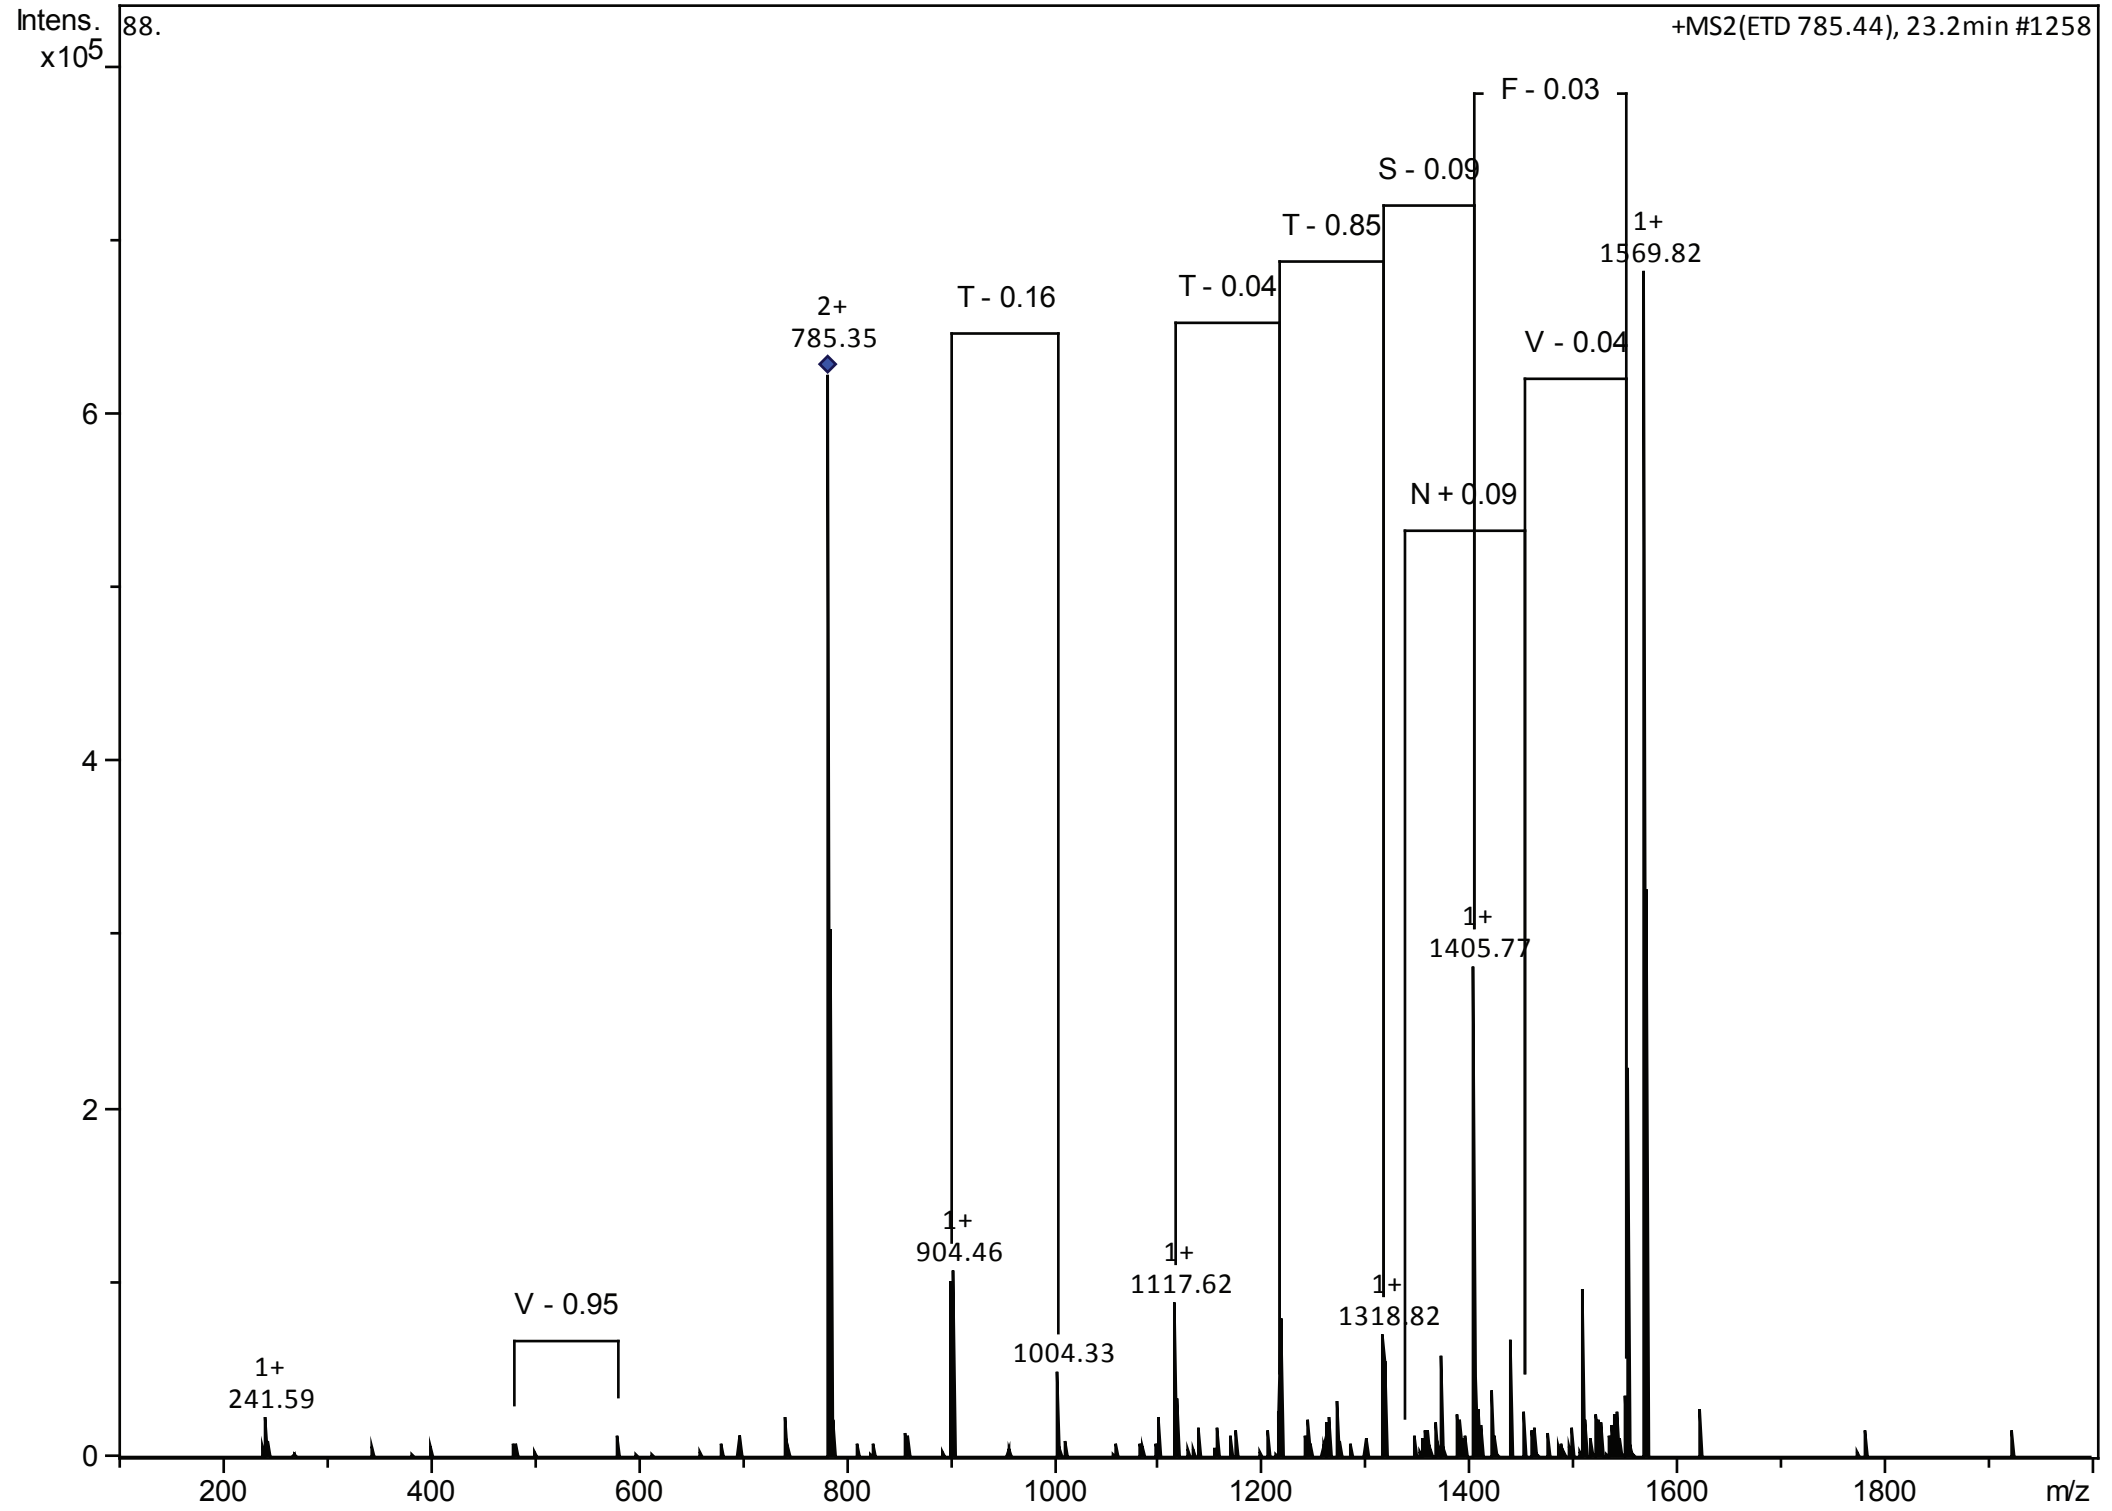

J  
ETD

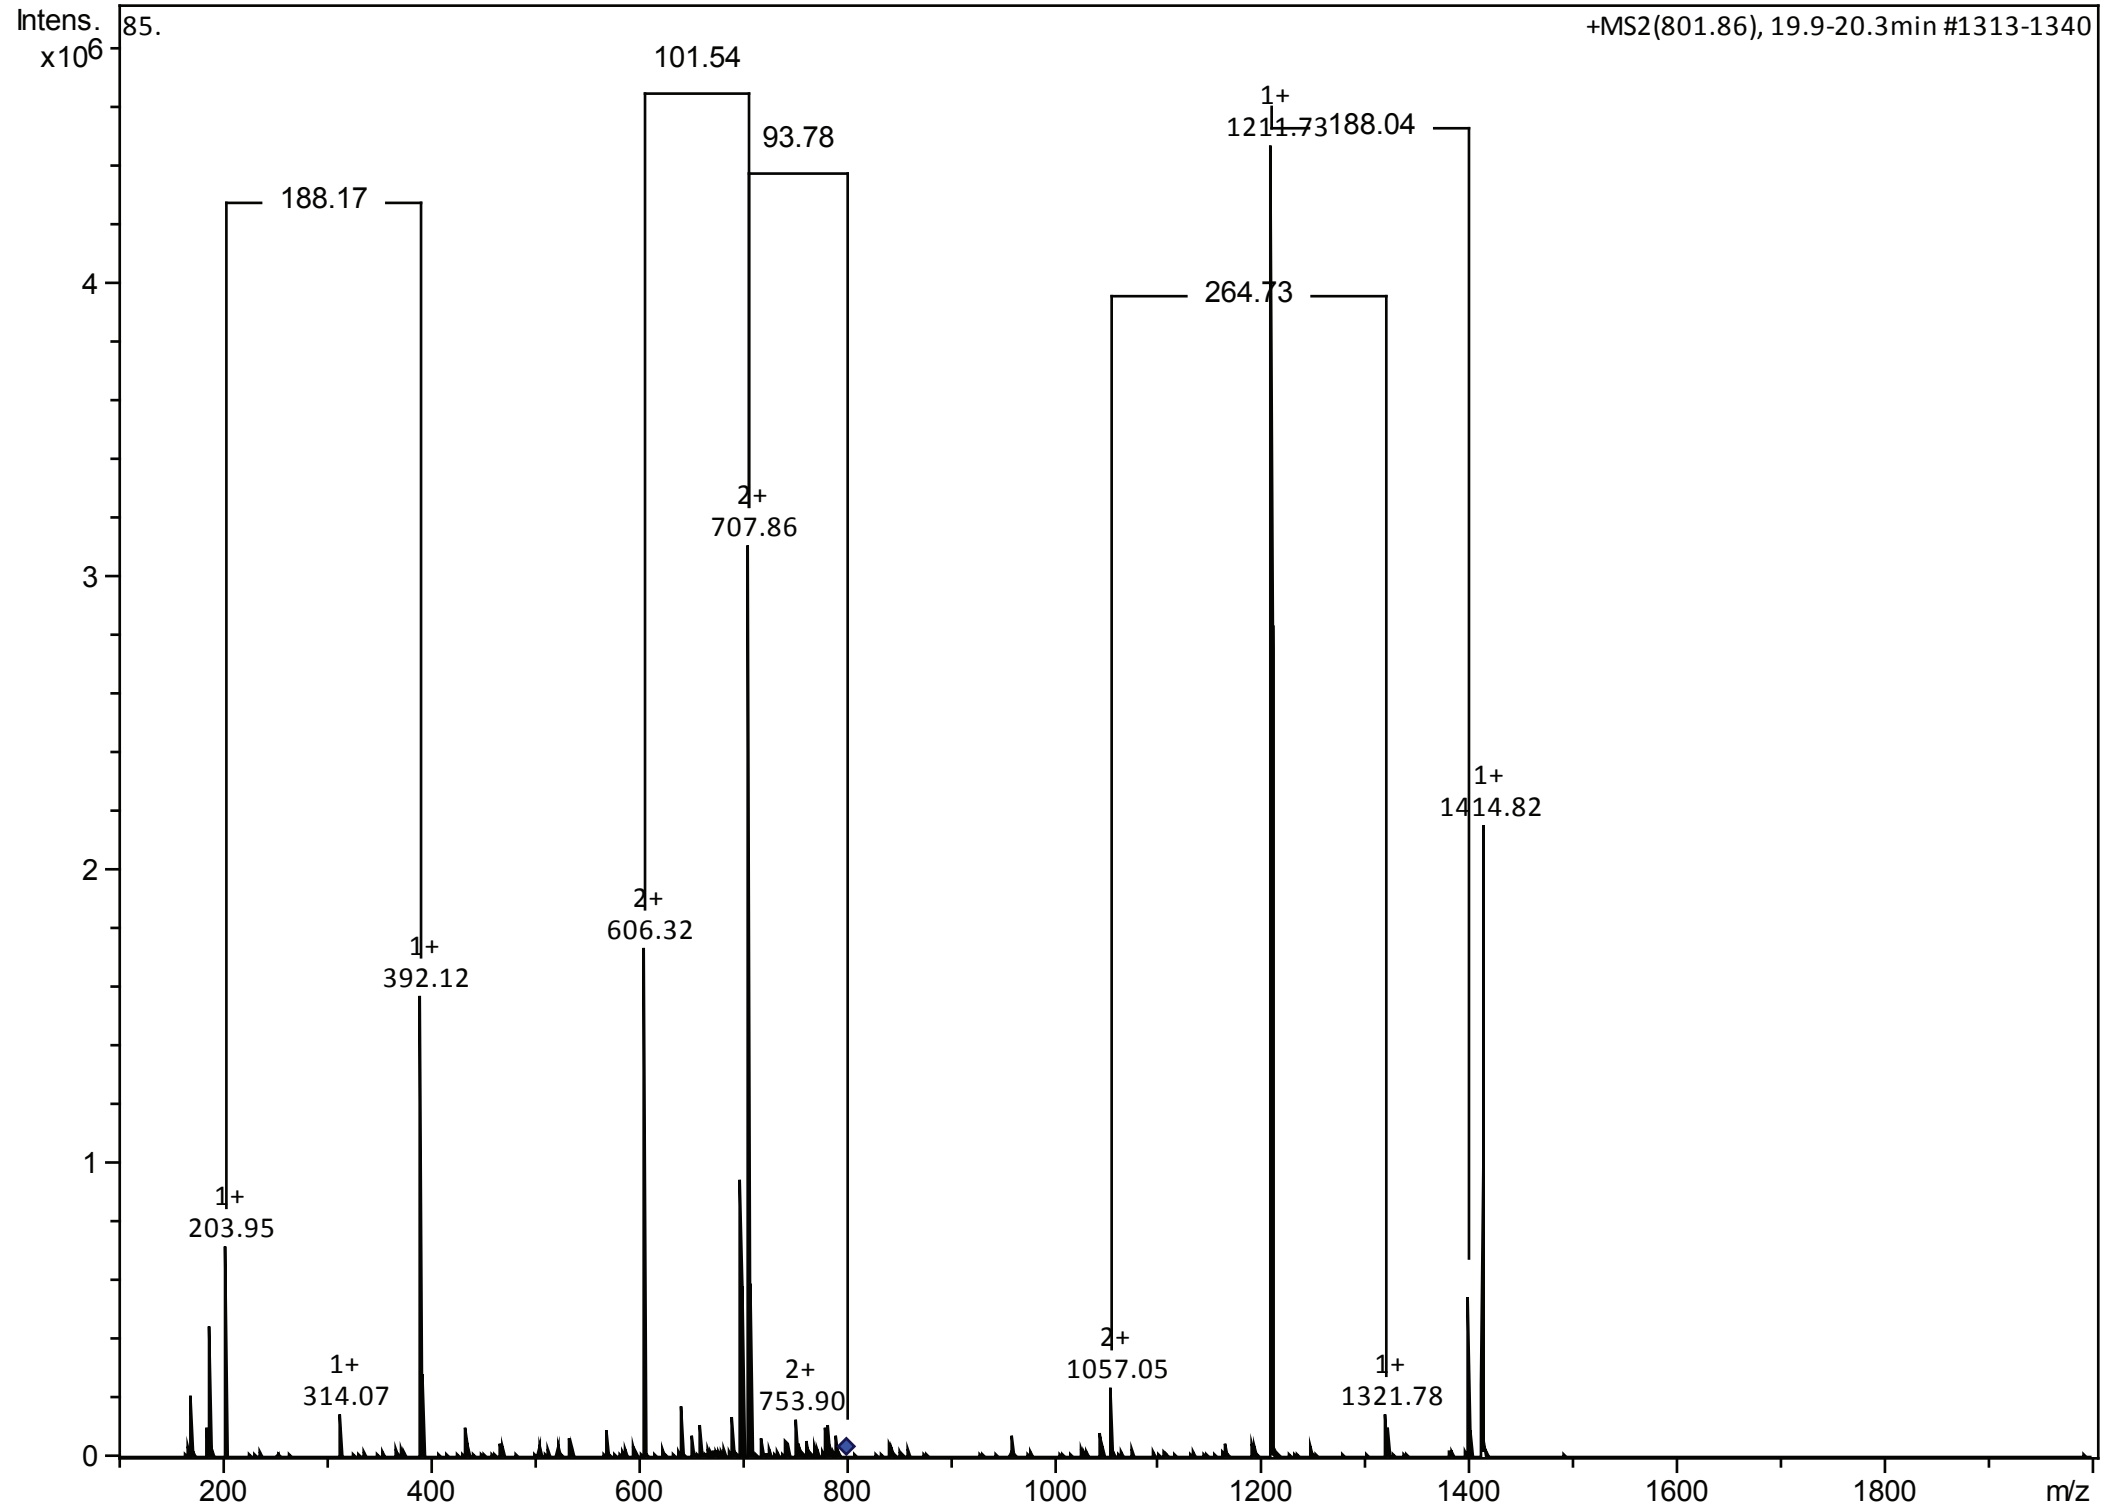

K  
CID

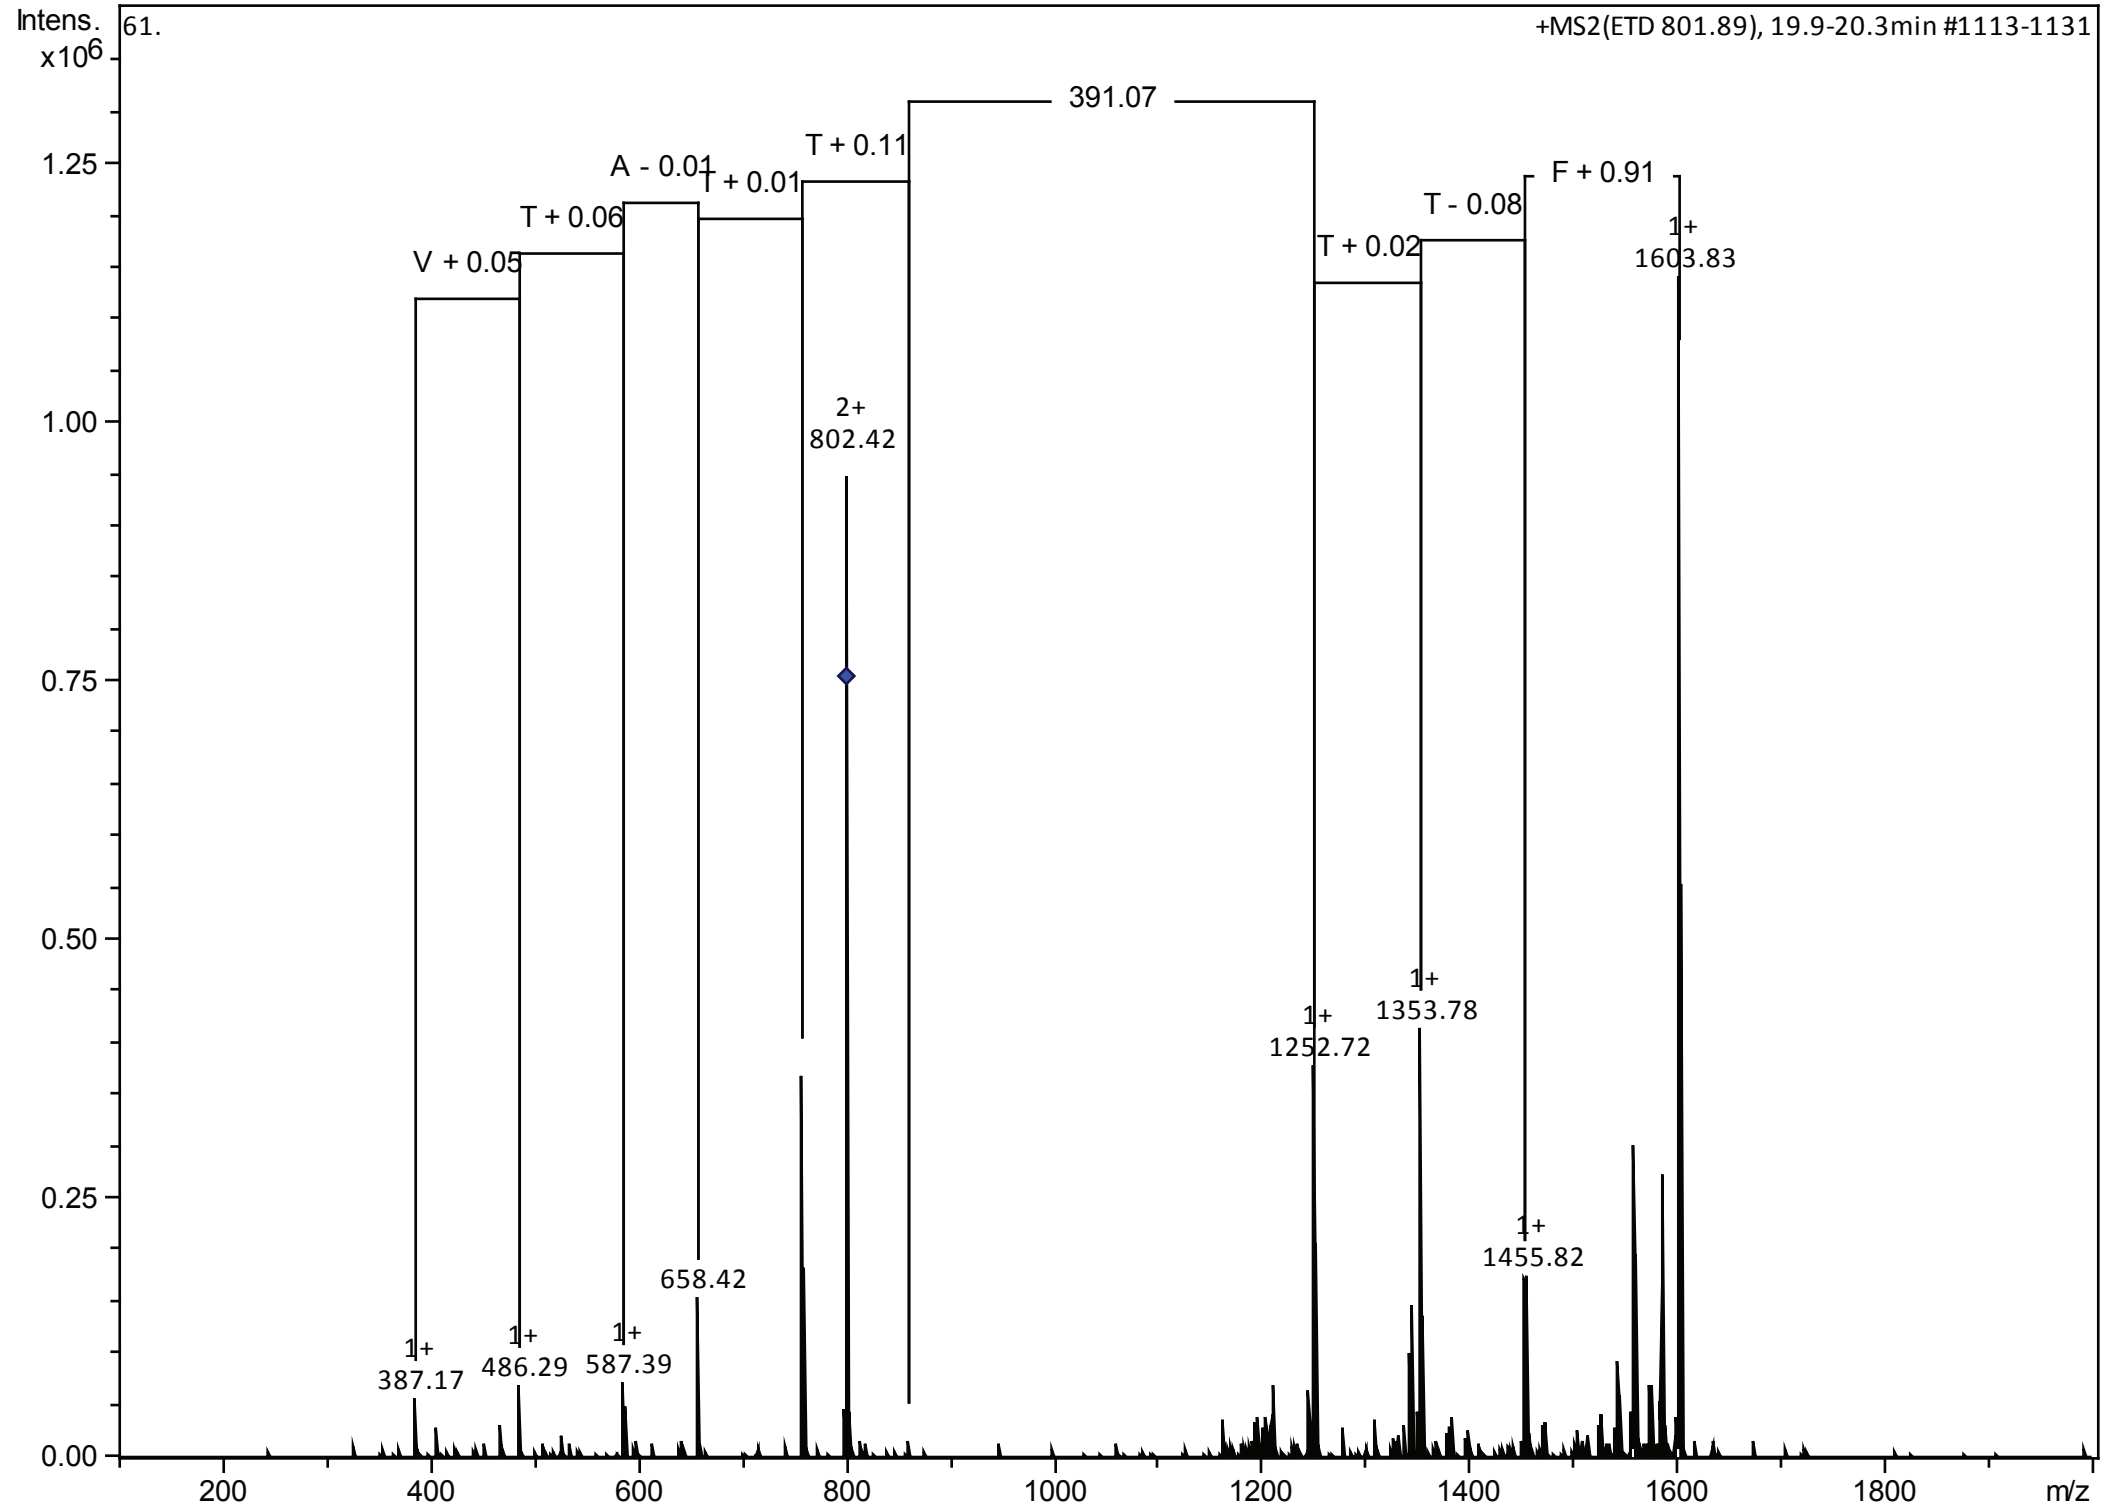

**K**  
ETD

+MS2(ETD 801.89), 19.9-20.3min #1113-1131

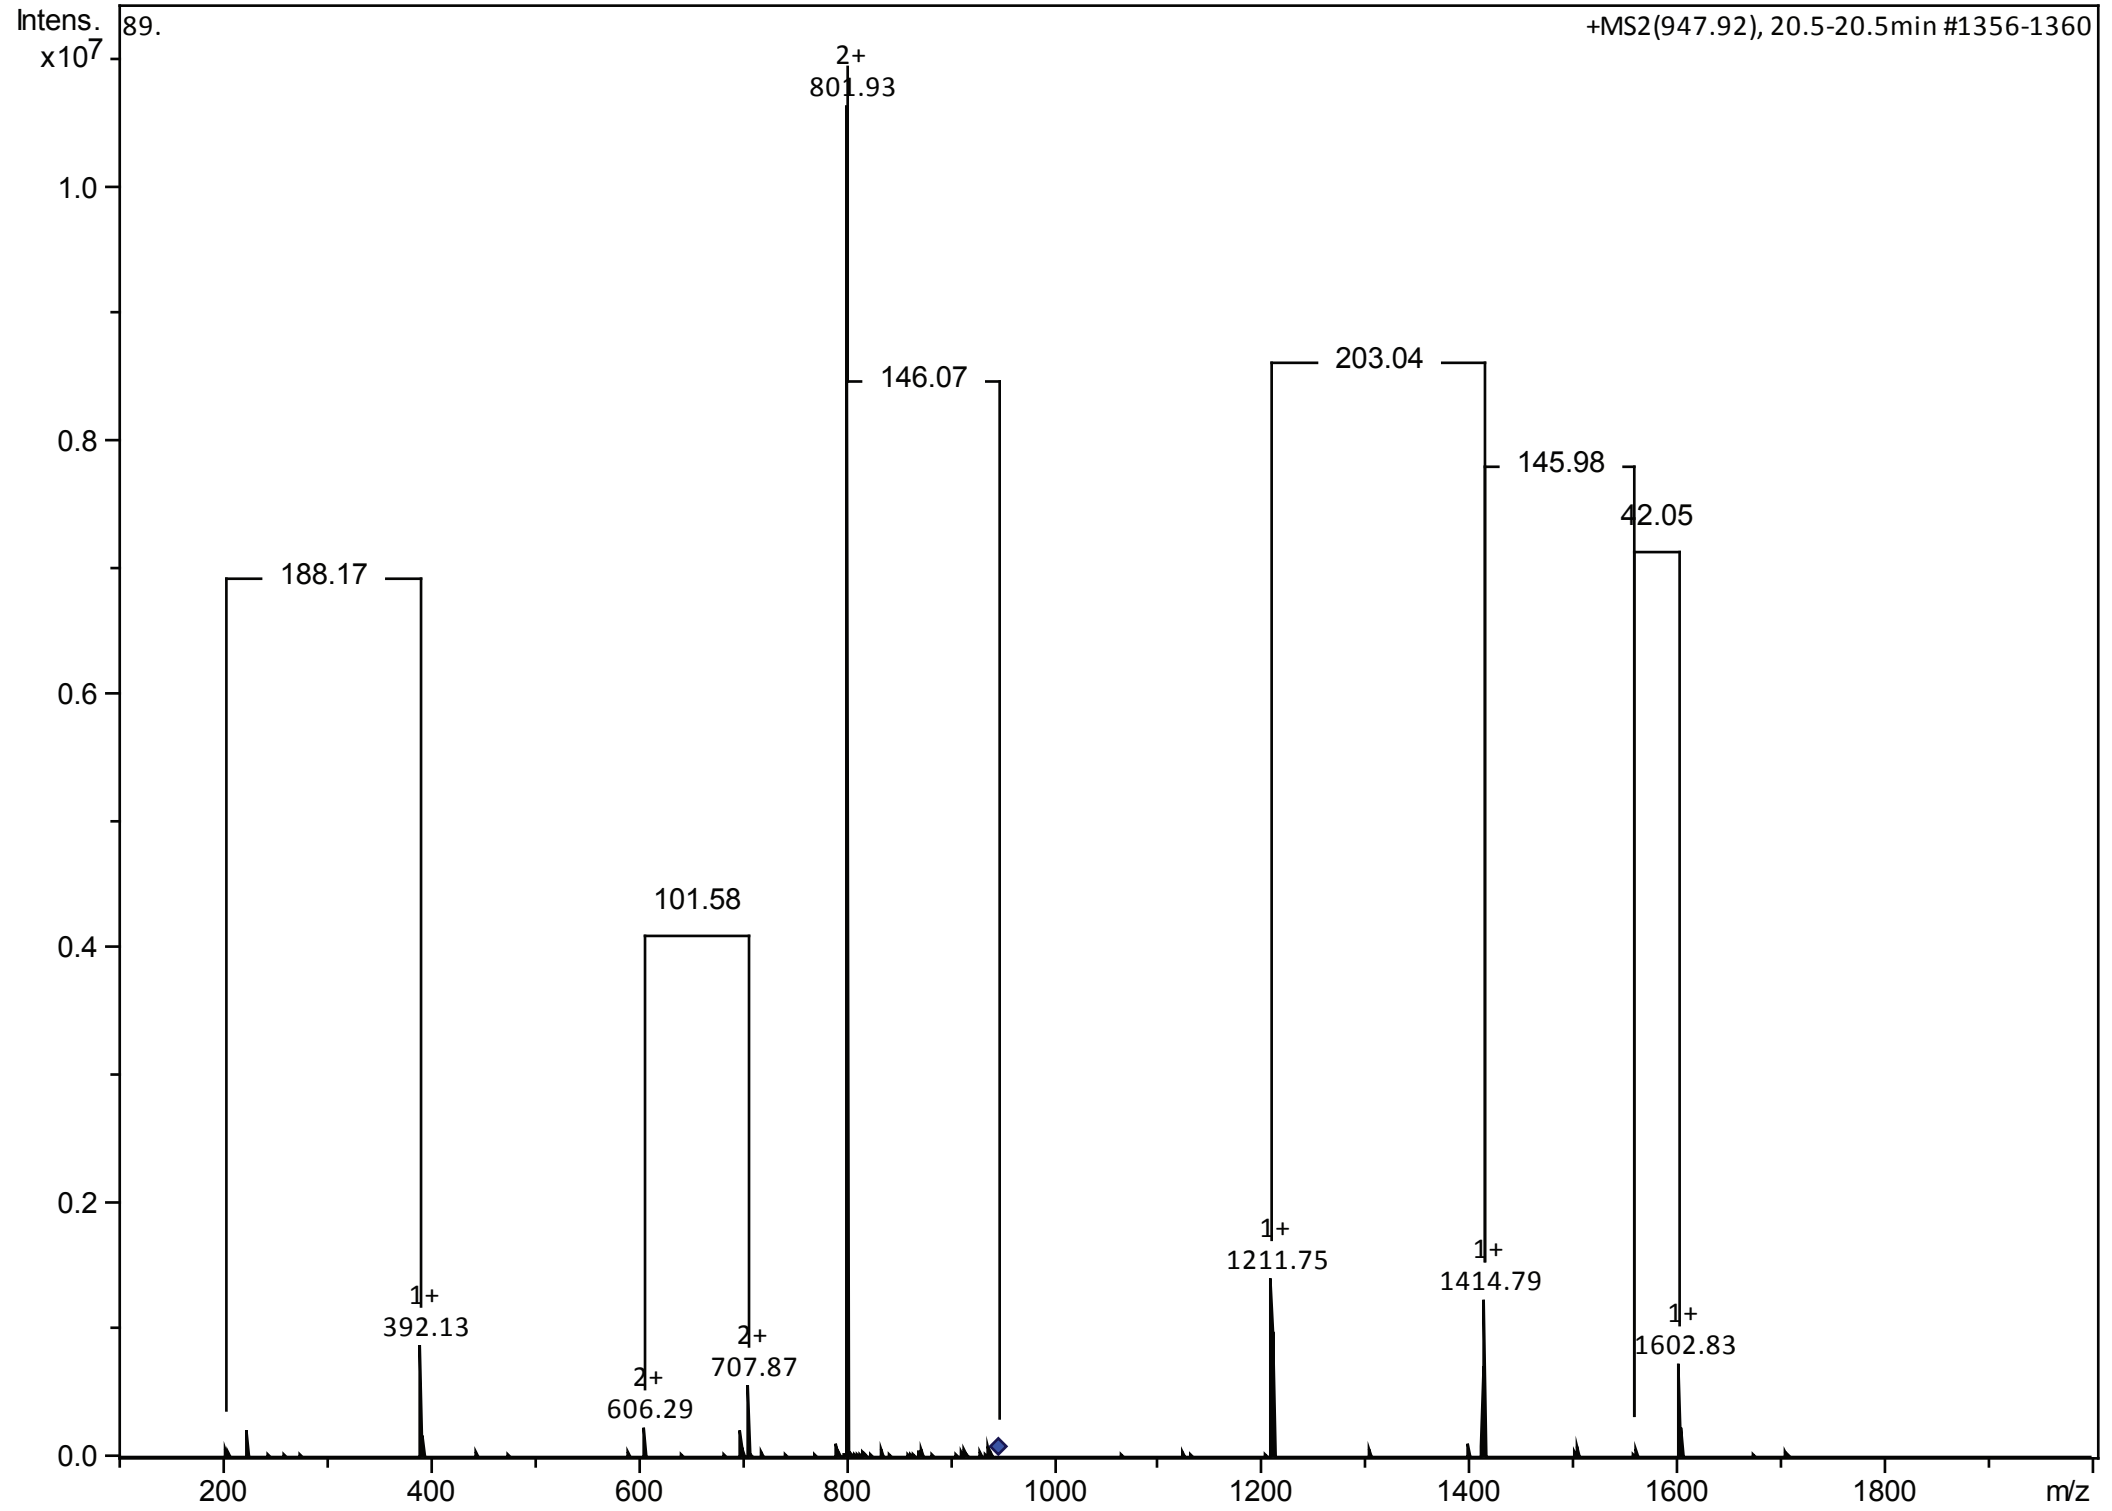

L  
CID

+MS2(947.92), 20.5-20.5min #1356-1360

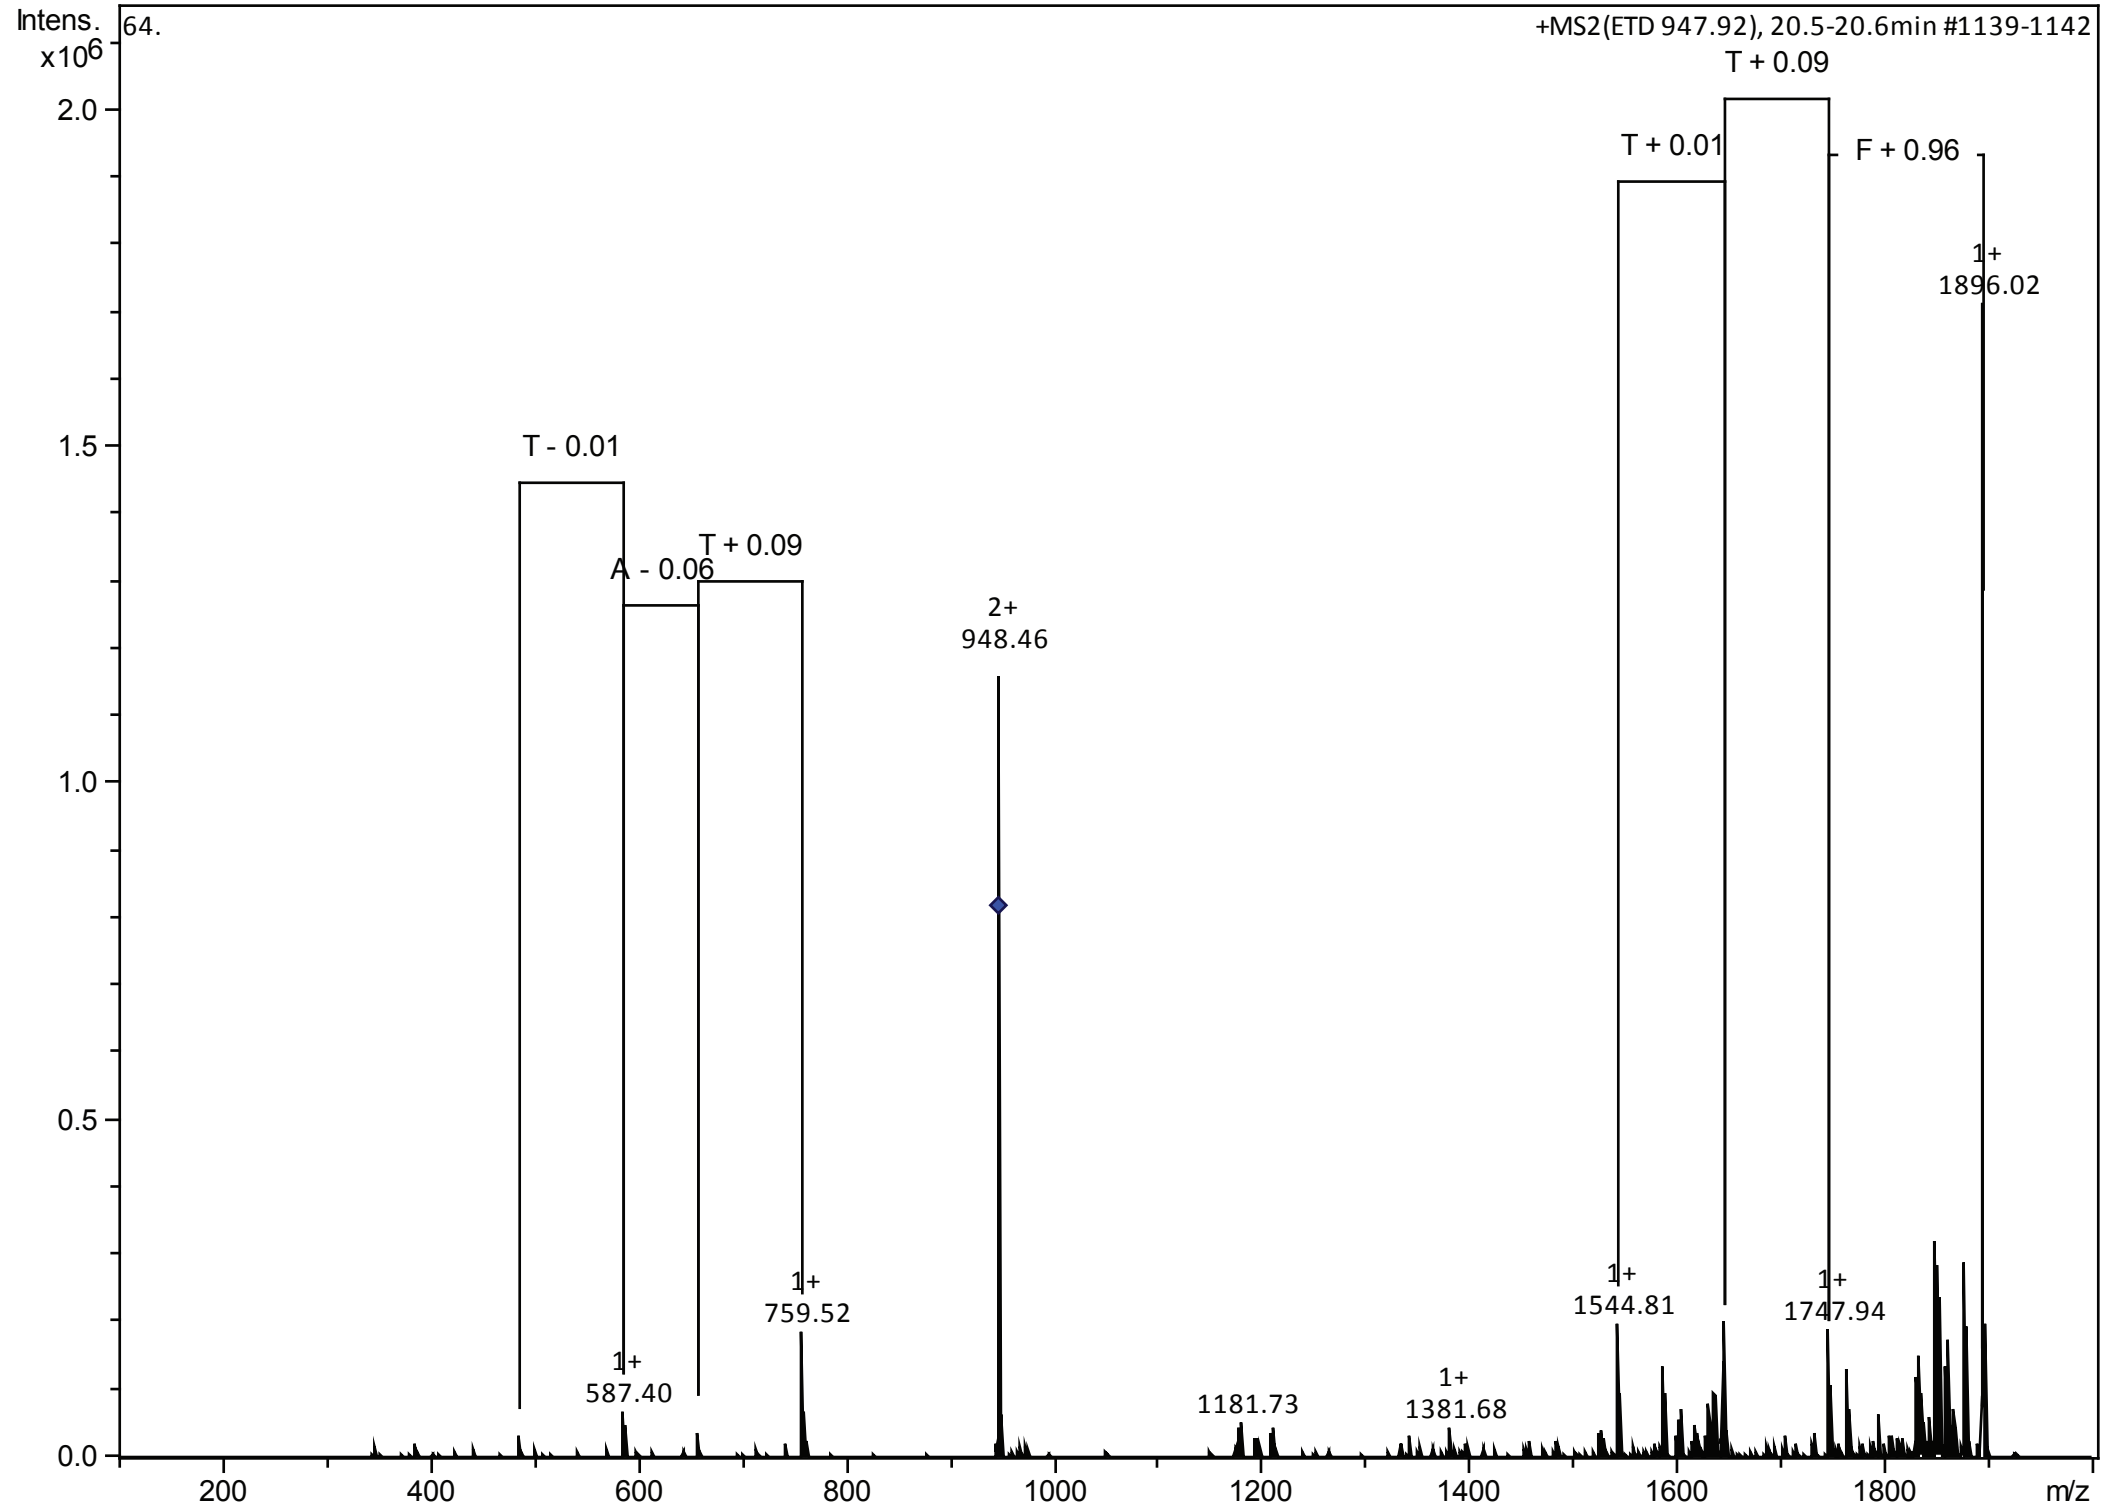



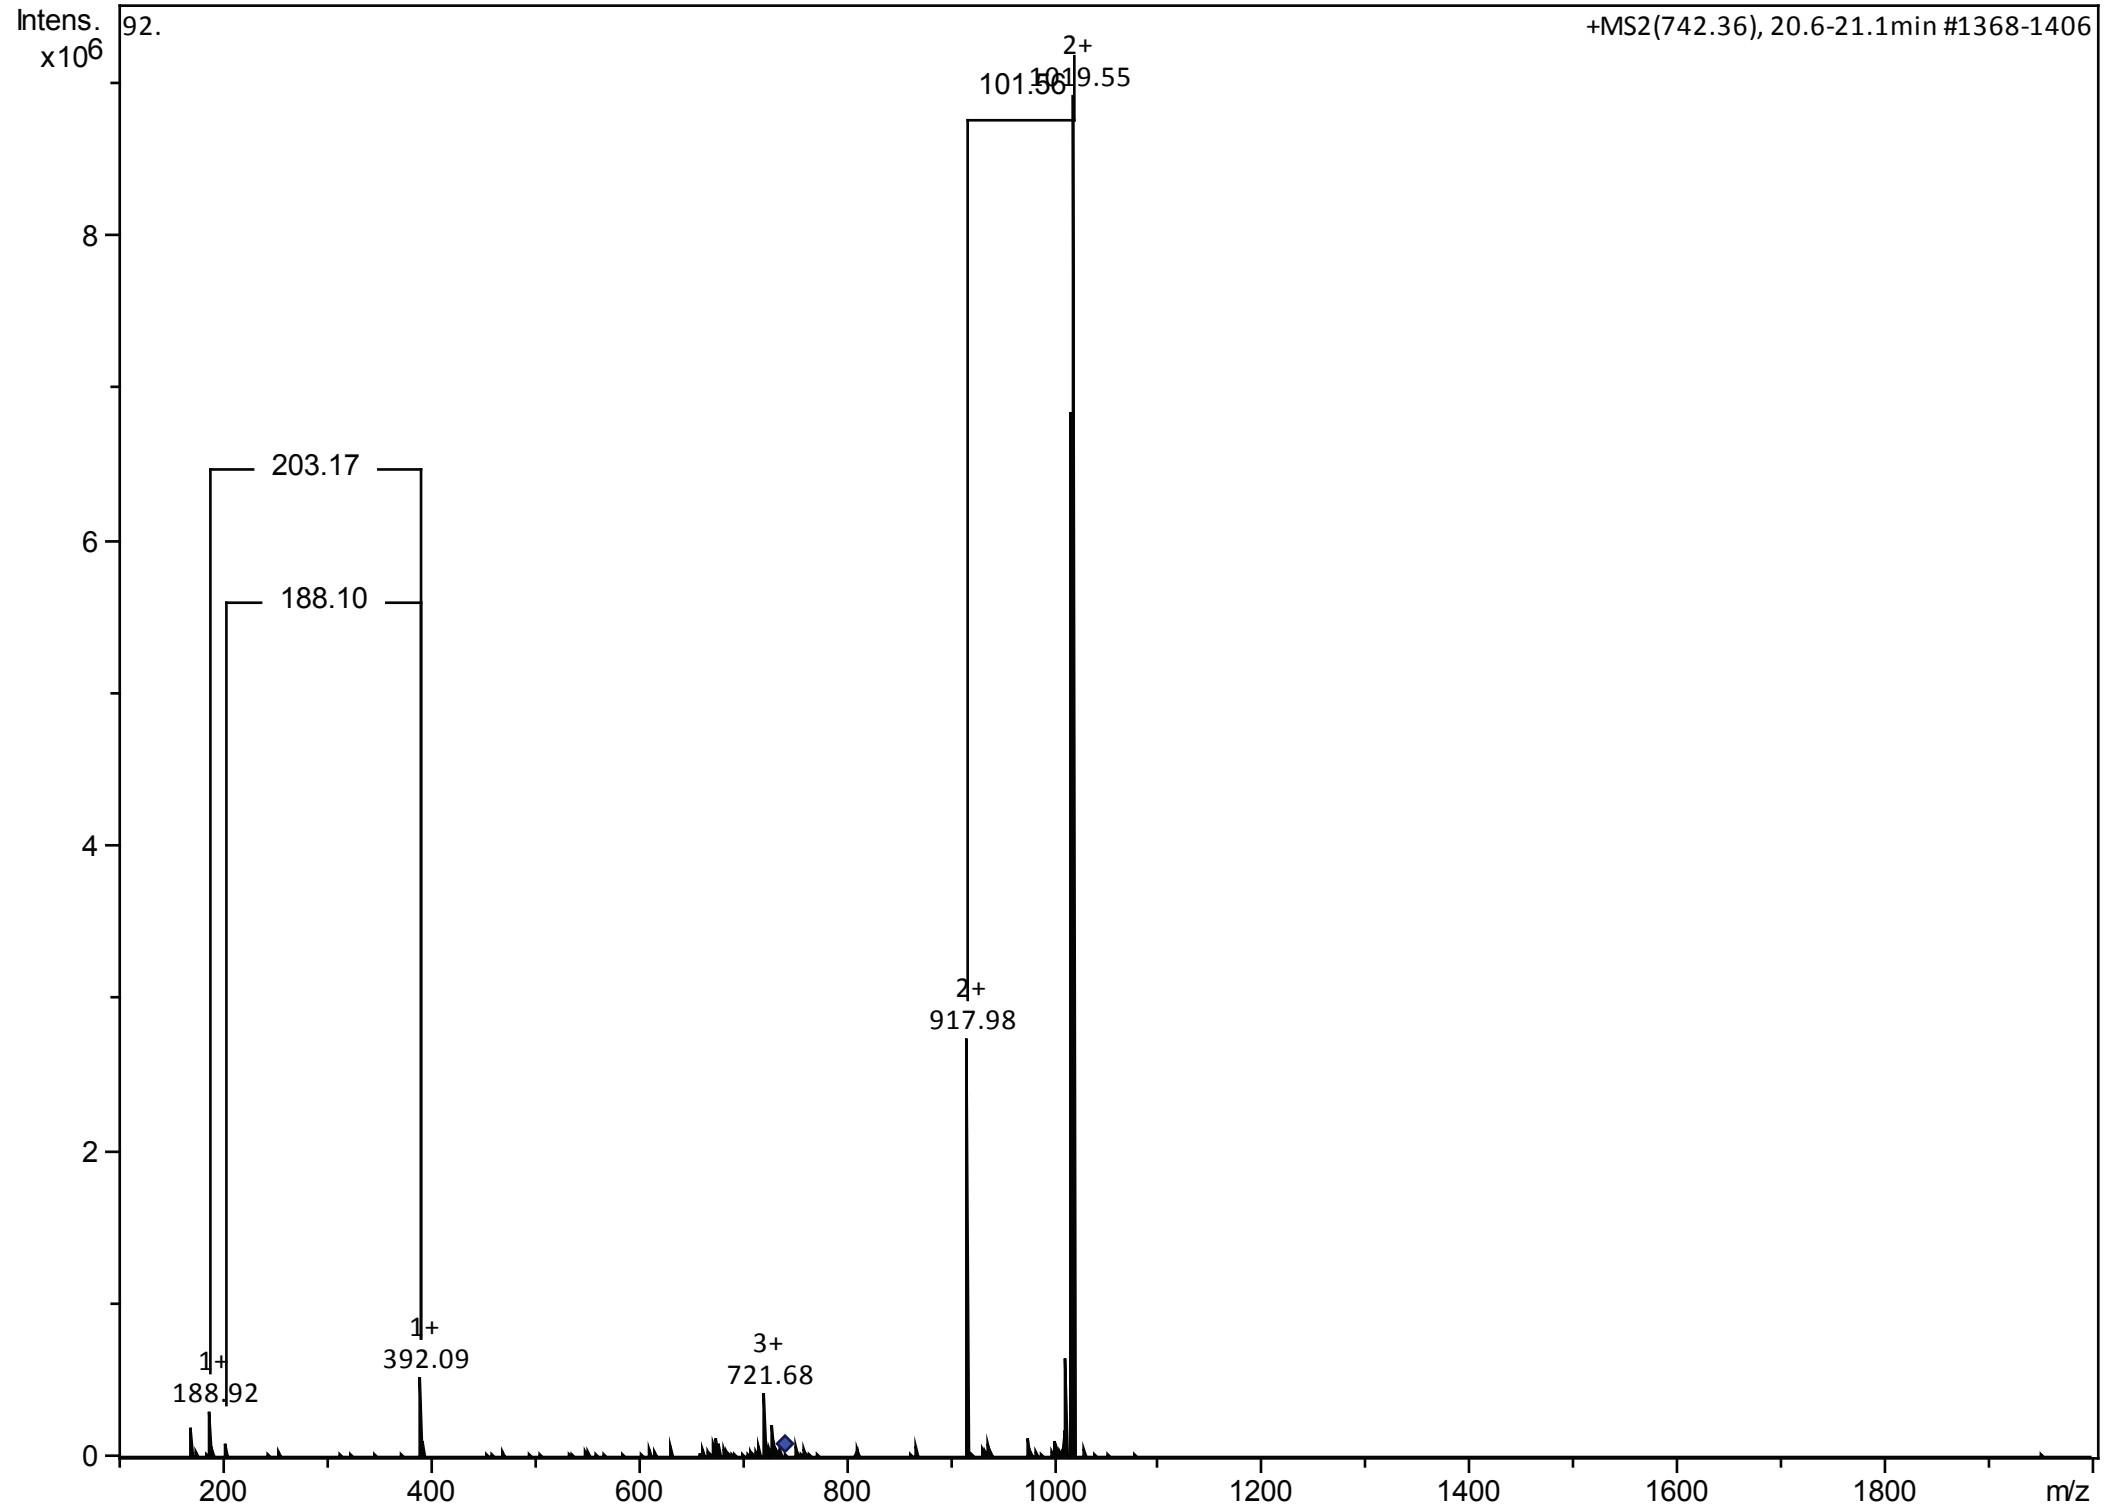

**M**  
CID

**M**  
ETD

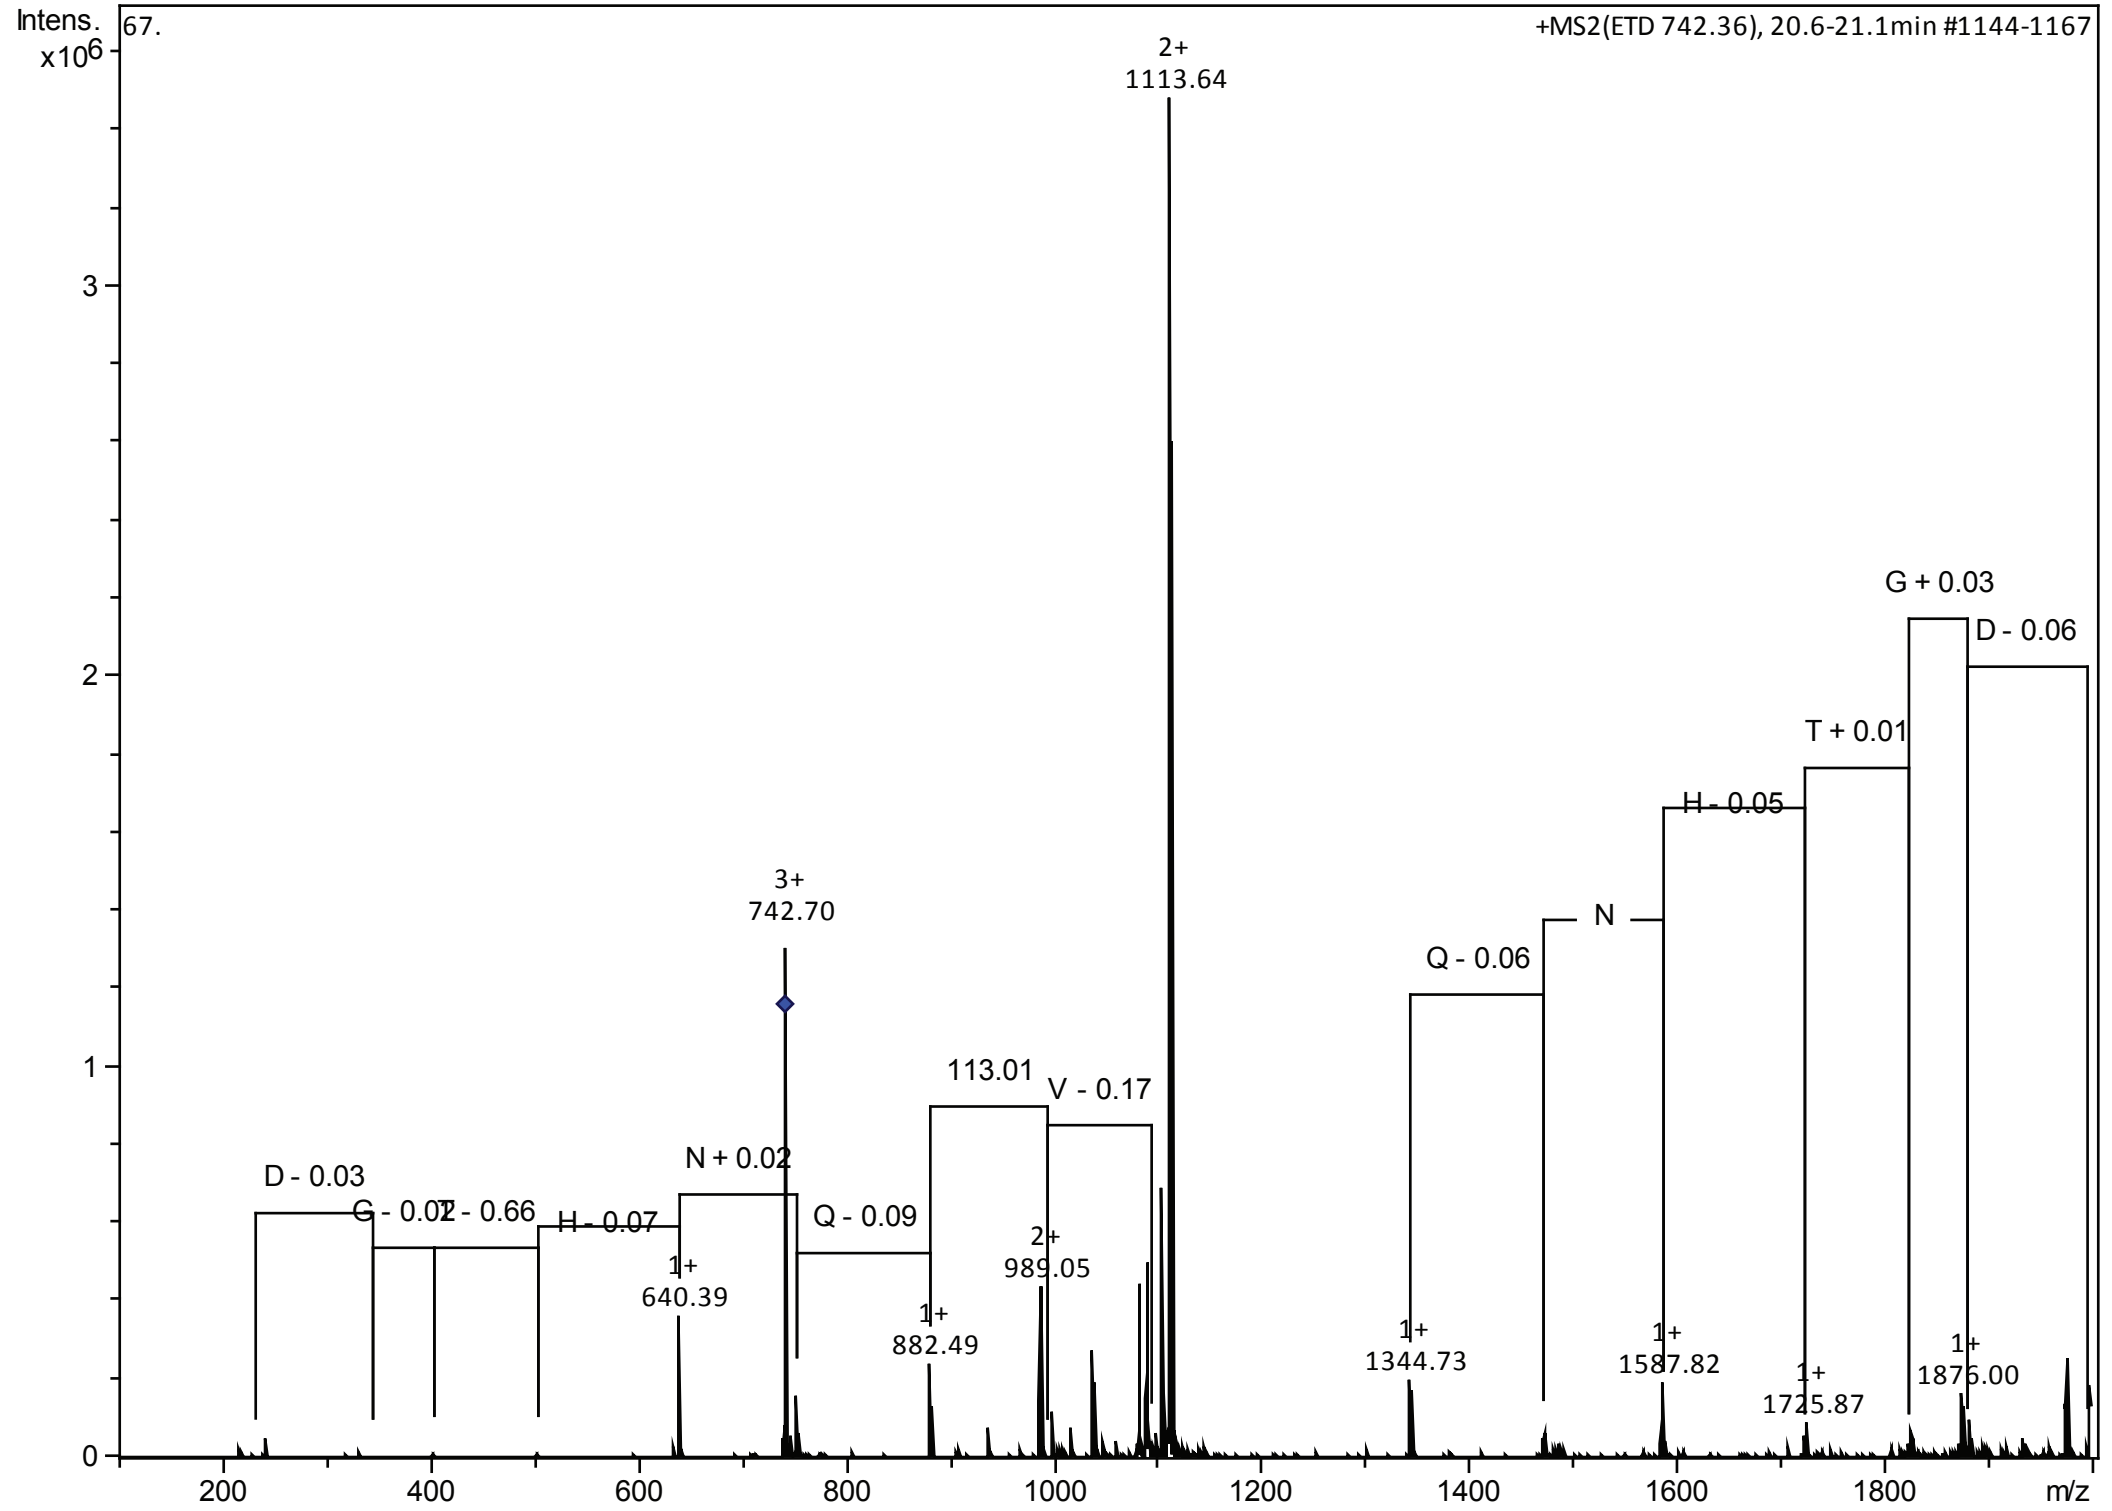

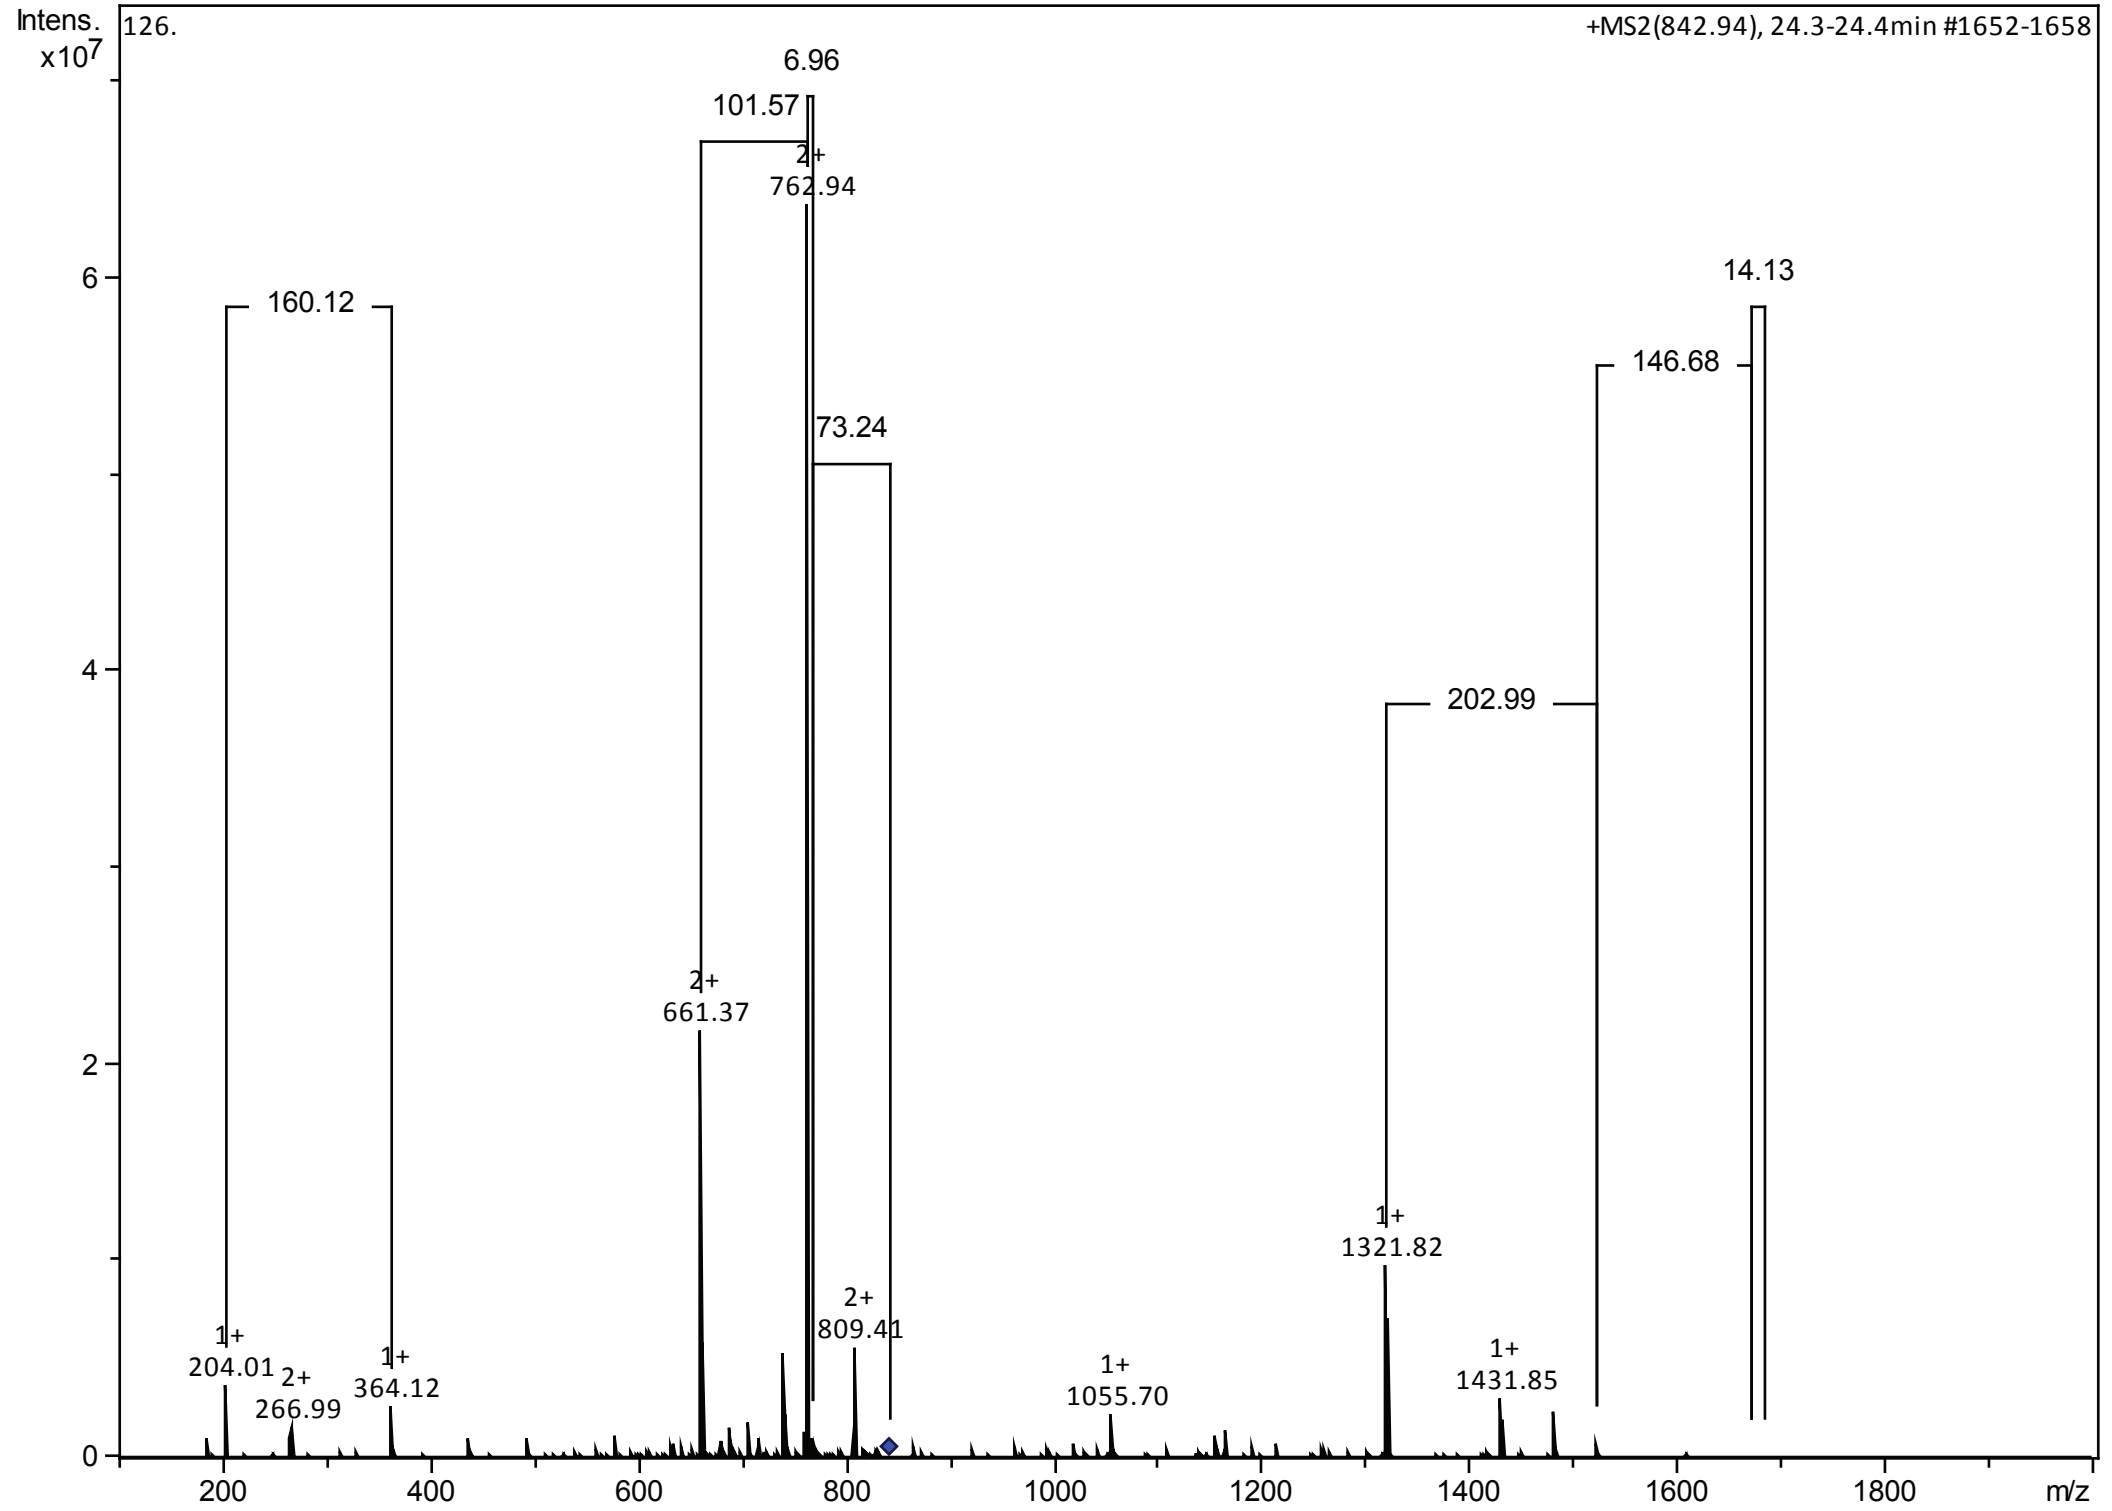

N  
CID

+MS2(842.94), 24.3-24.4min #1652-1658

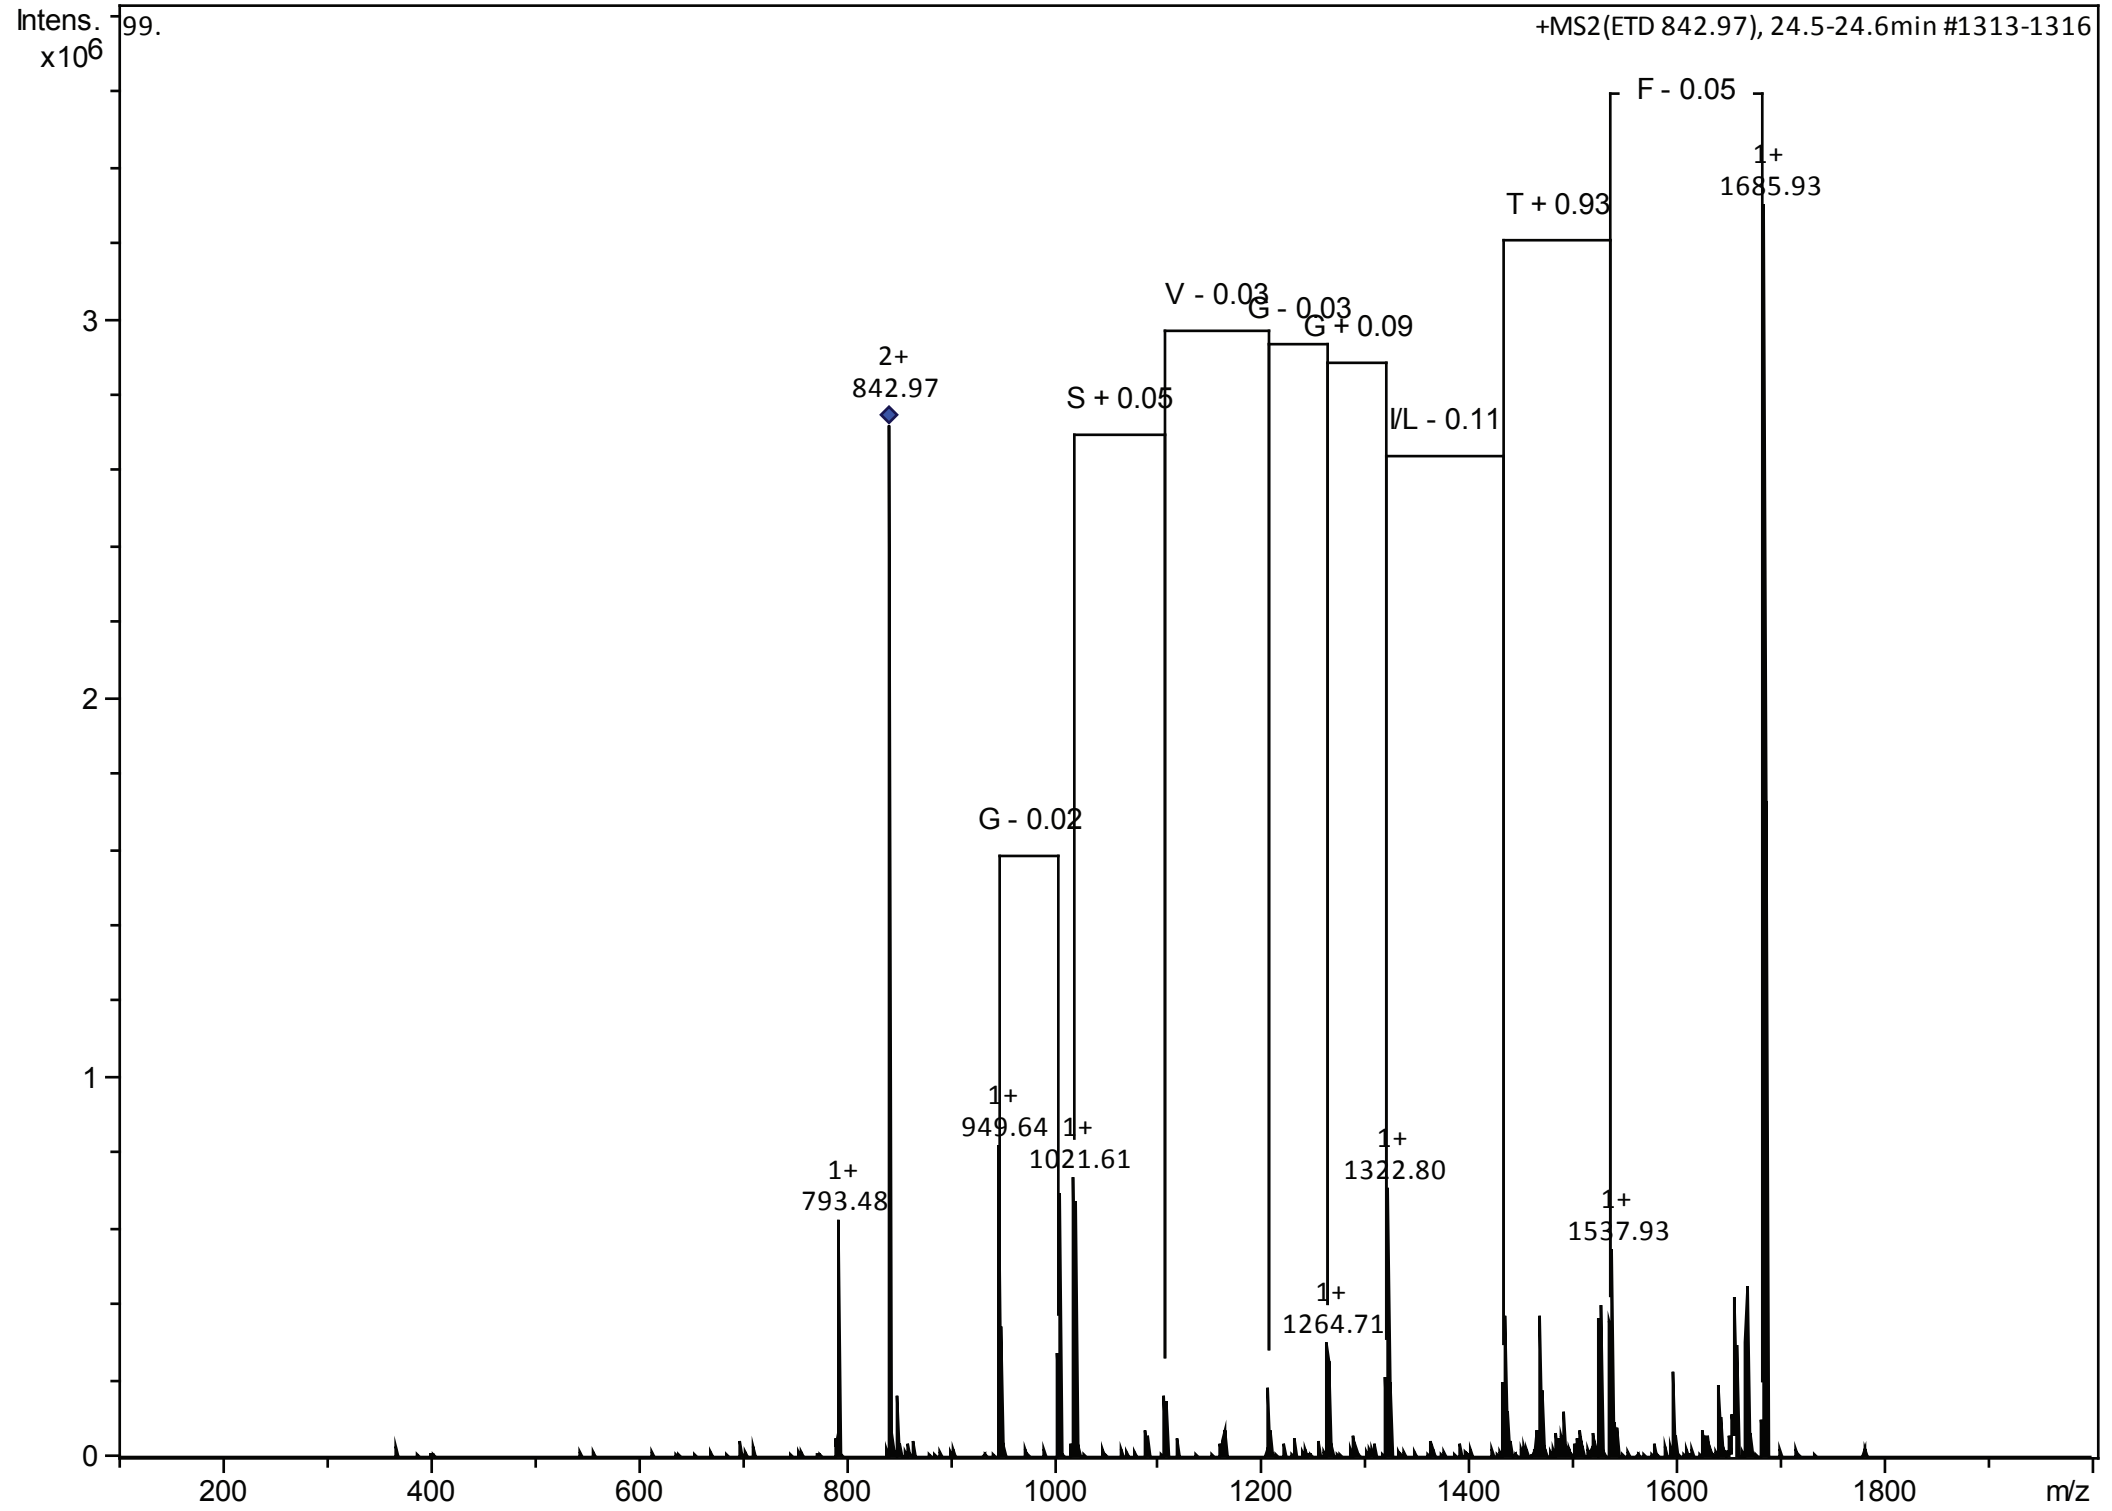

N  
ETD

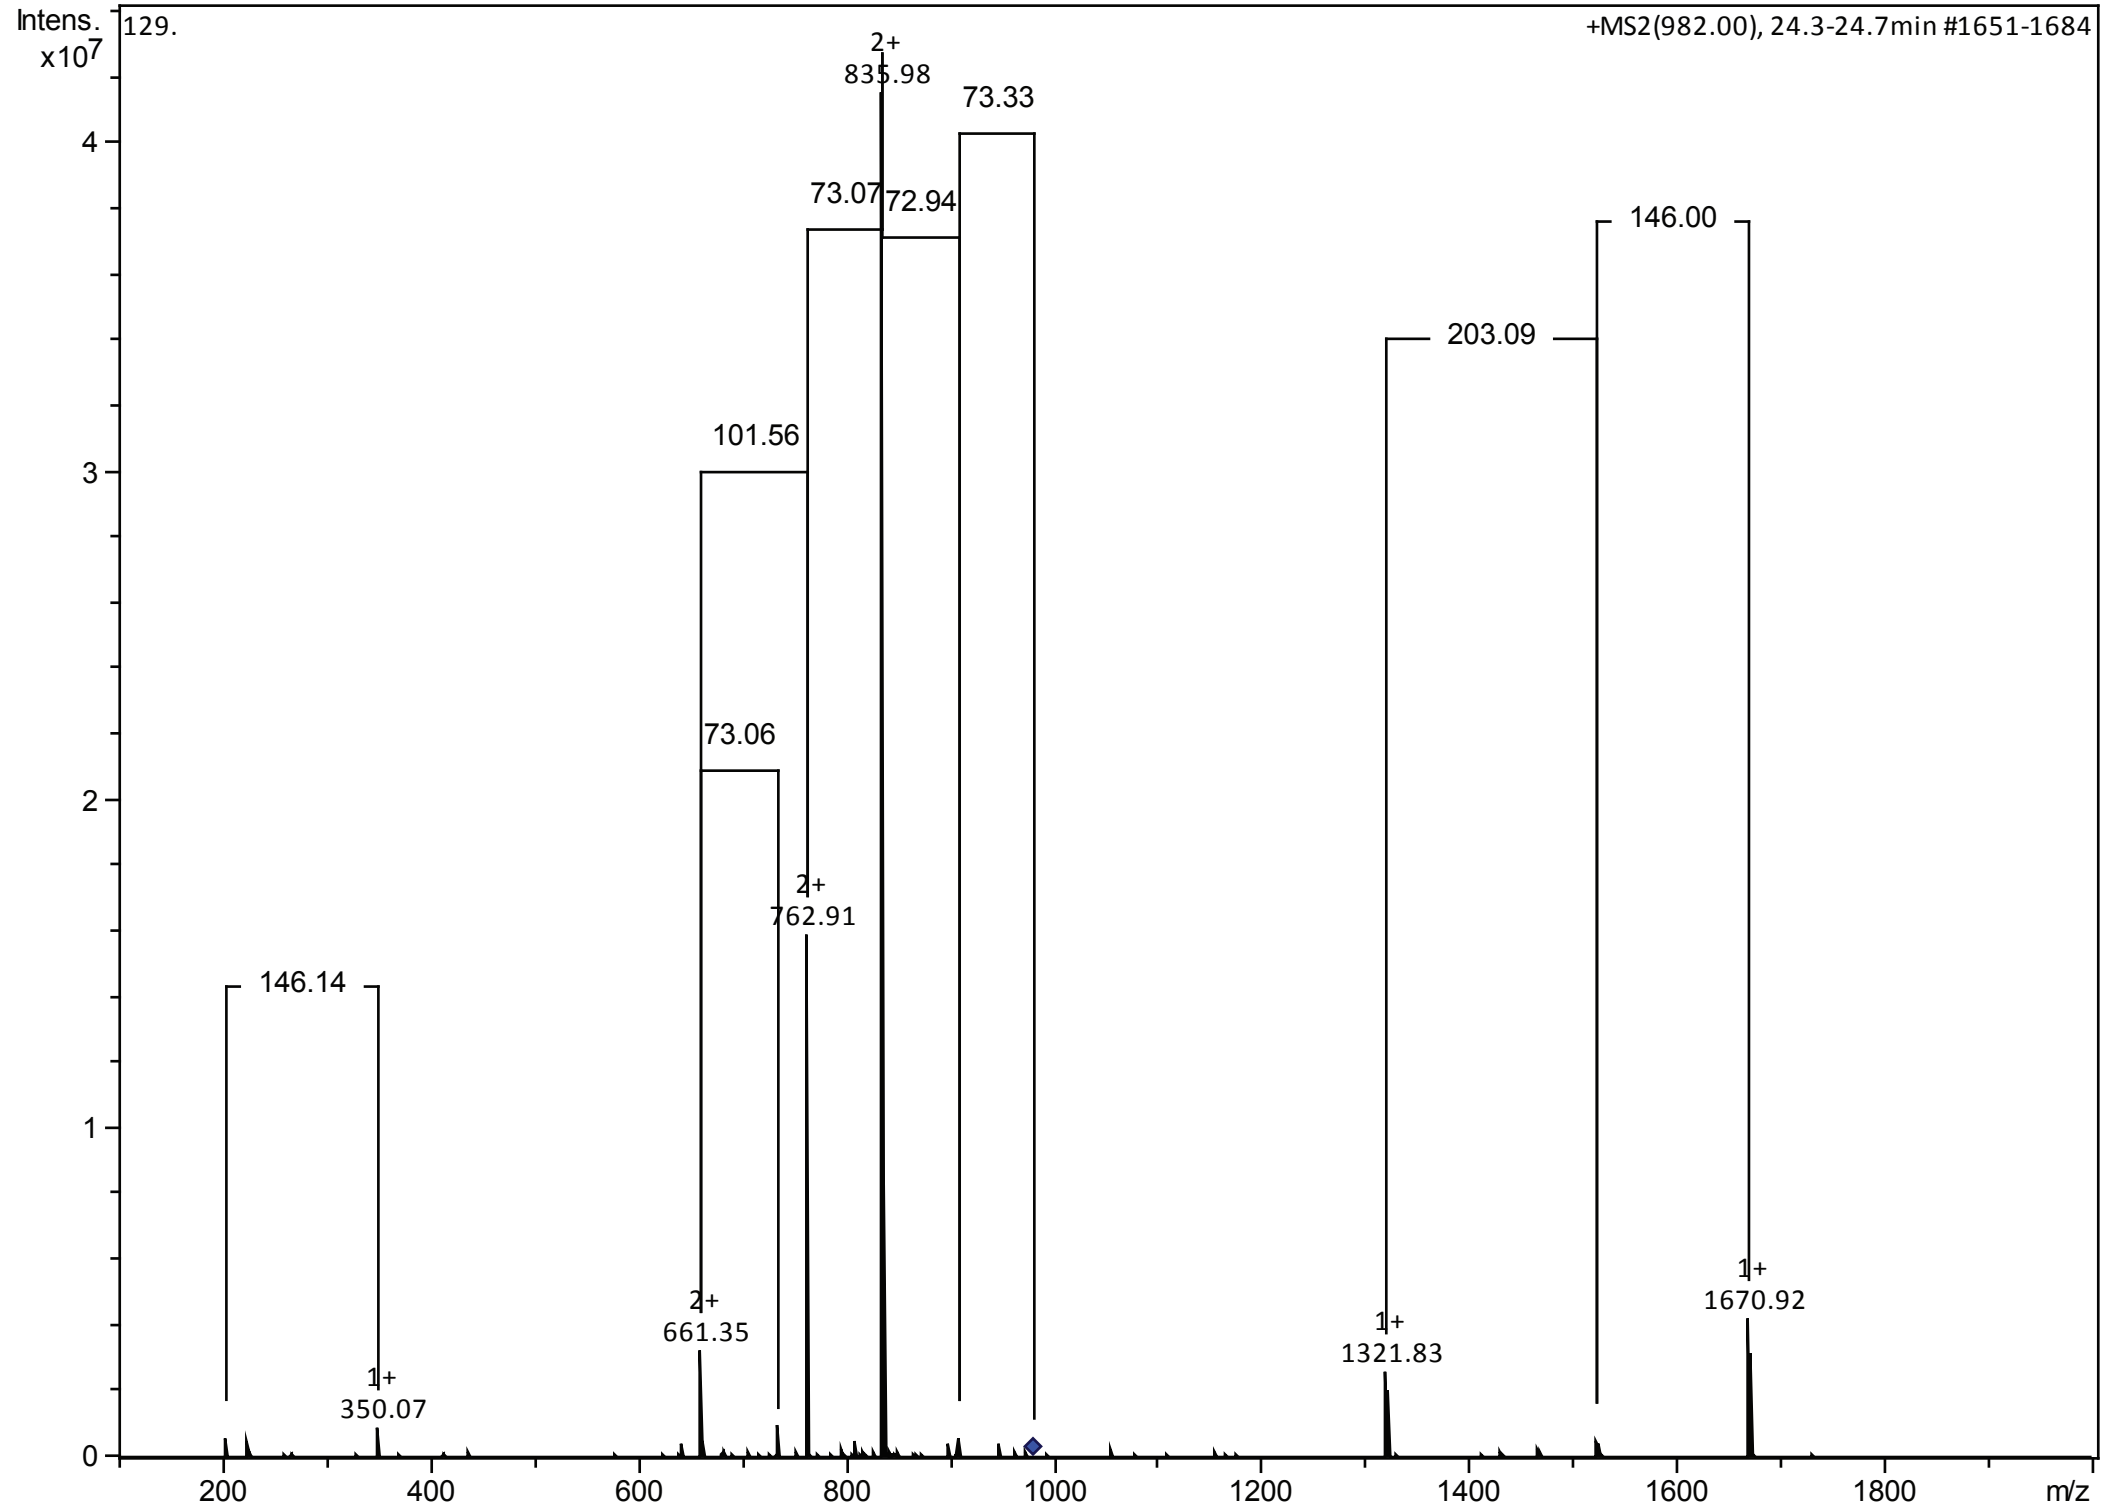

○  
CID

+MS2(982.00), 24.3-24.7min #1651-1684

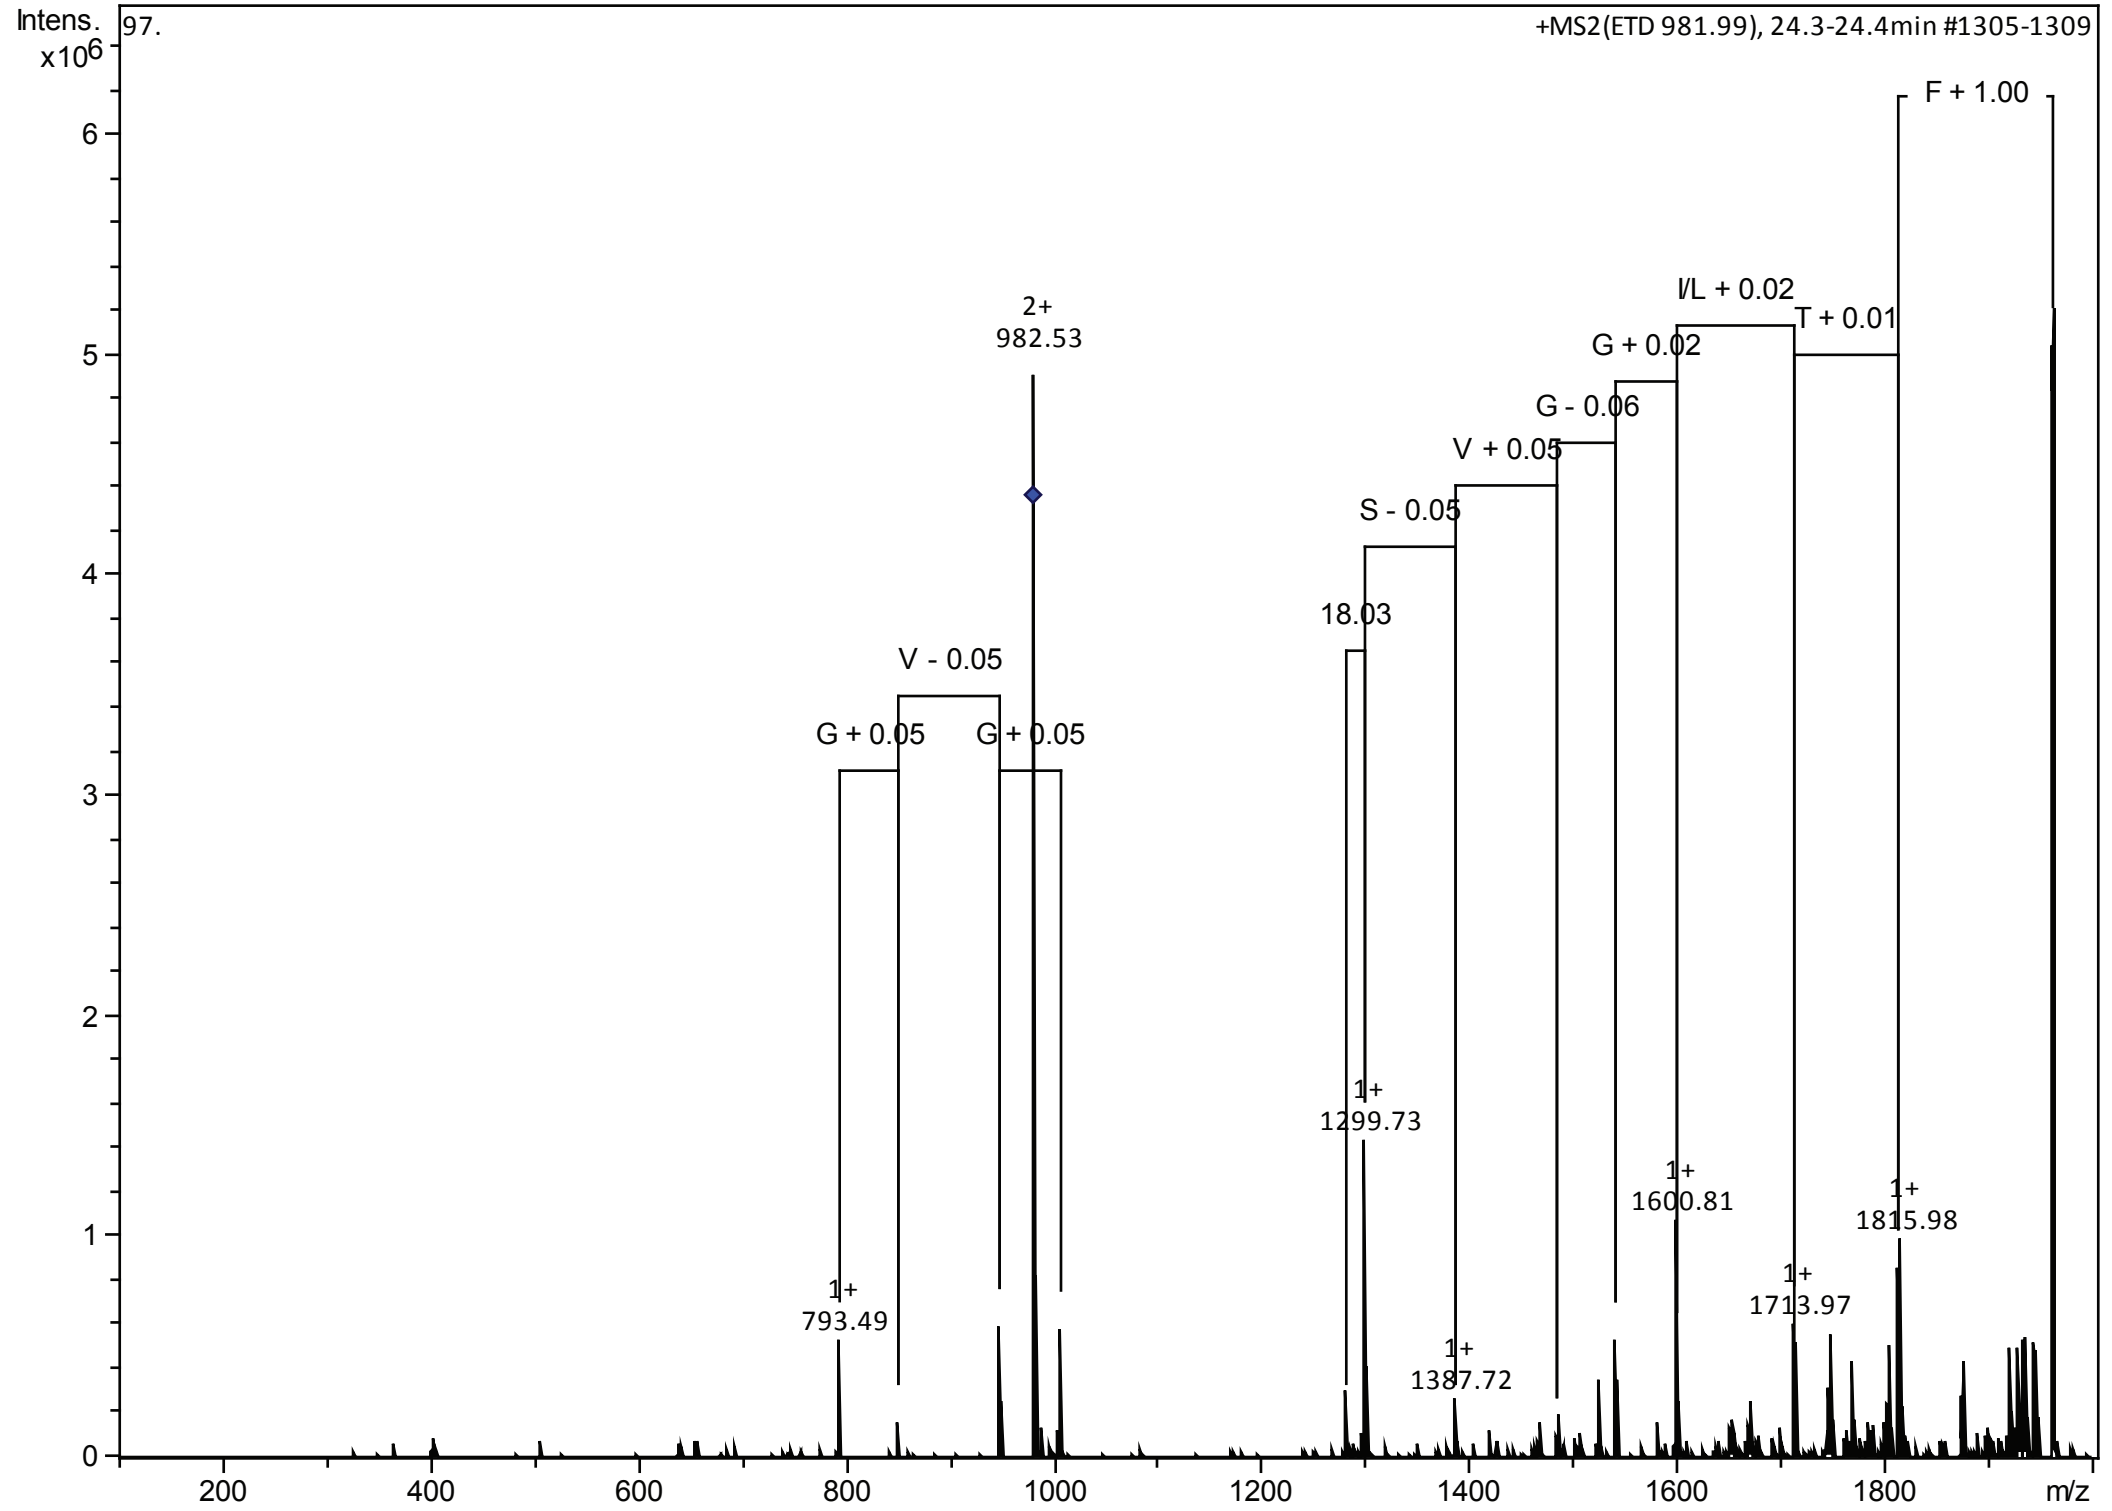

ETD

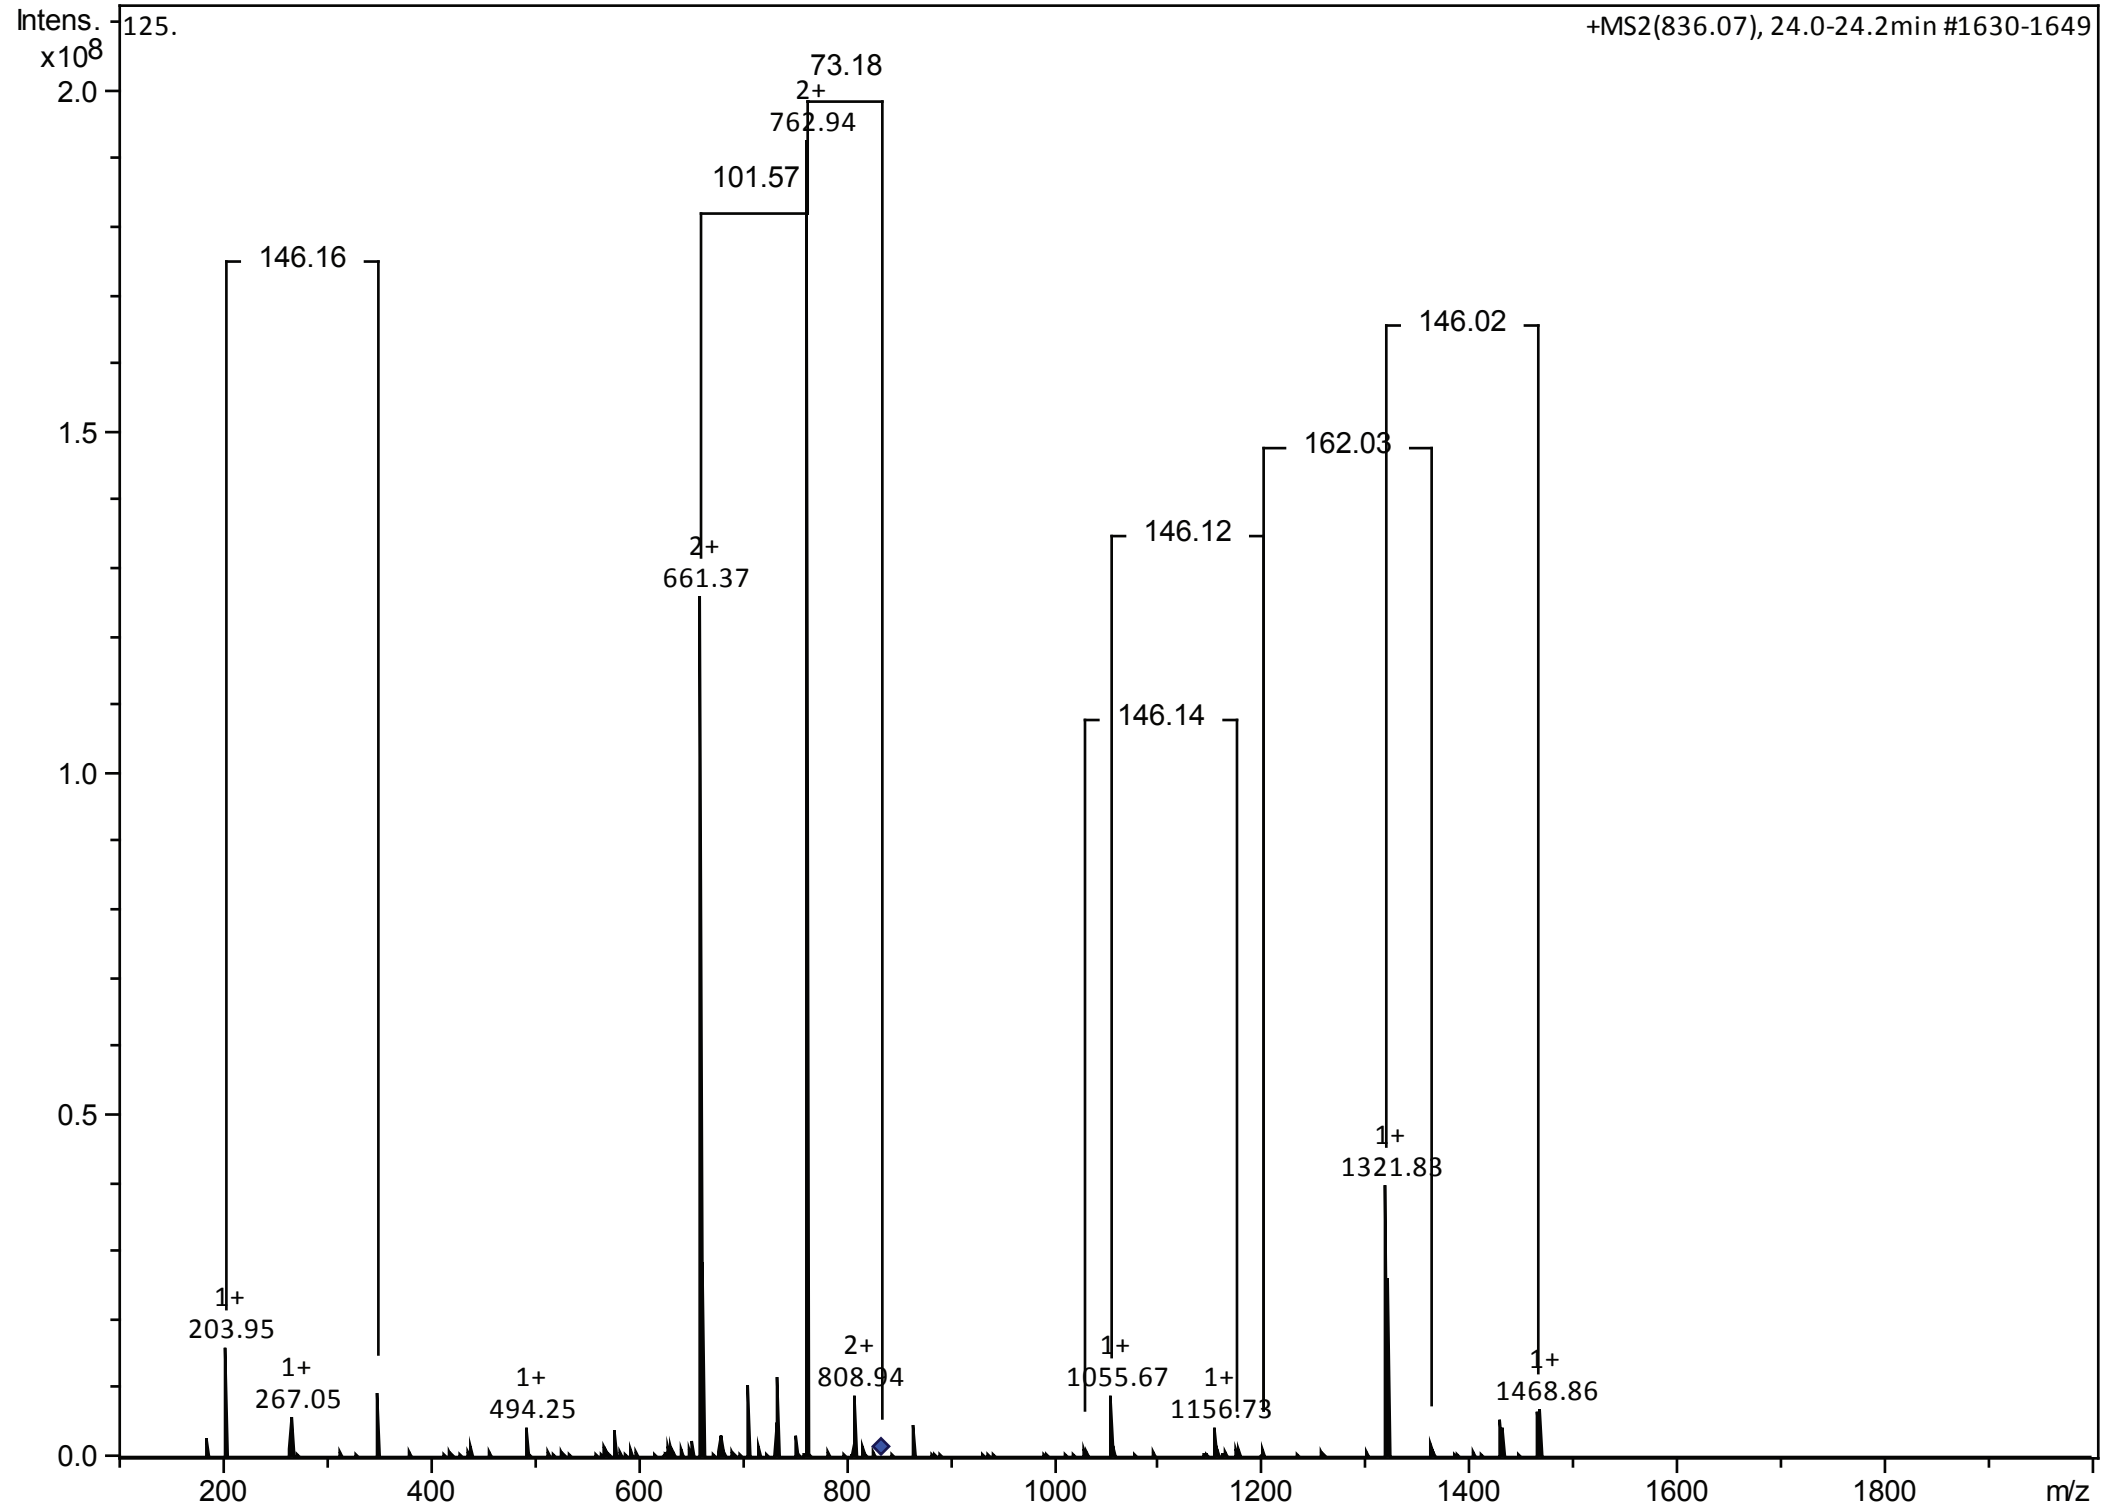

P  
CID

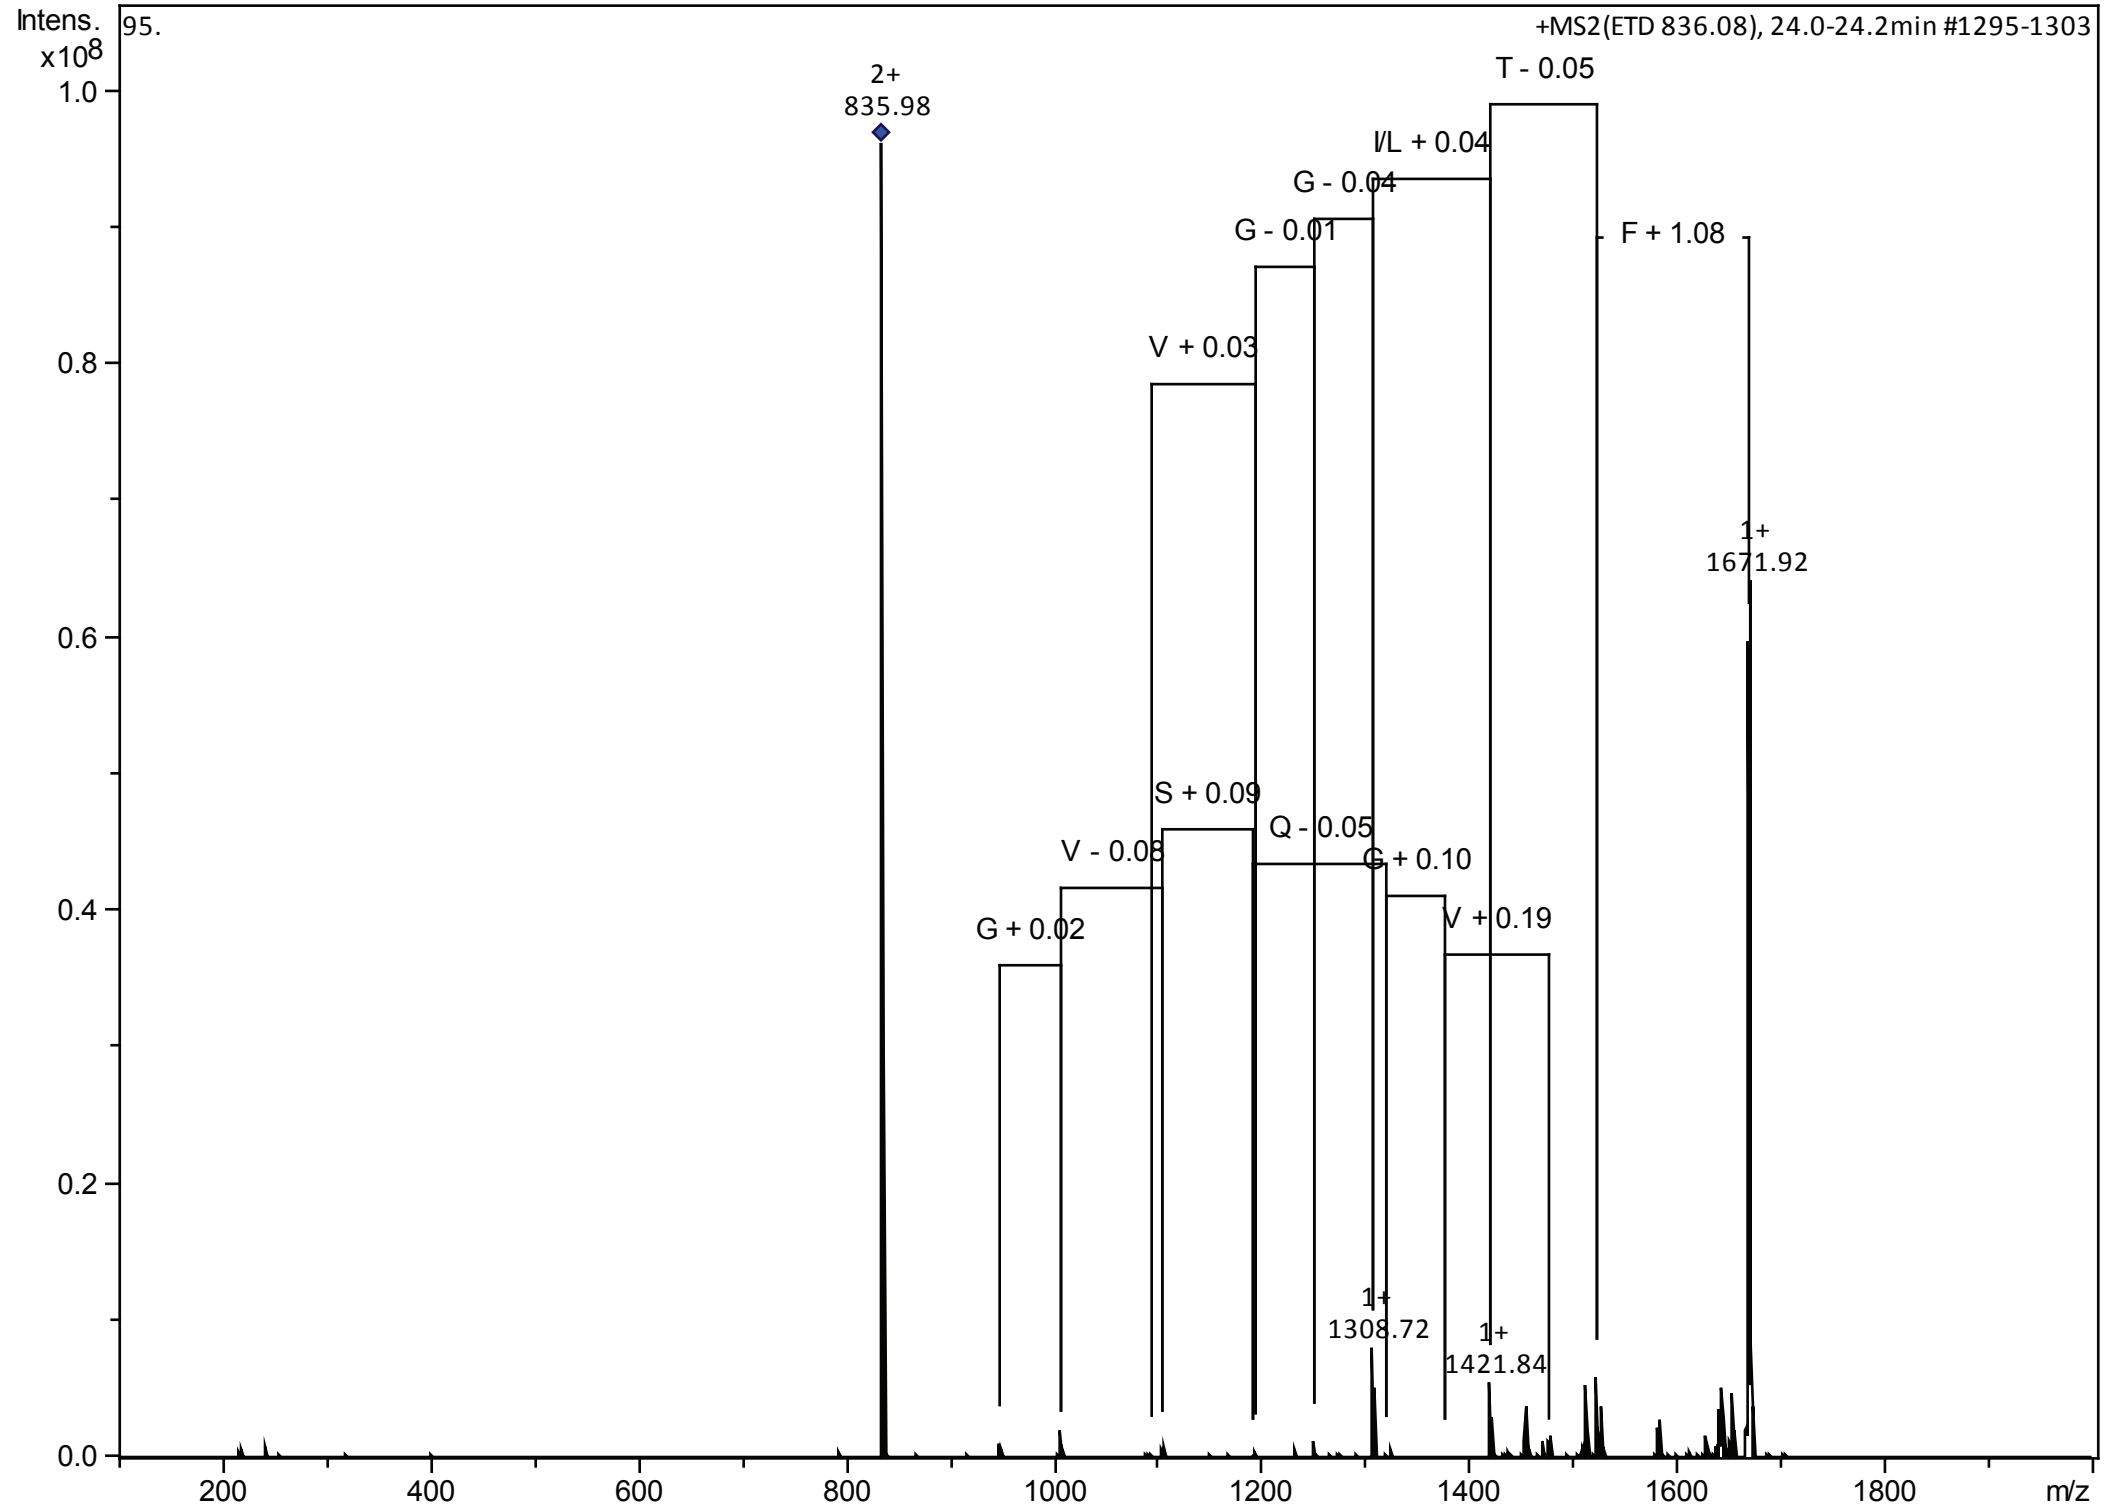

P  
ETD



Q  
CID

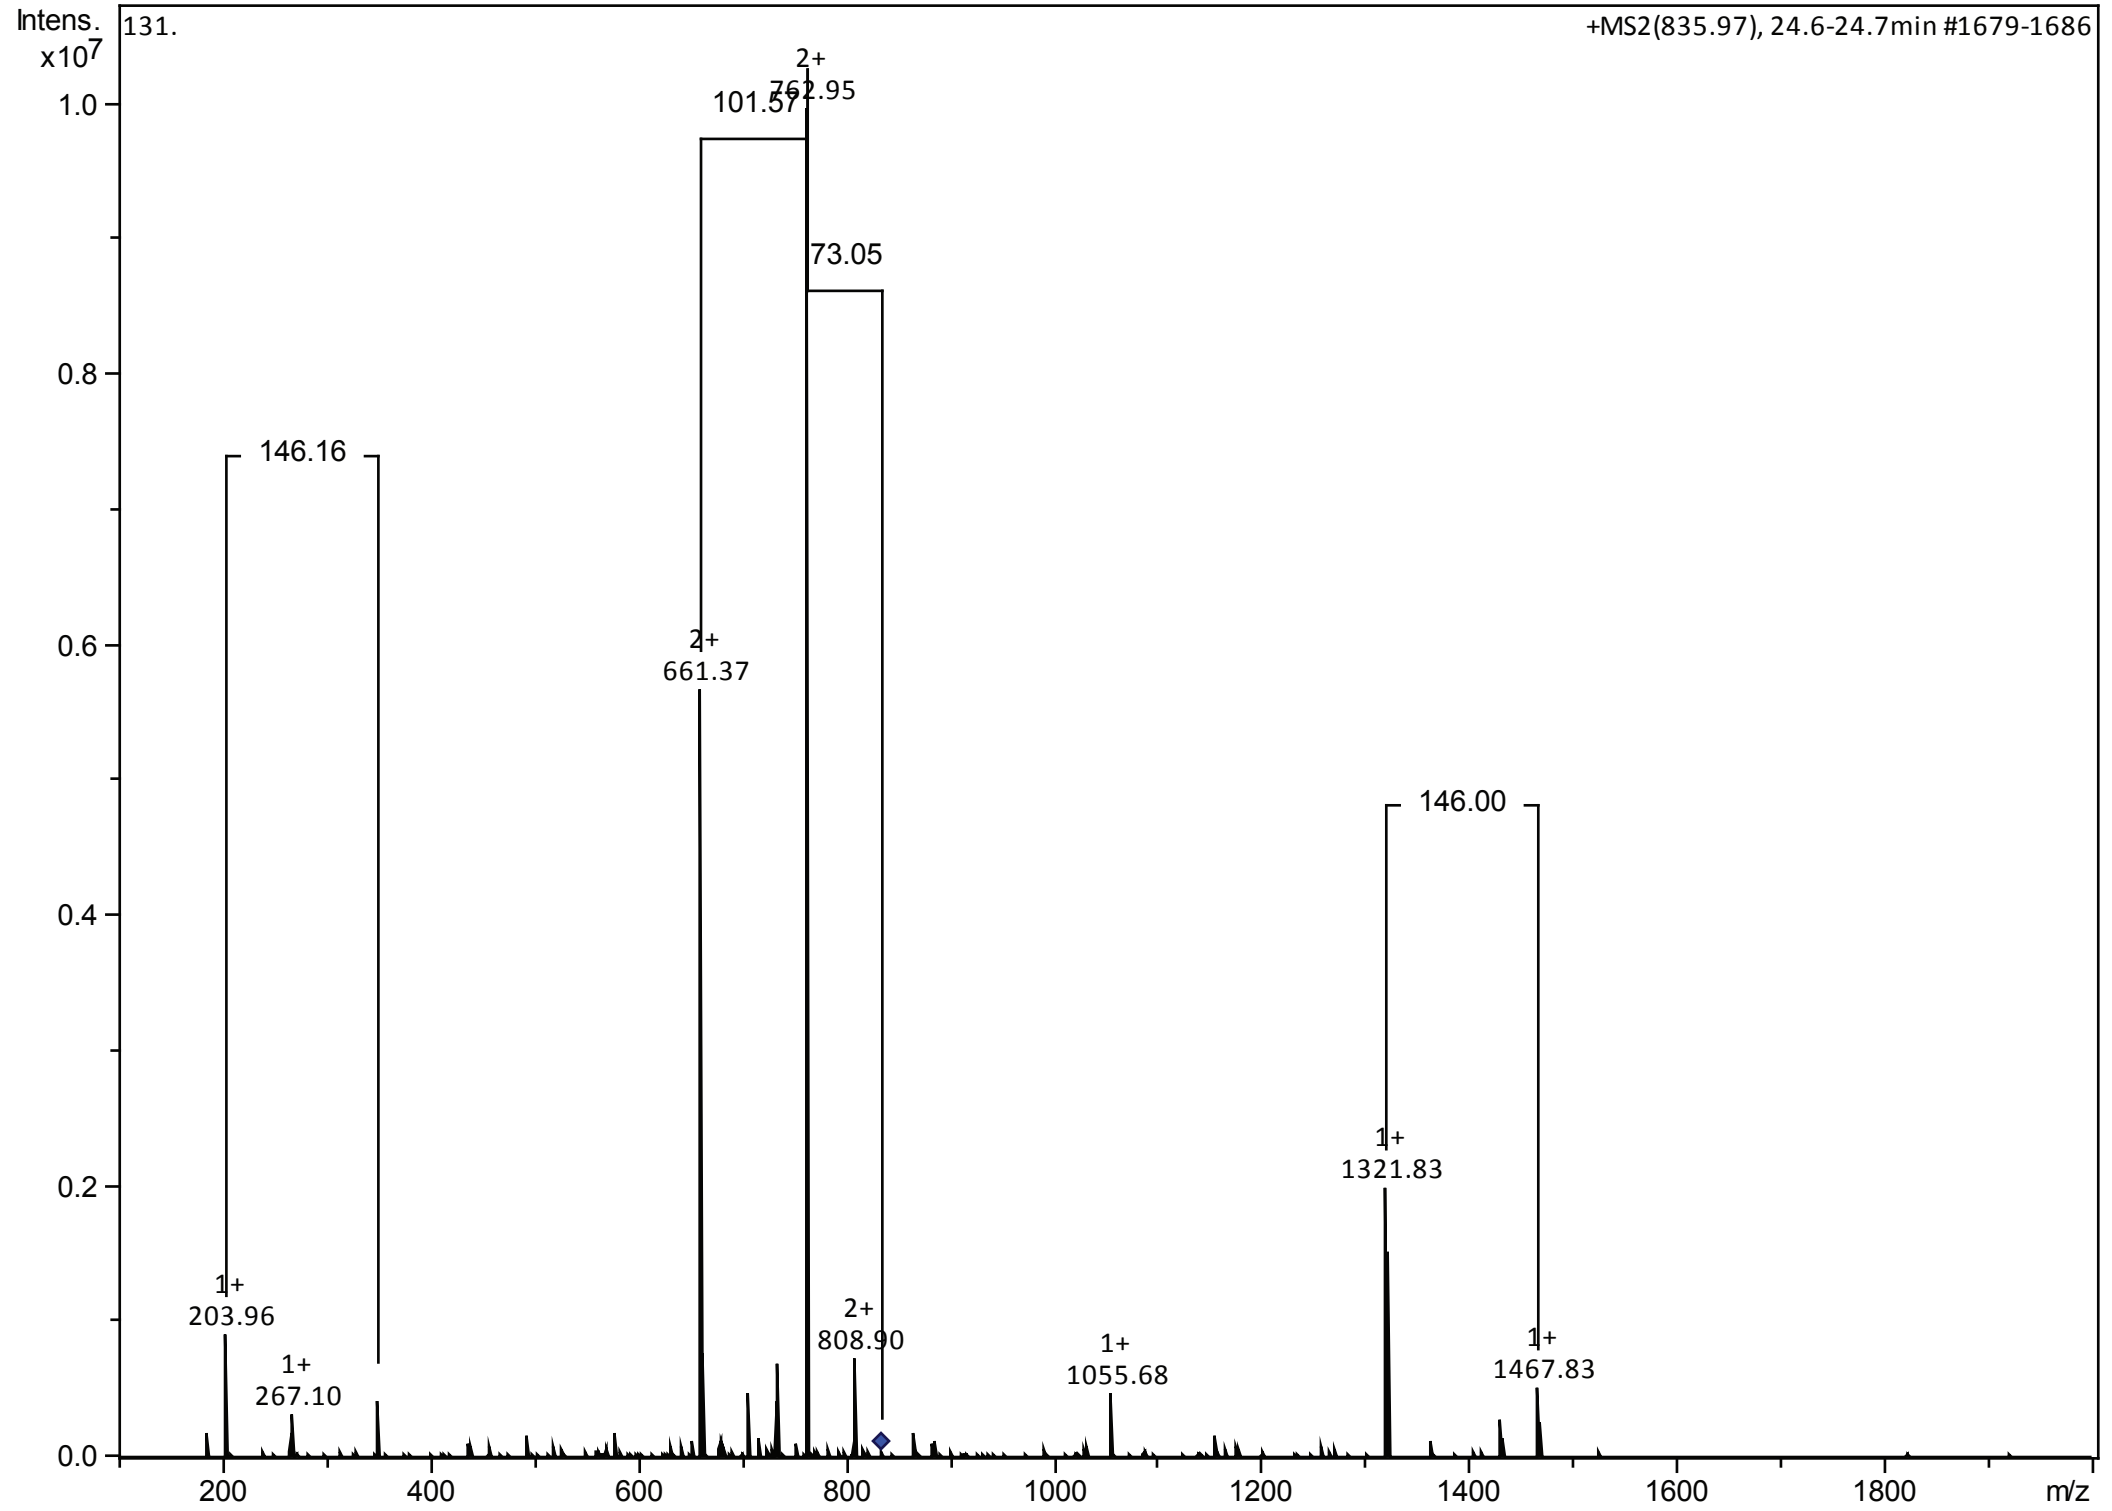

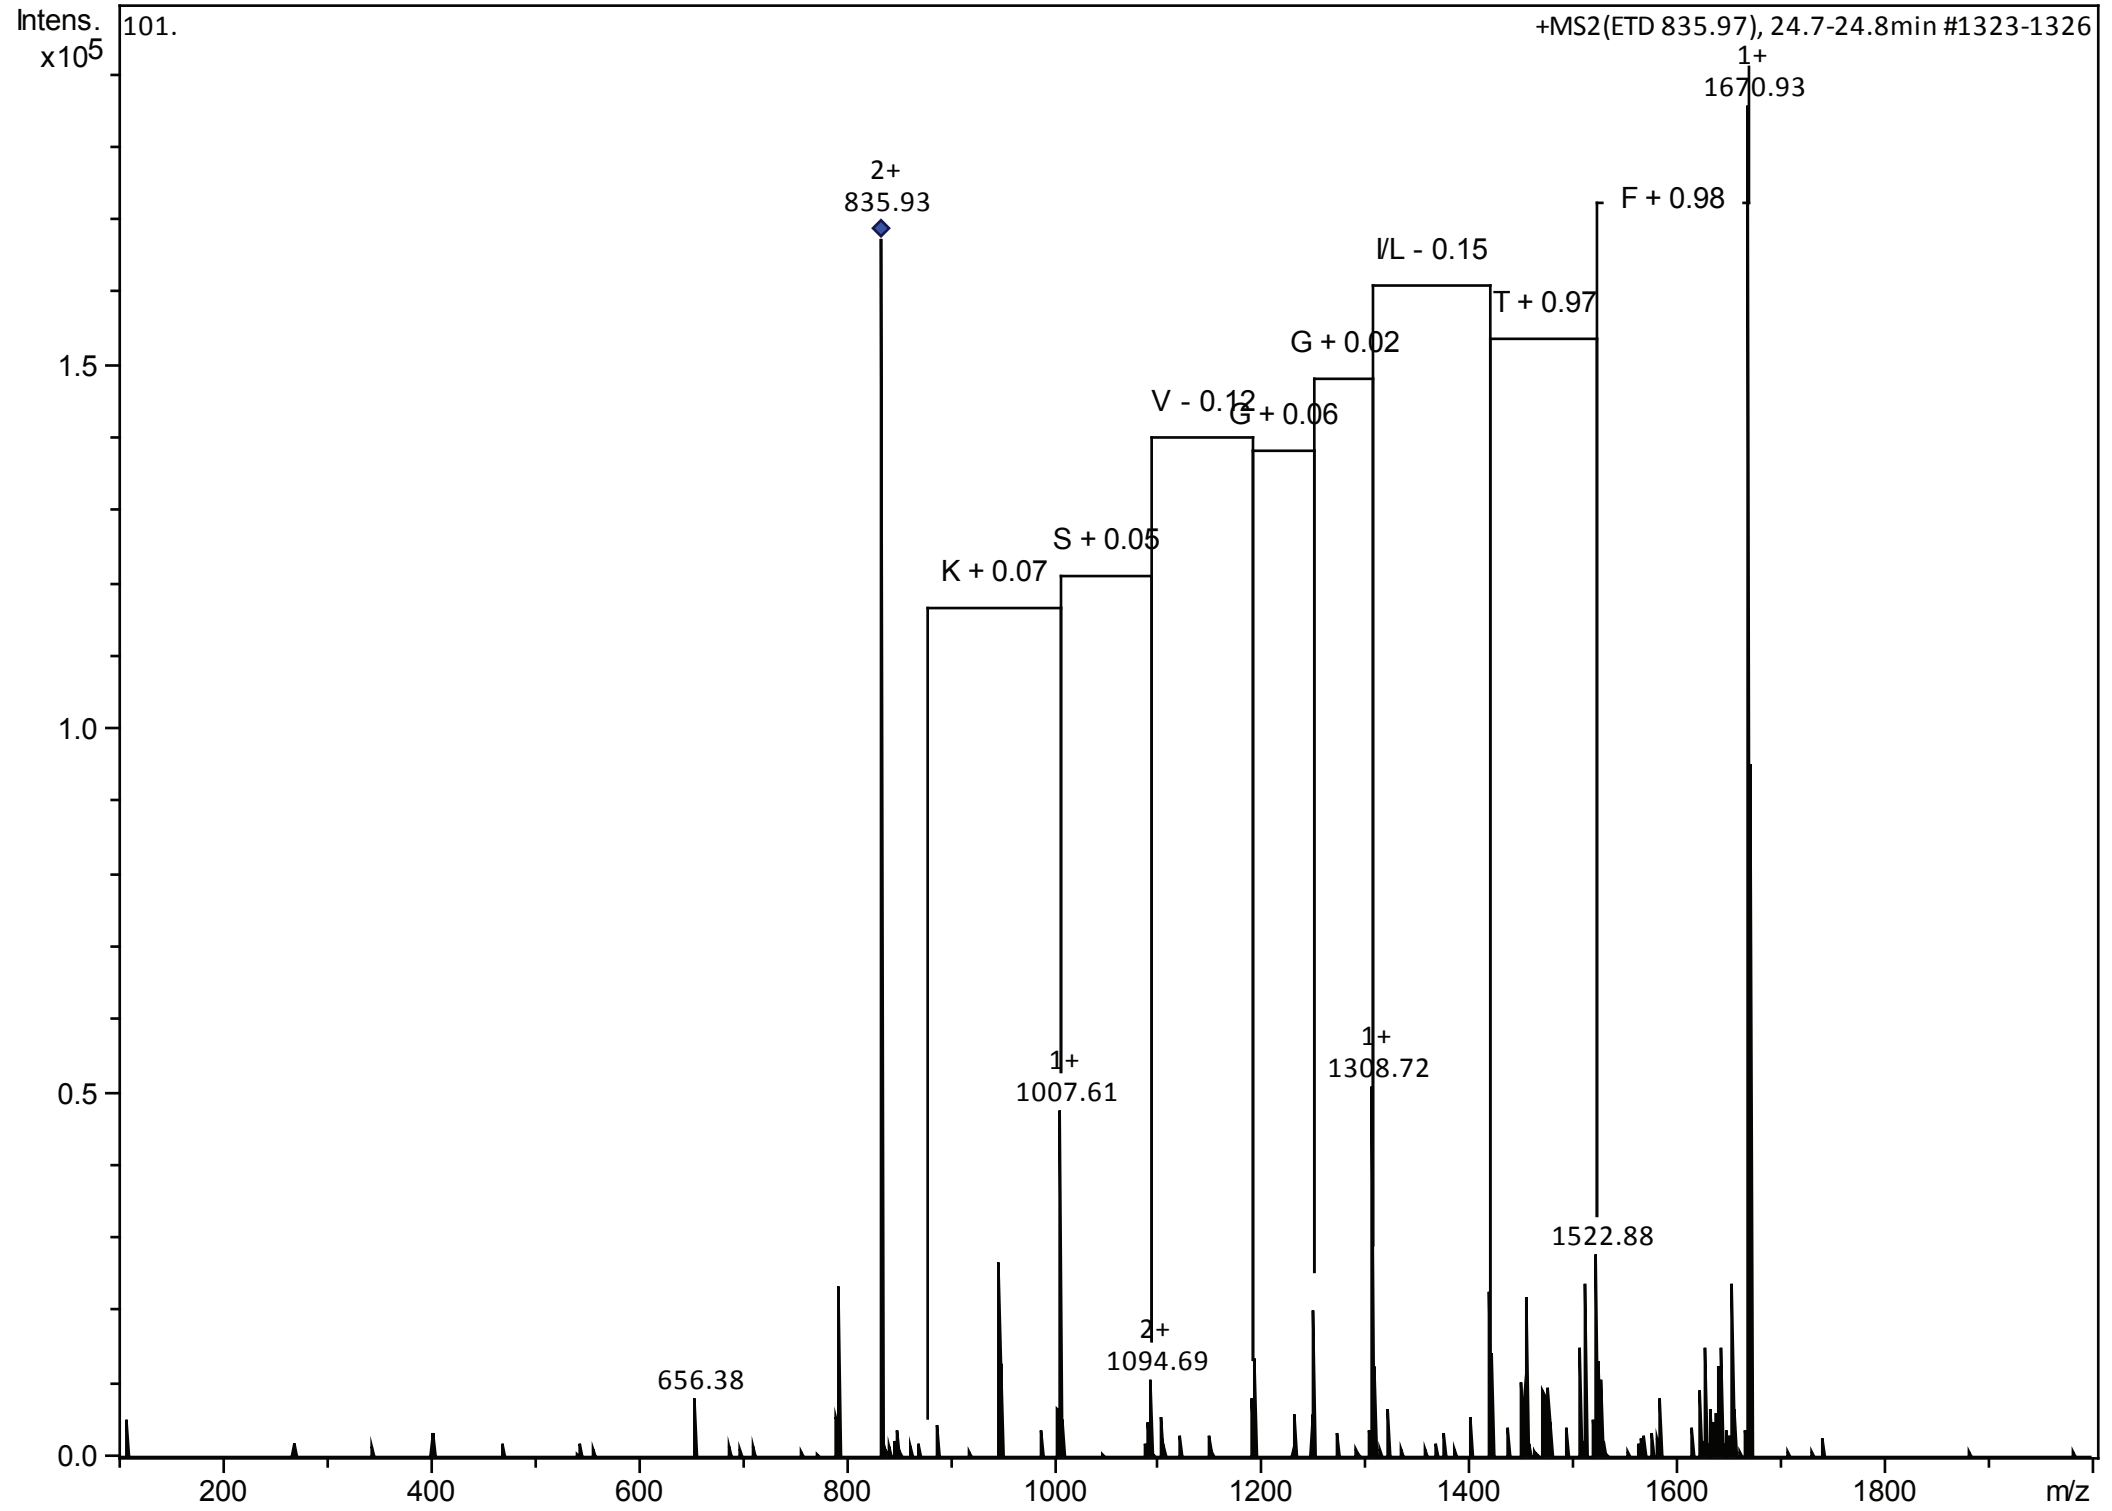

Q  
ETD

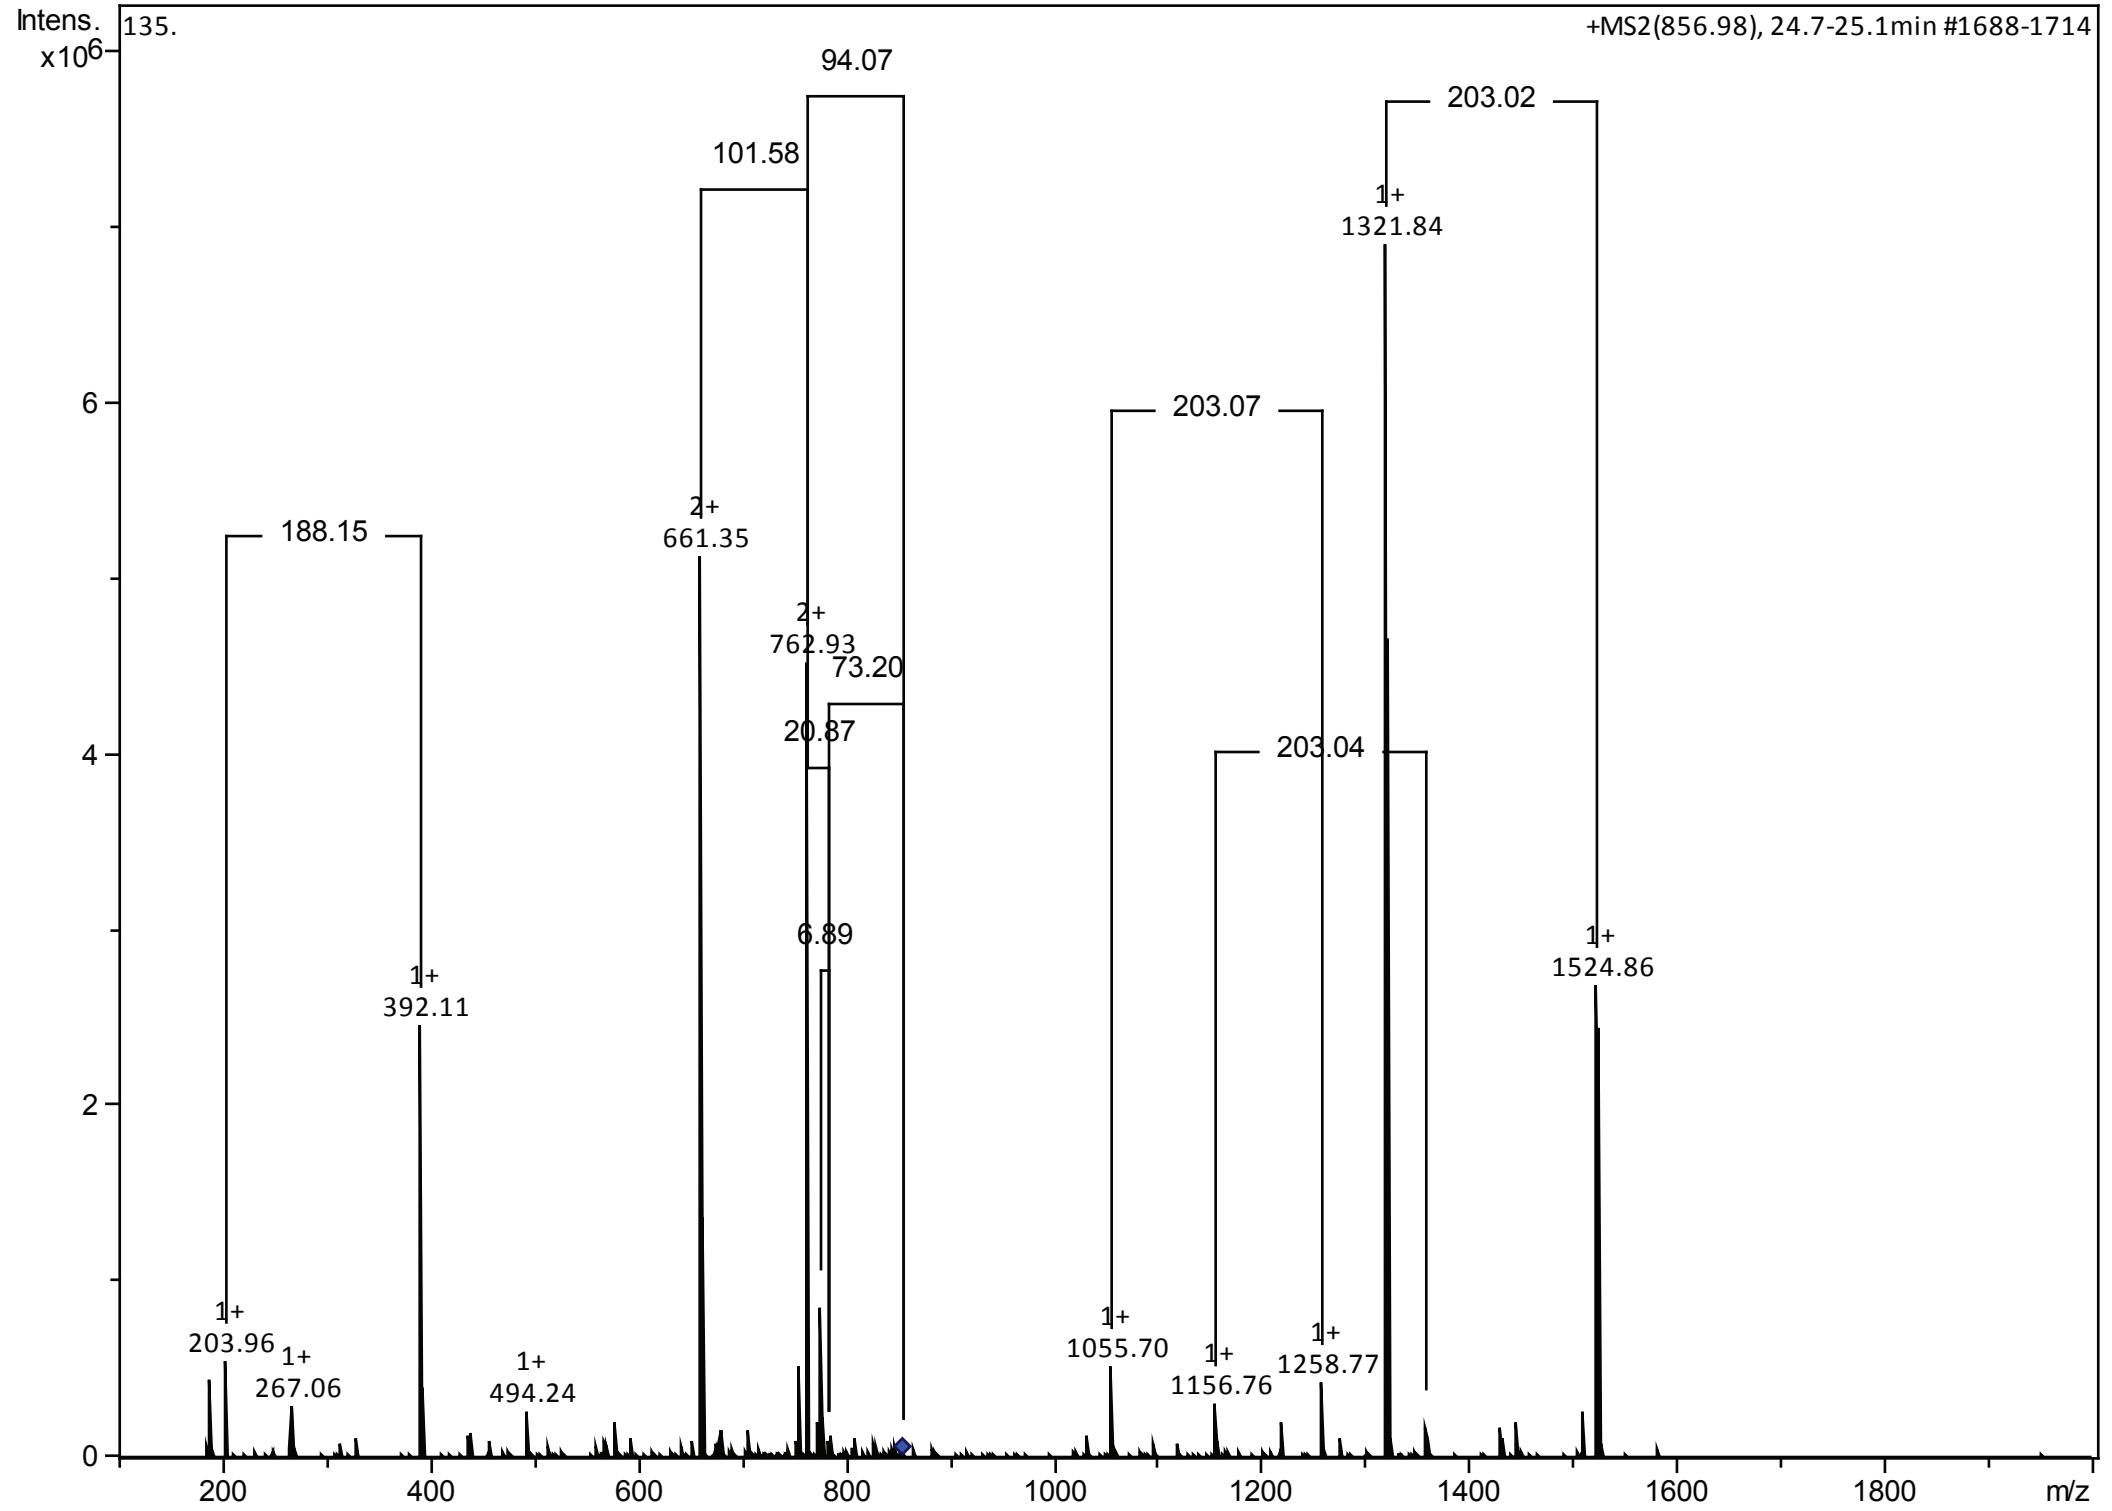

R  
CID

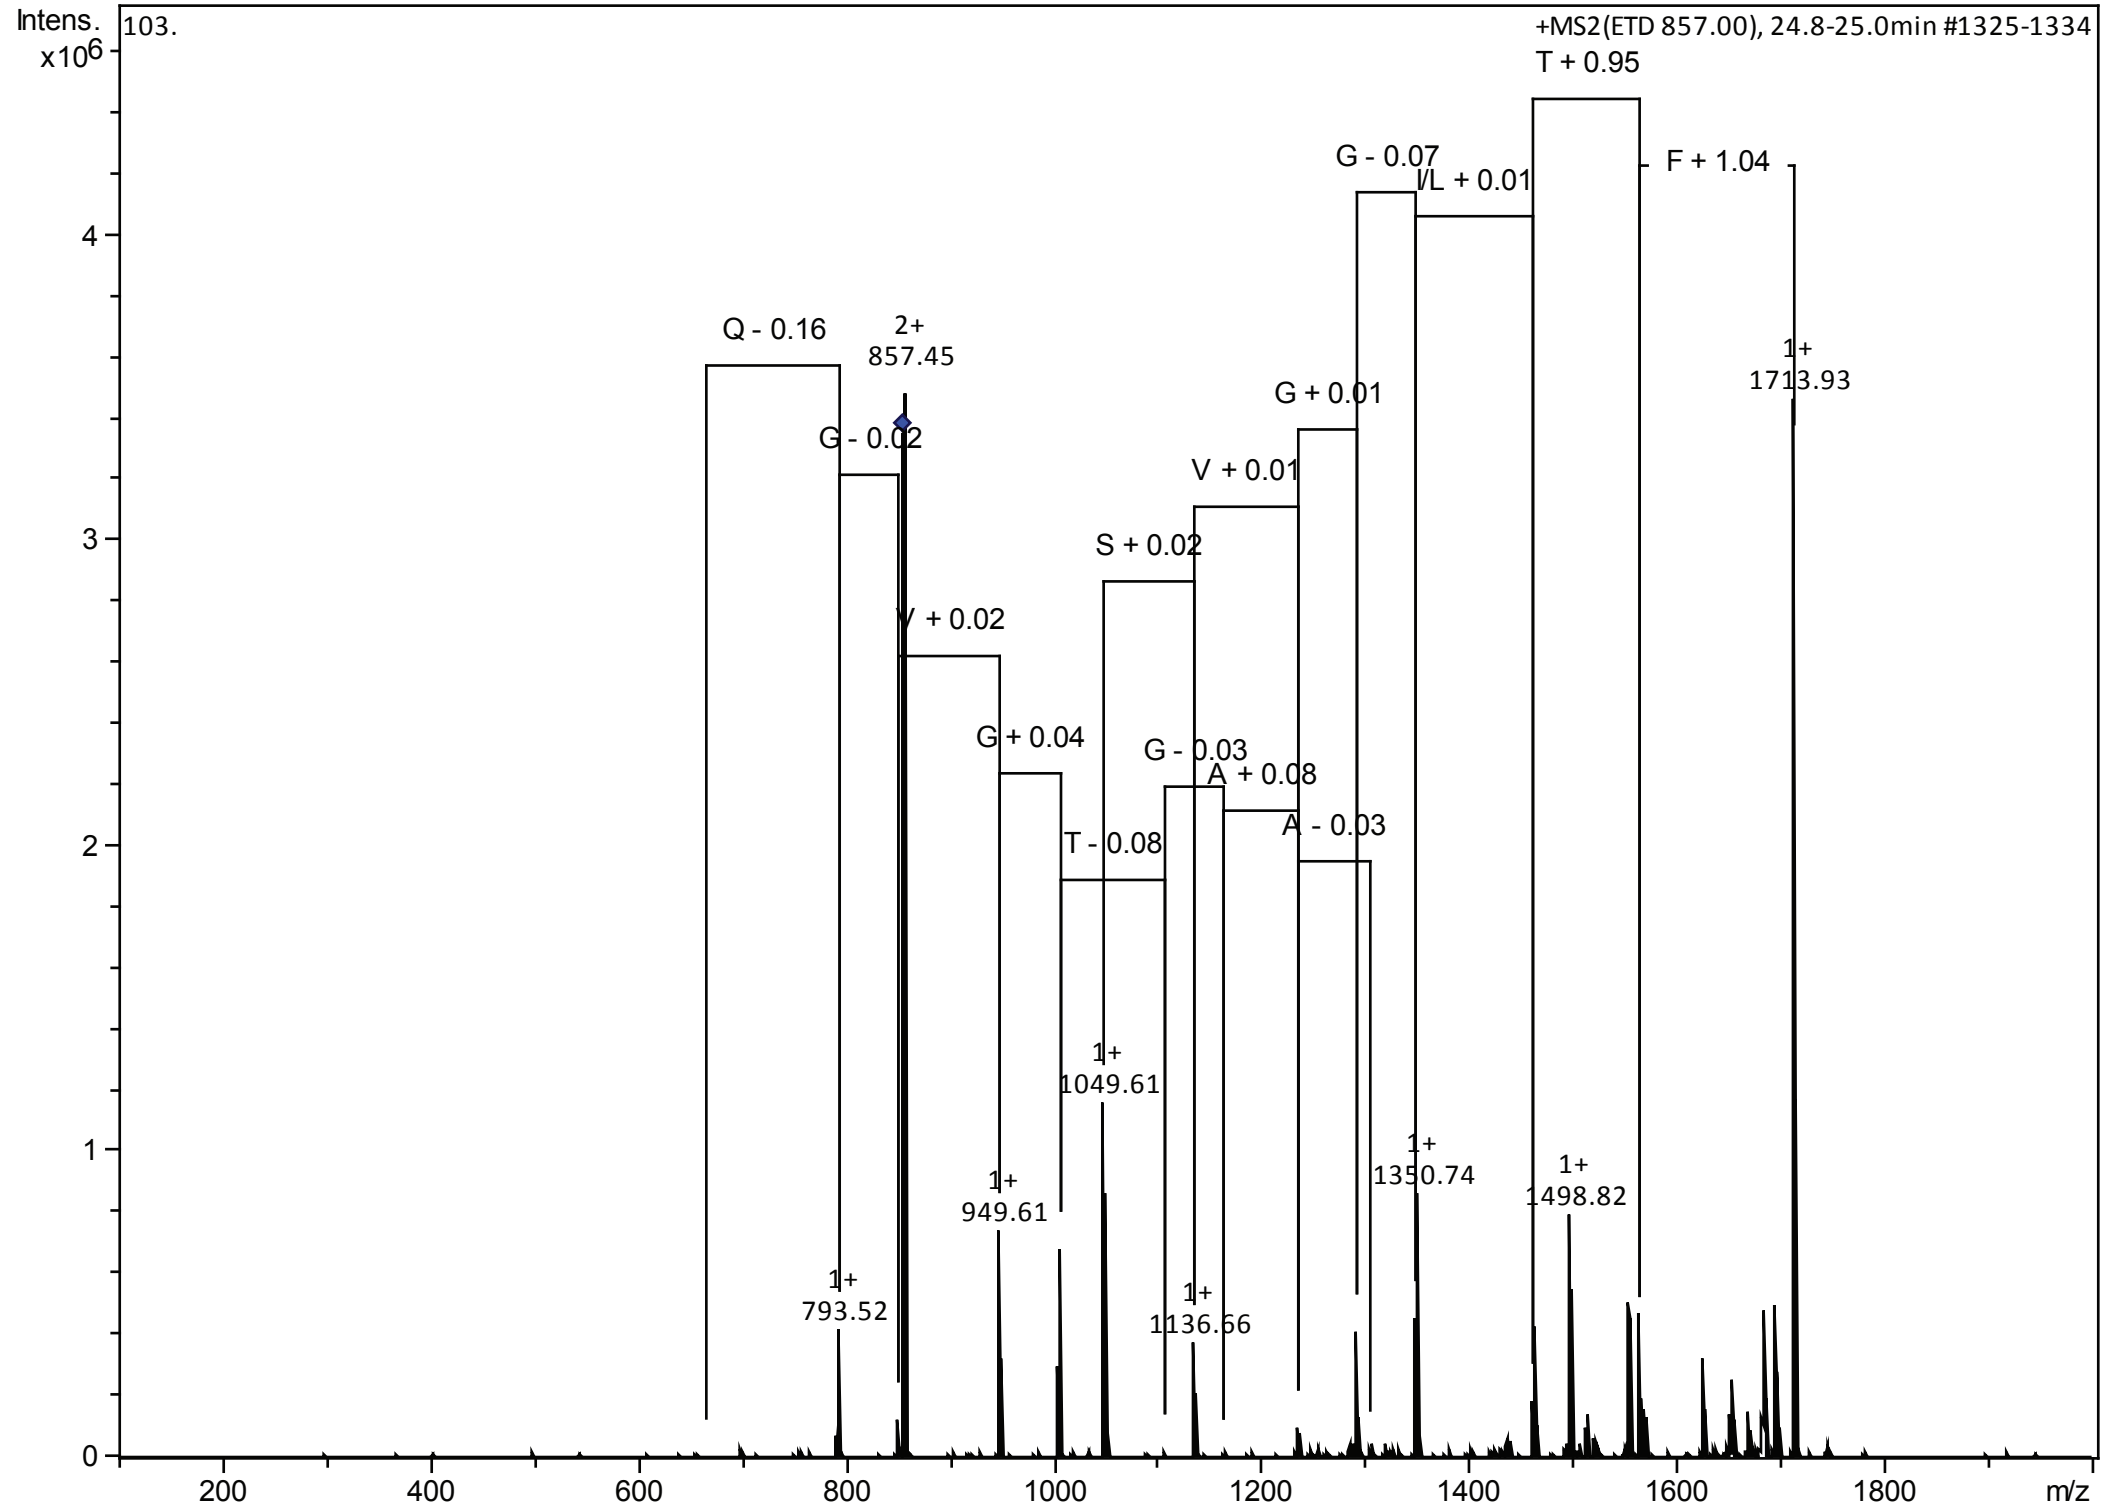

R  
ETD

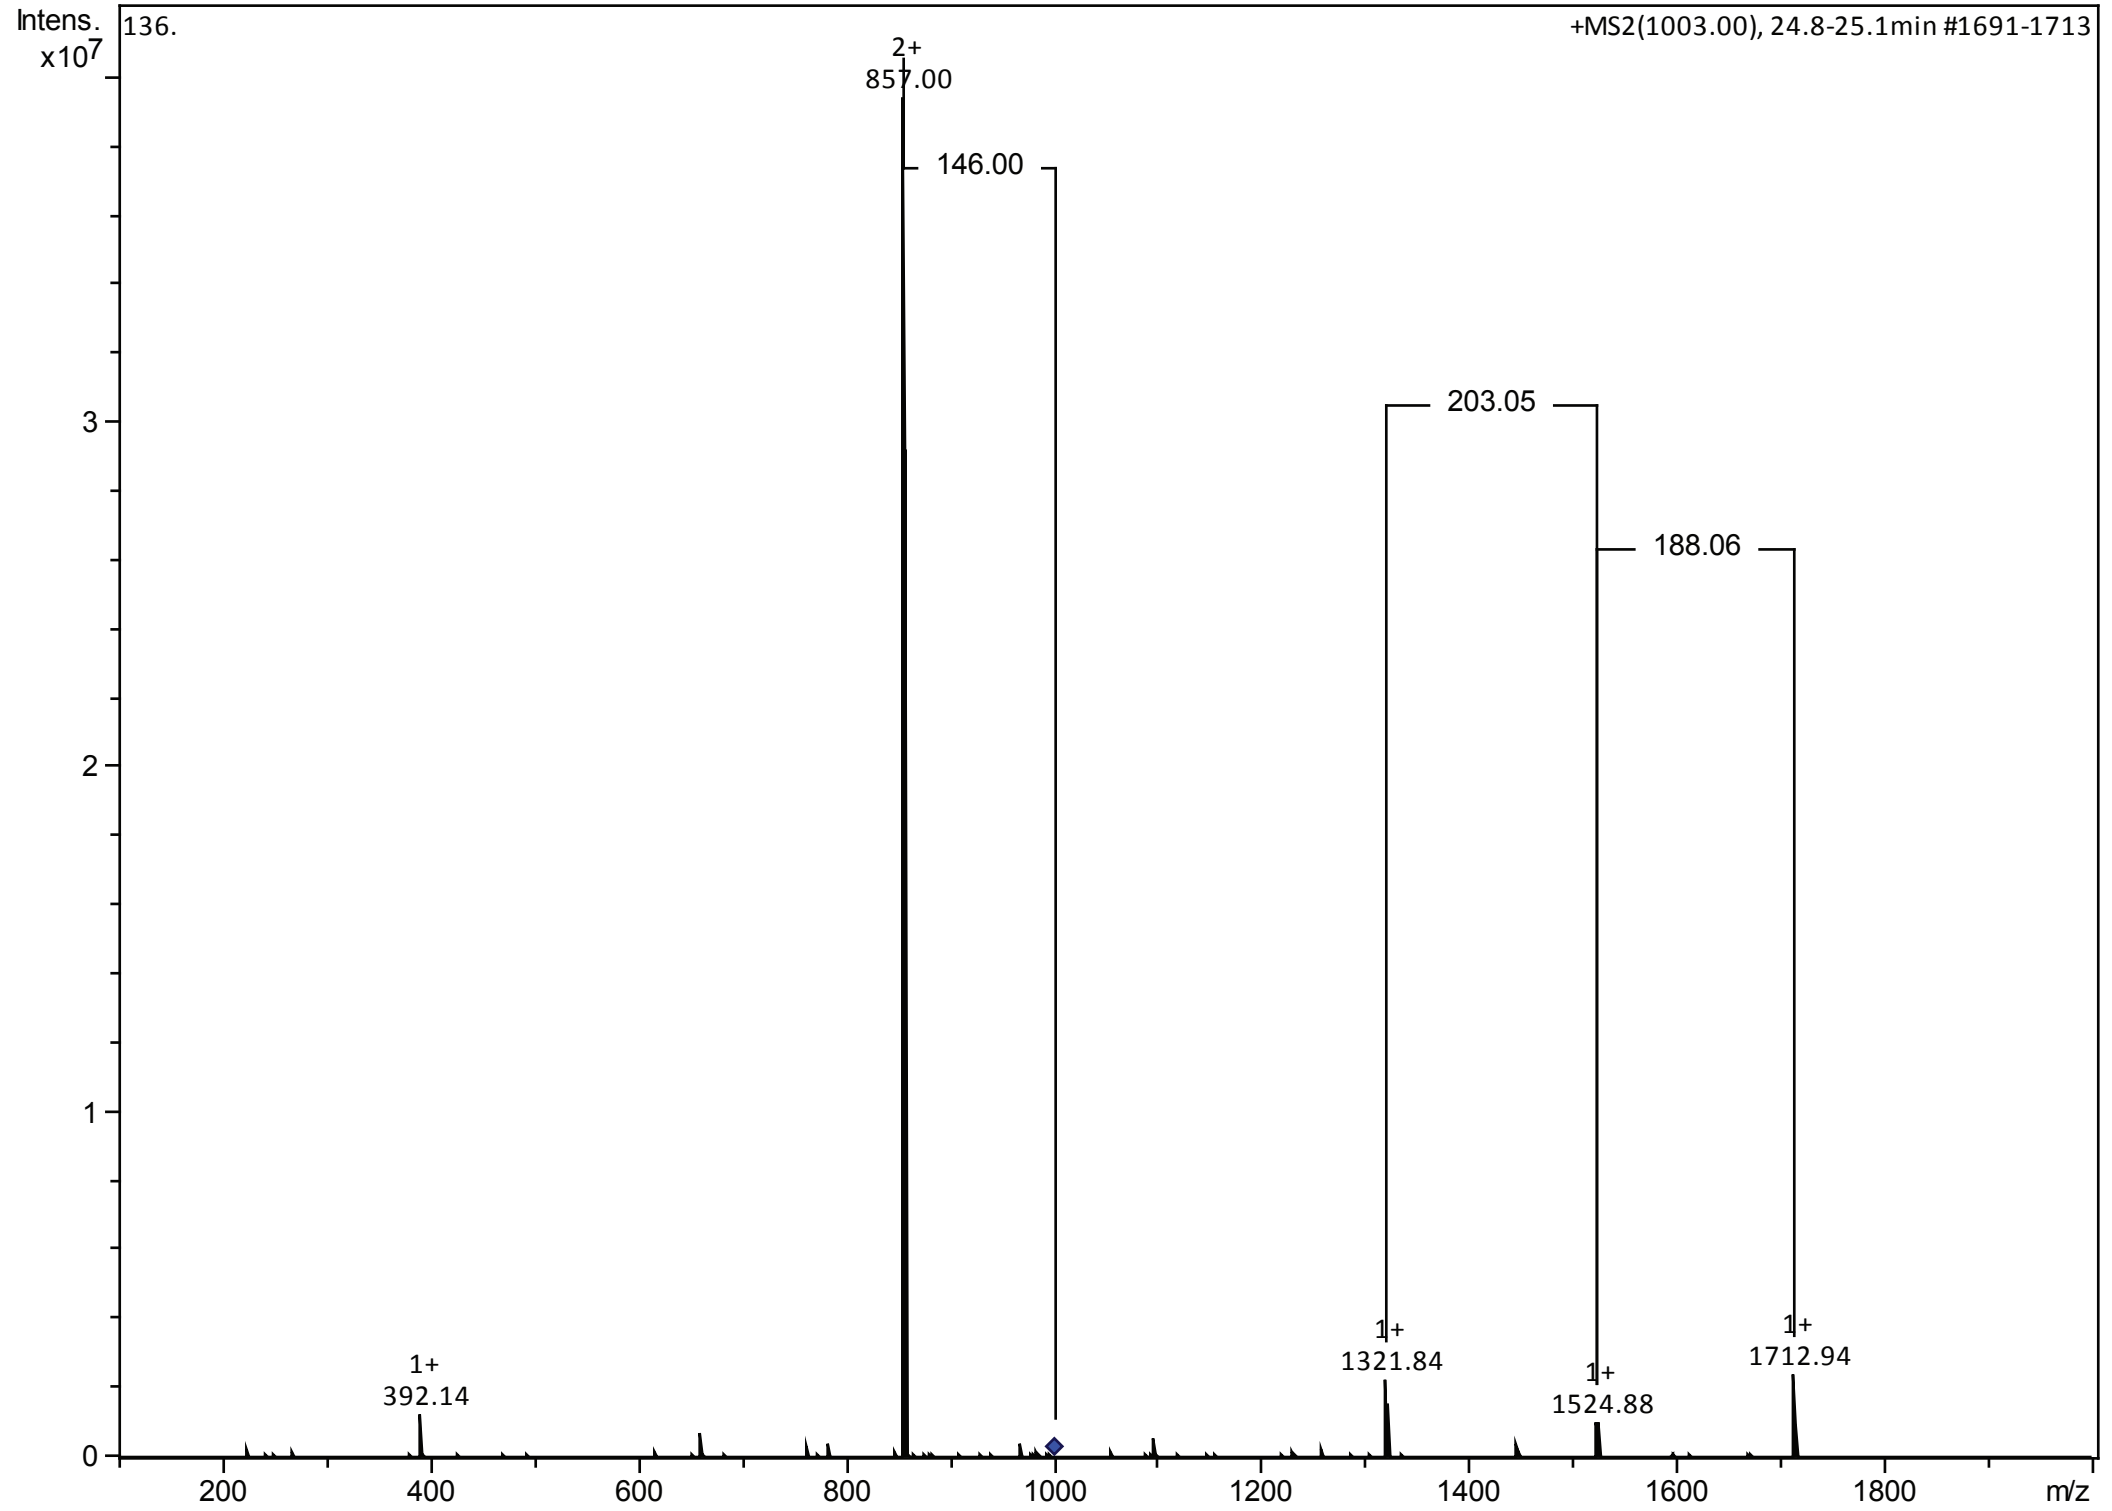

S  
CID

S  
ETD

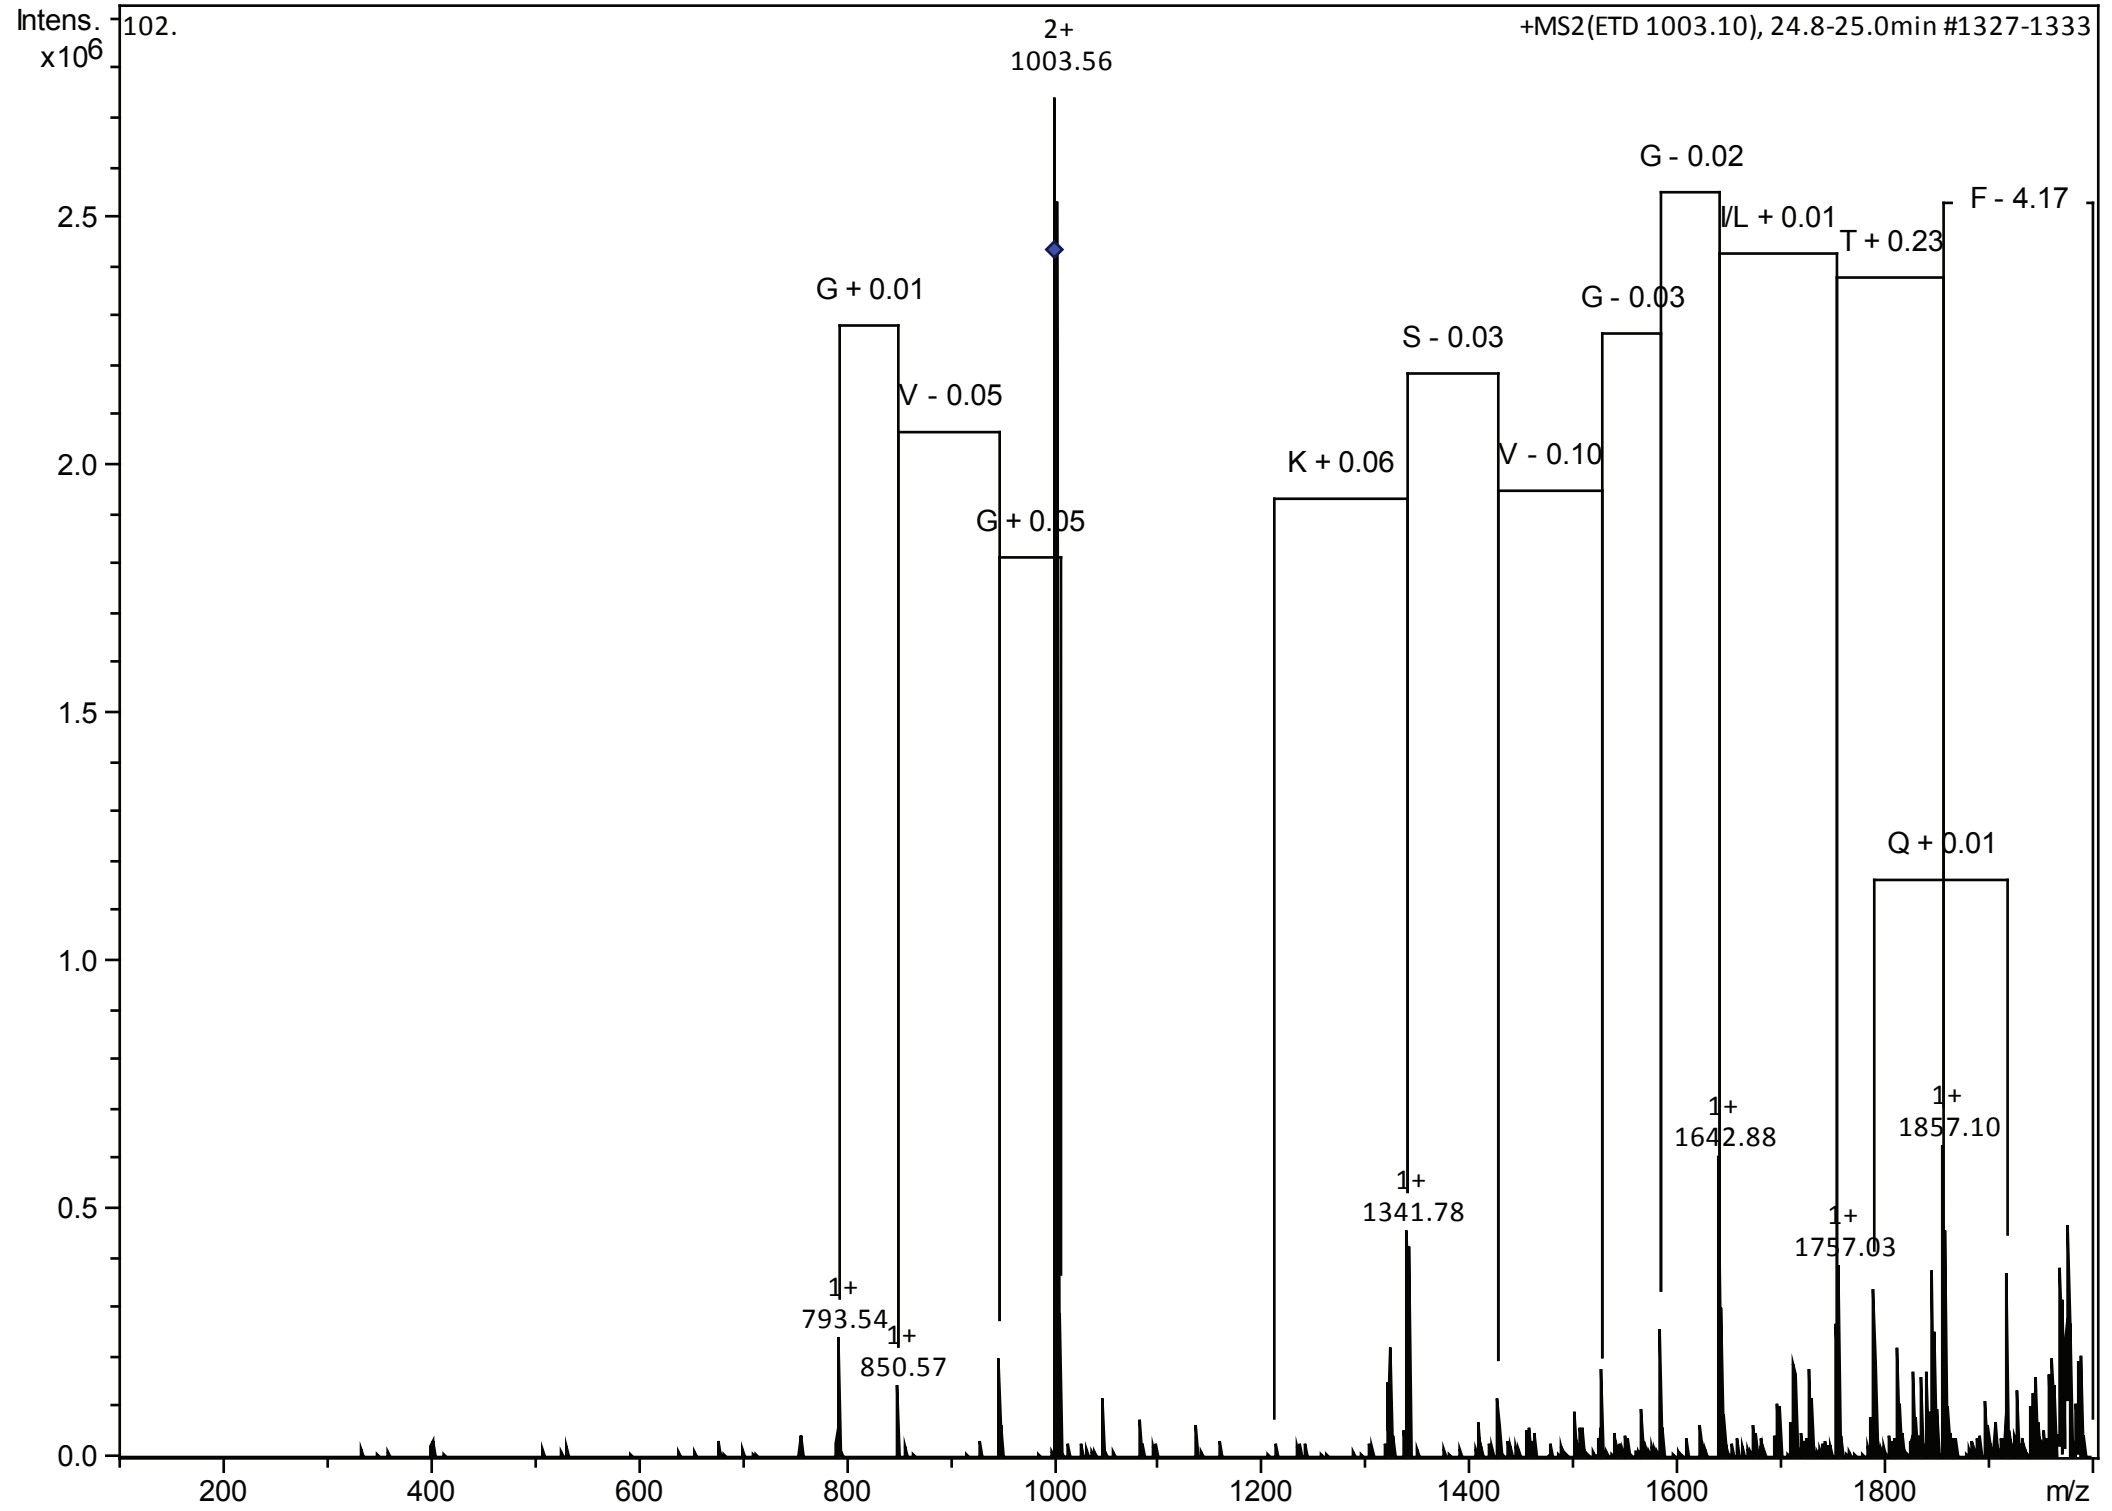

T  
CID

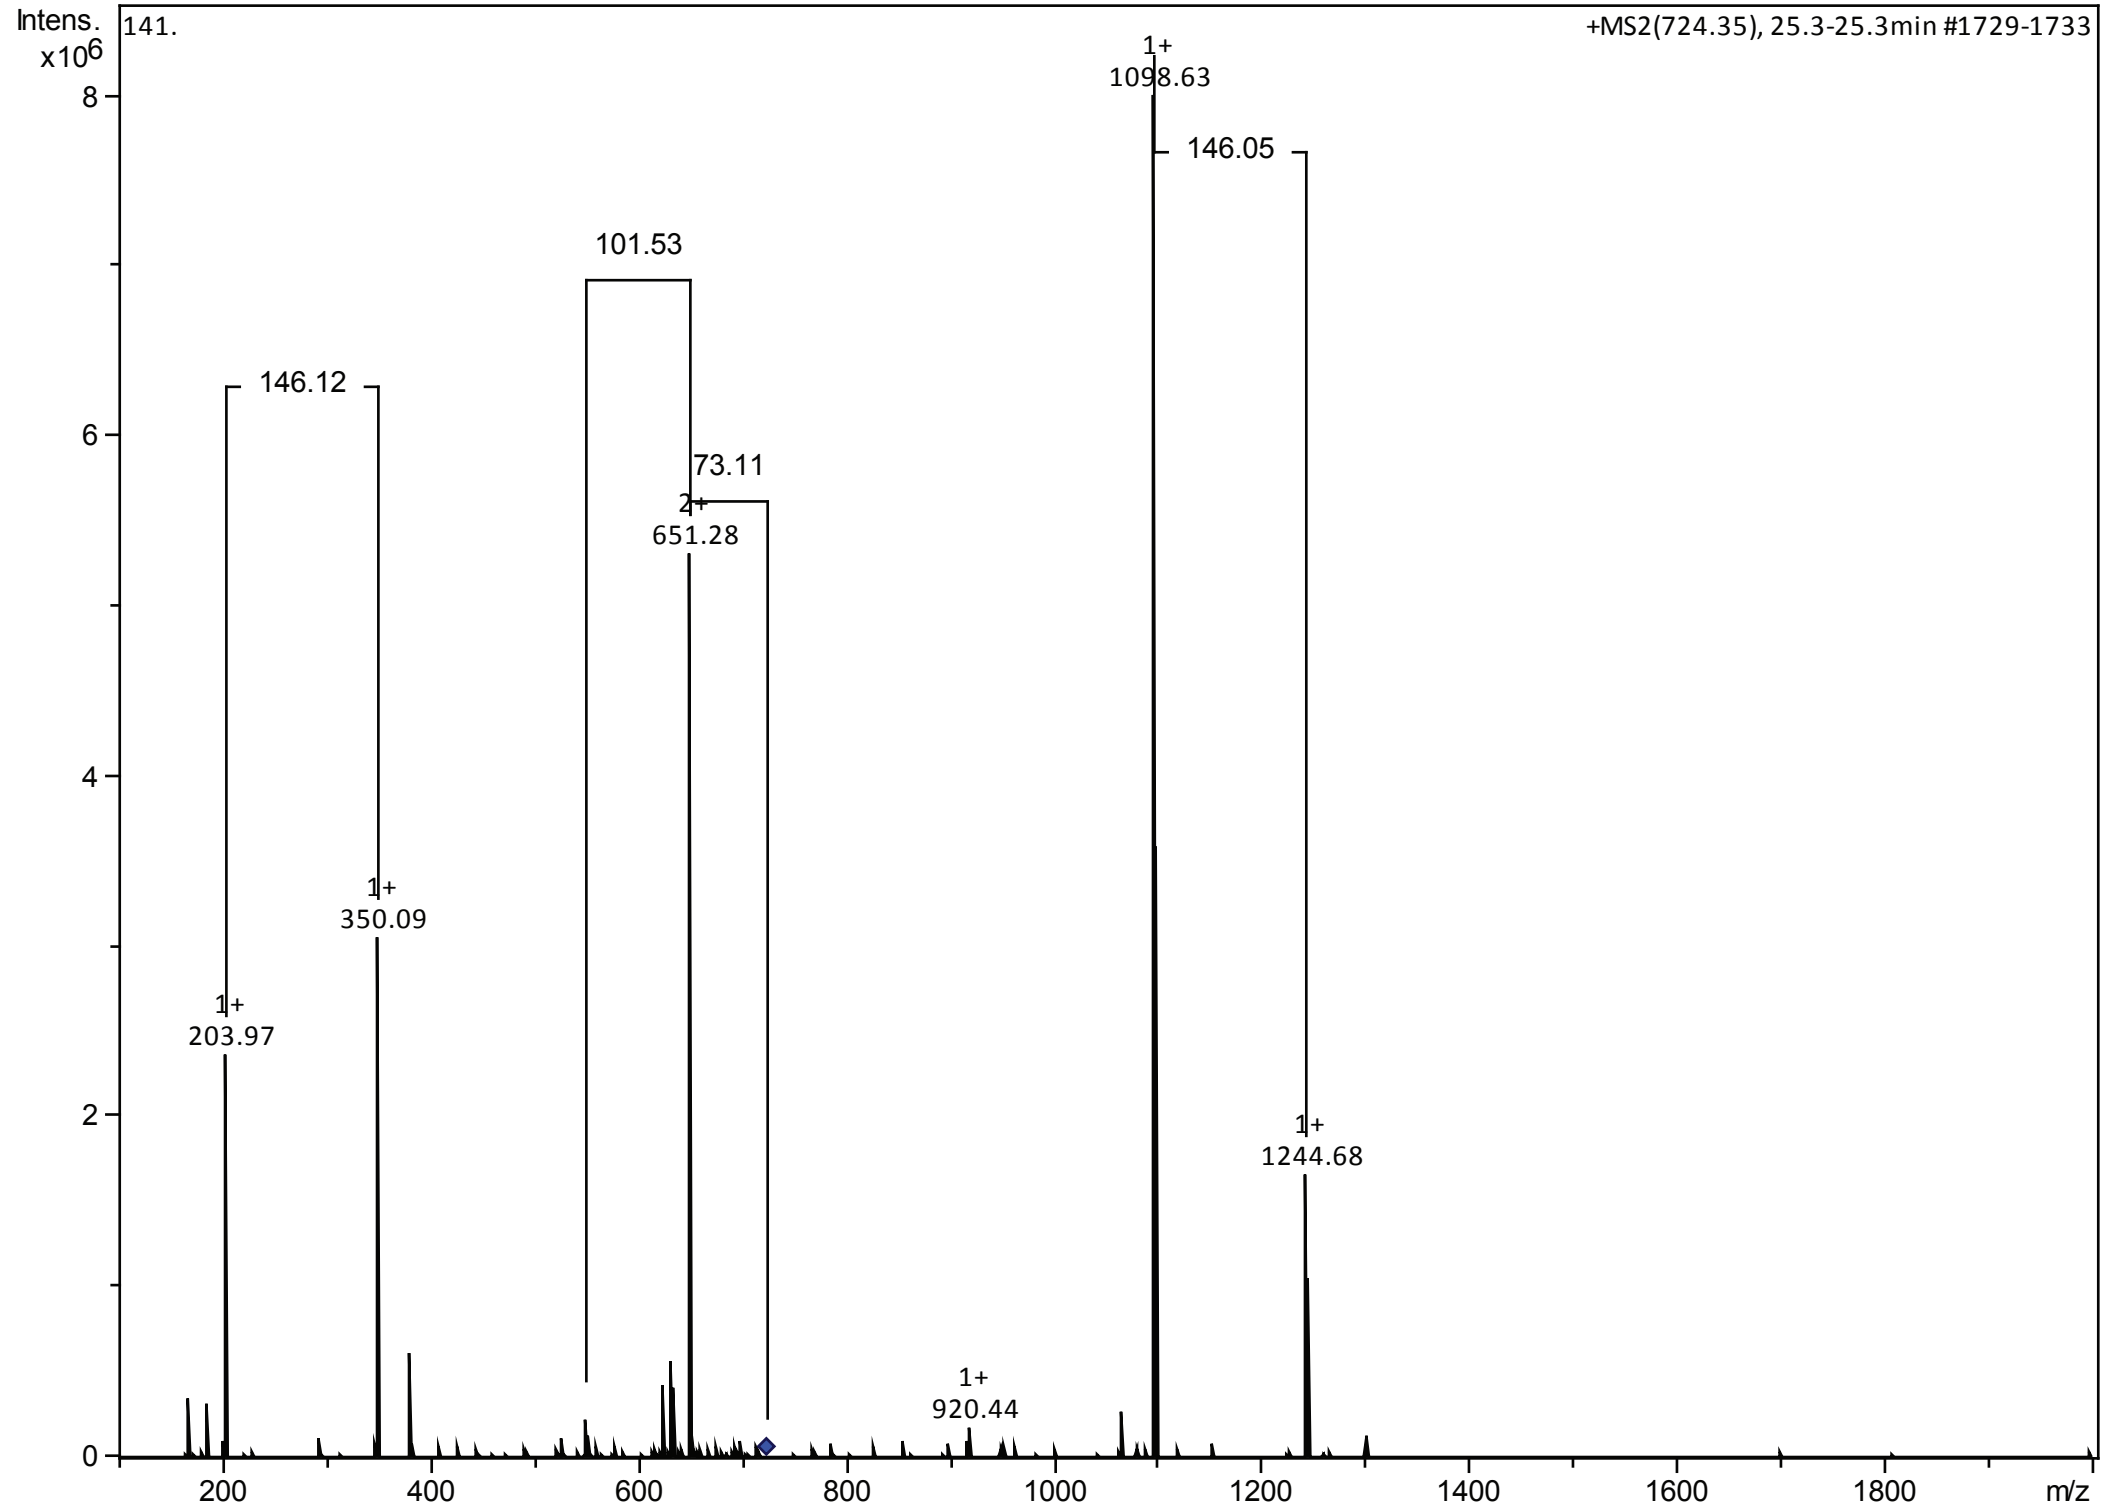

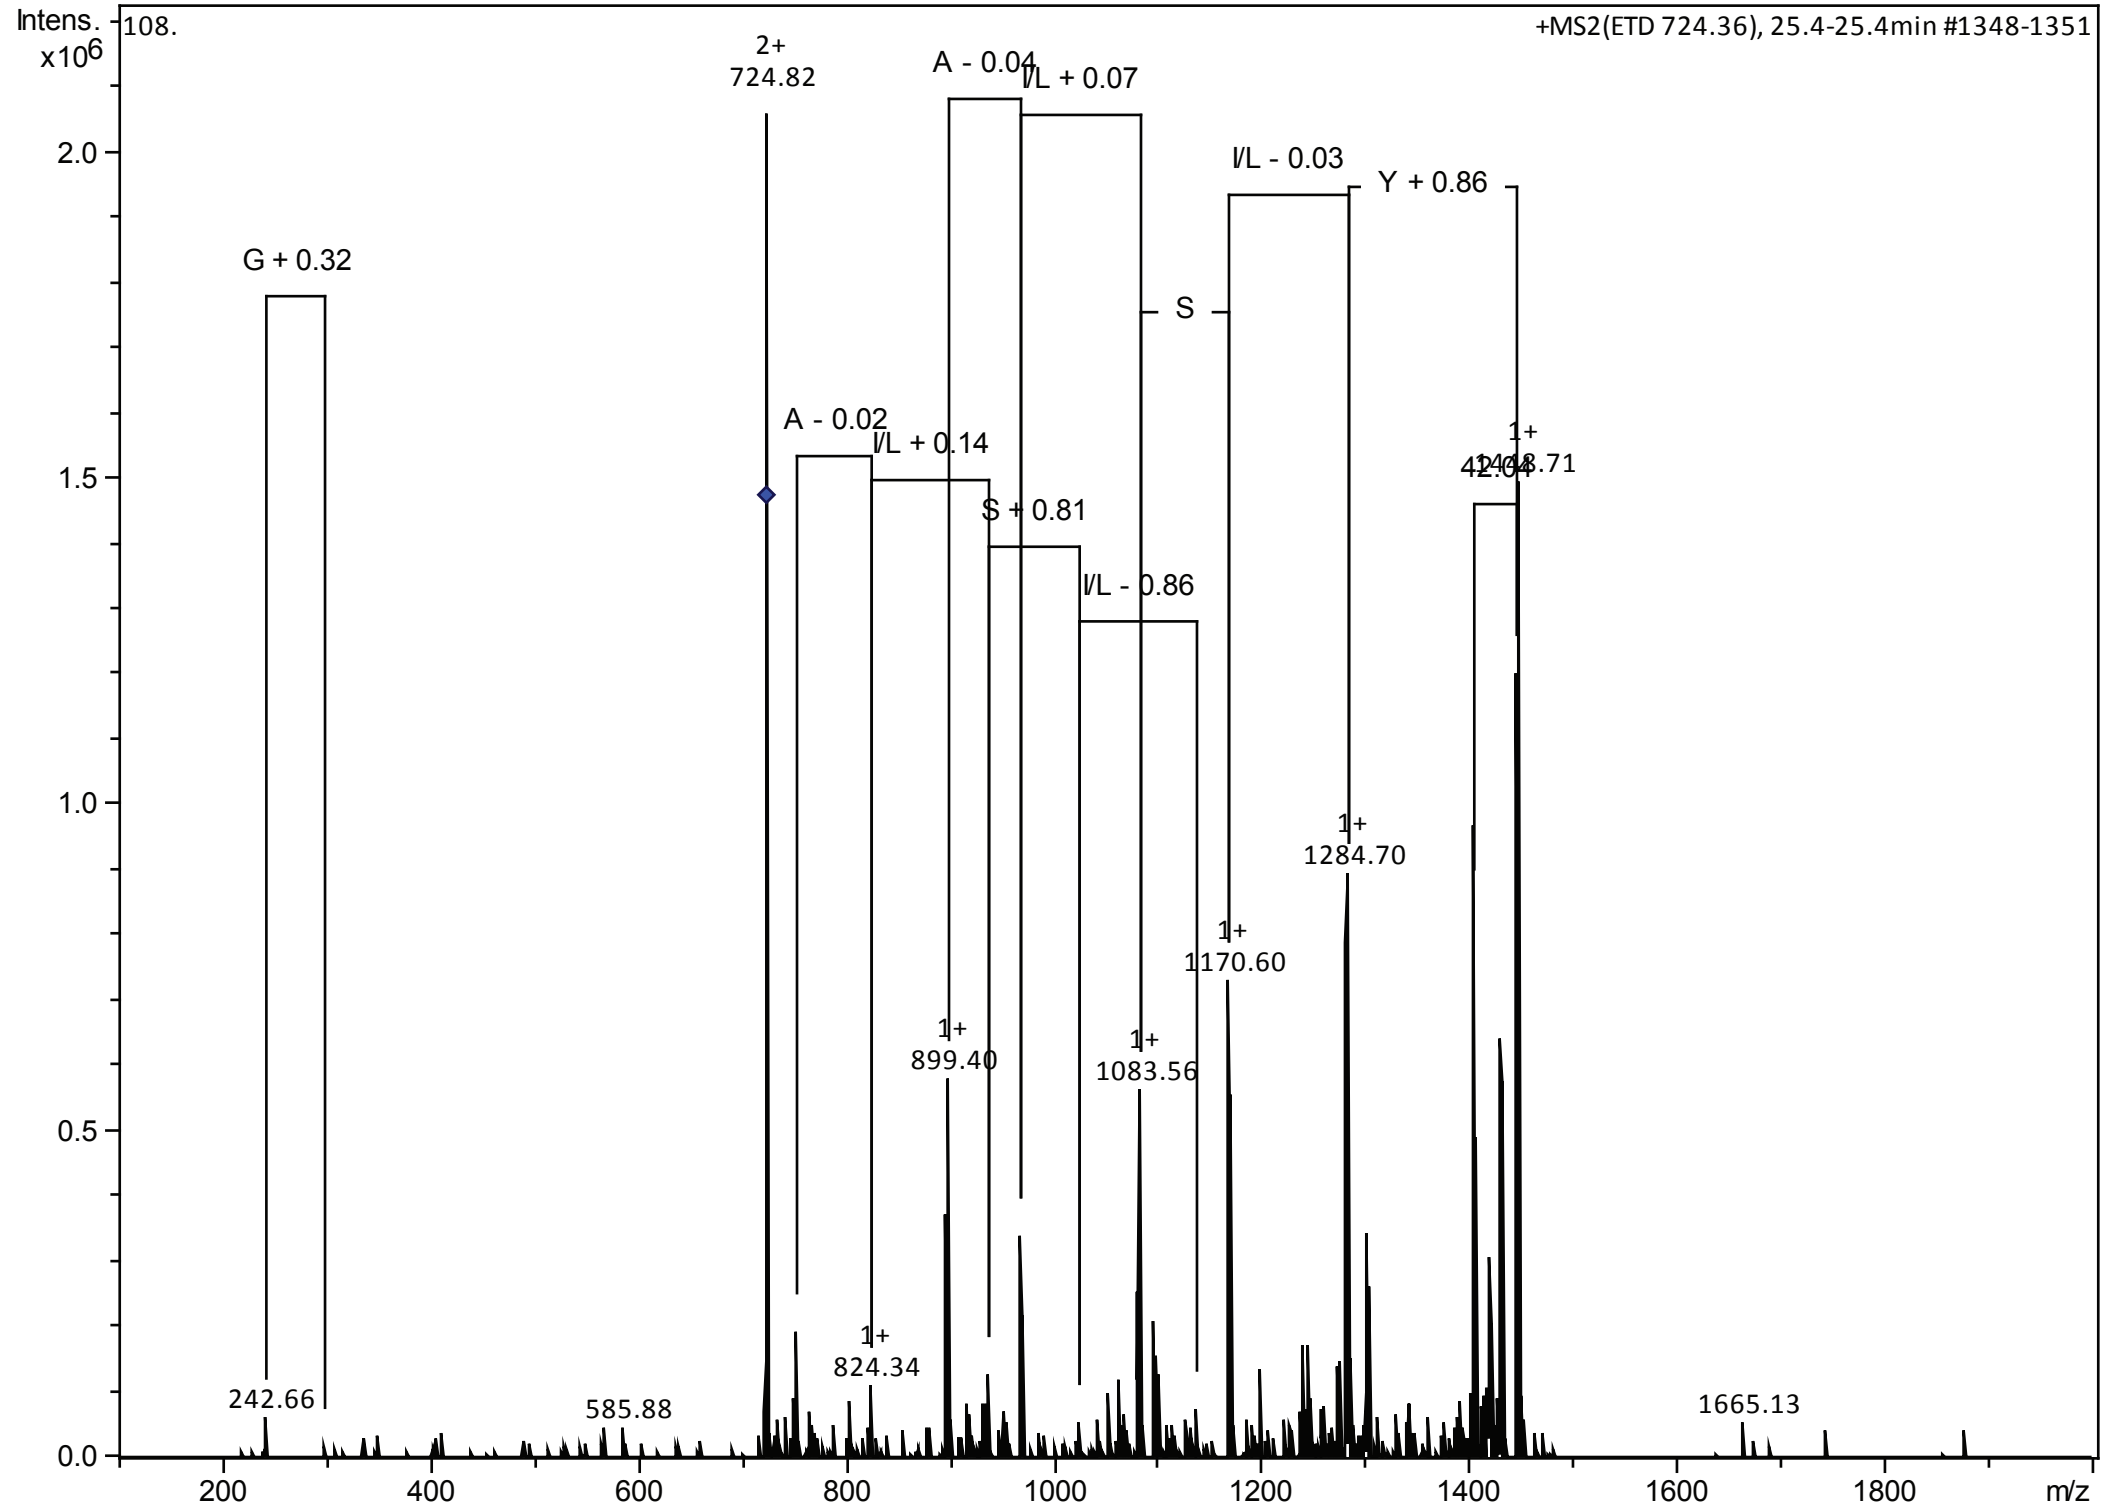

T  
ETD



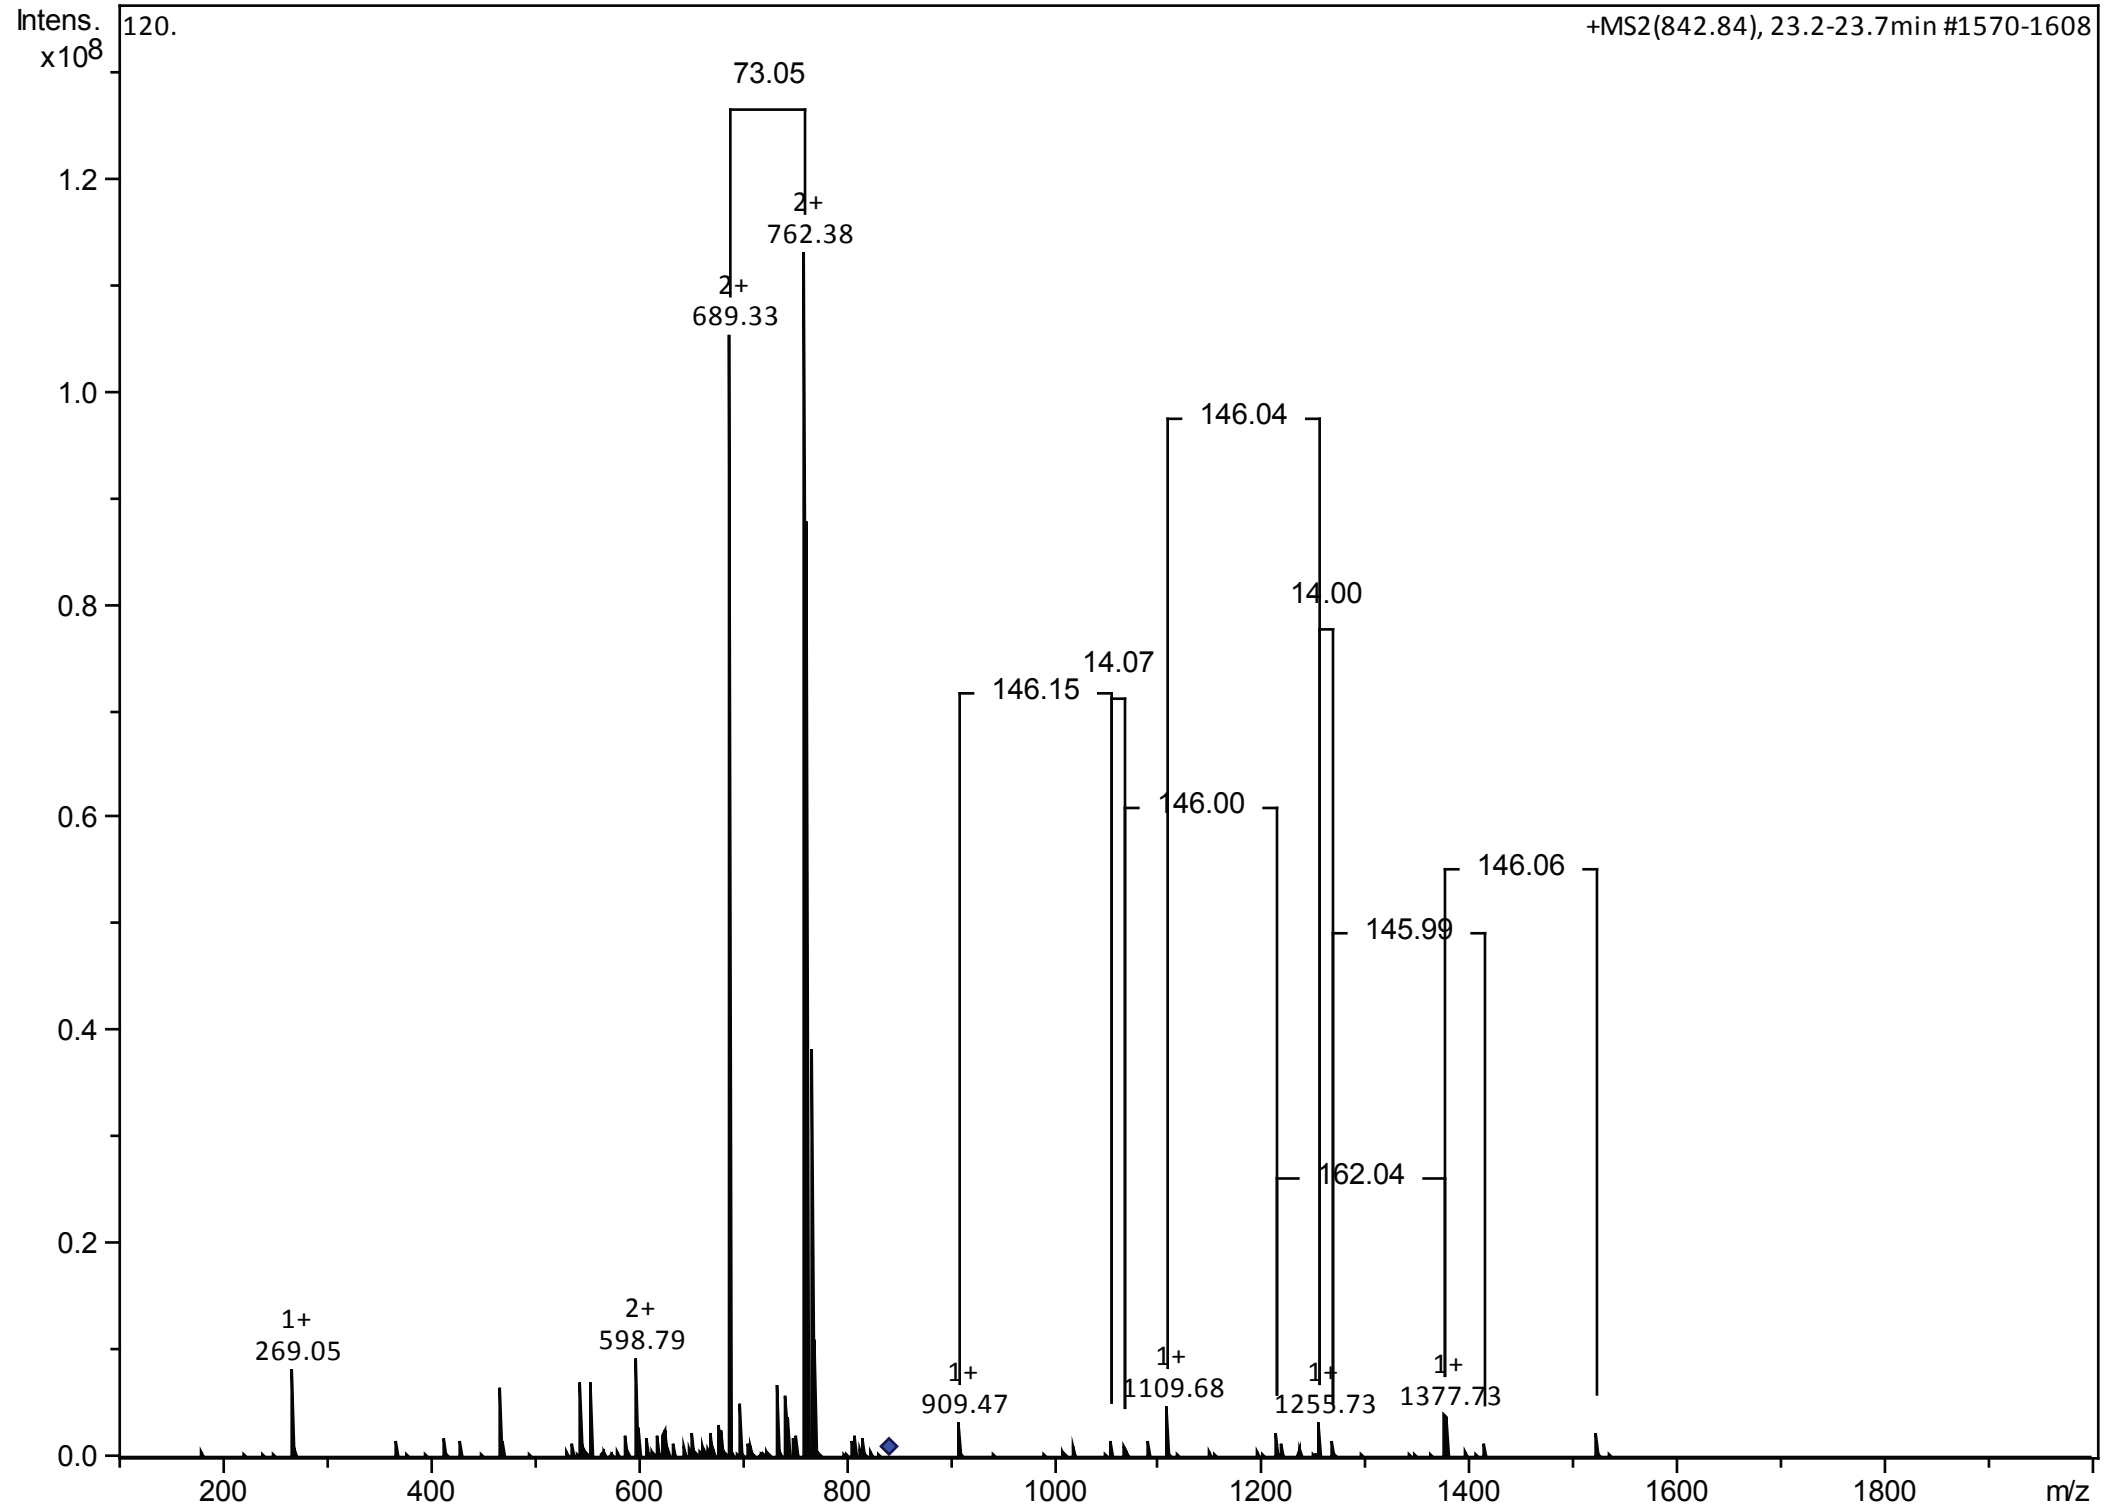

U  
CID

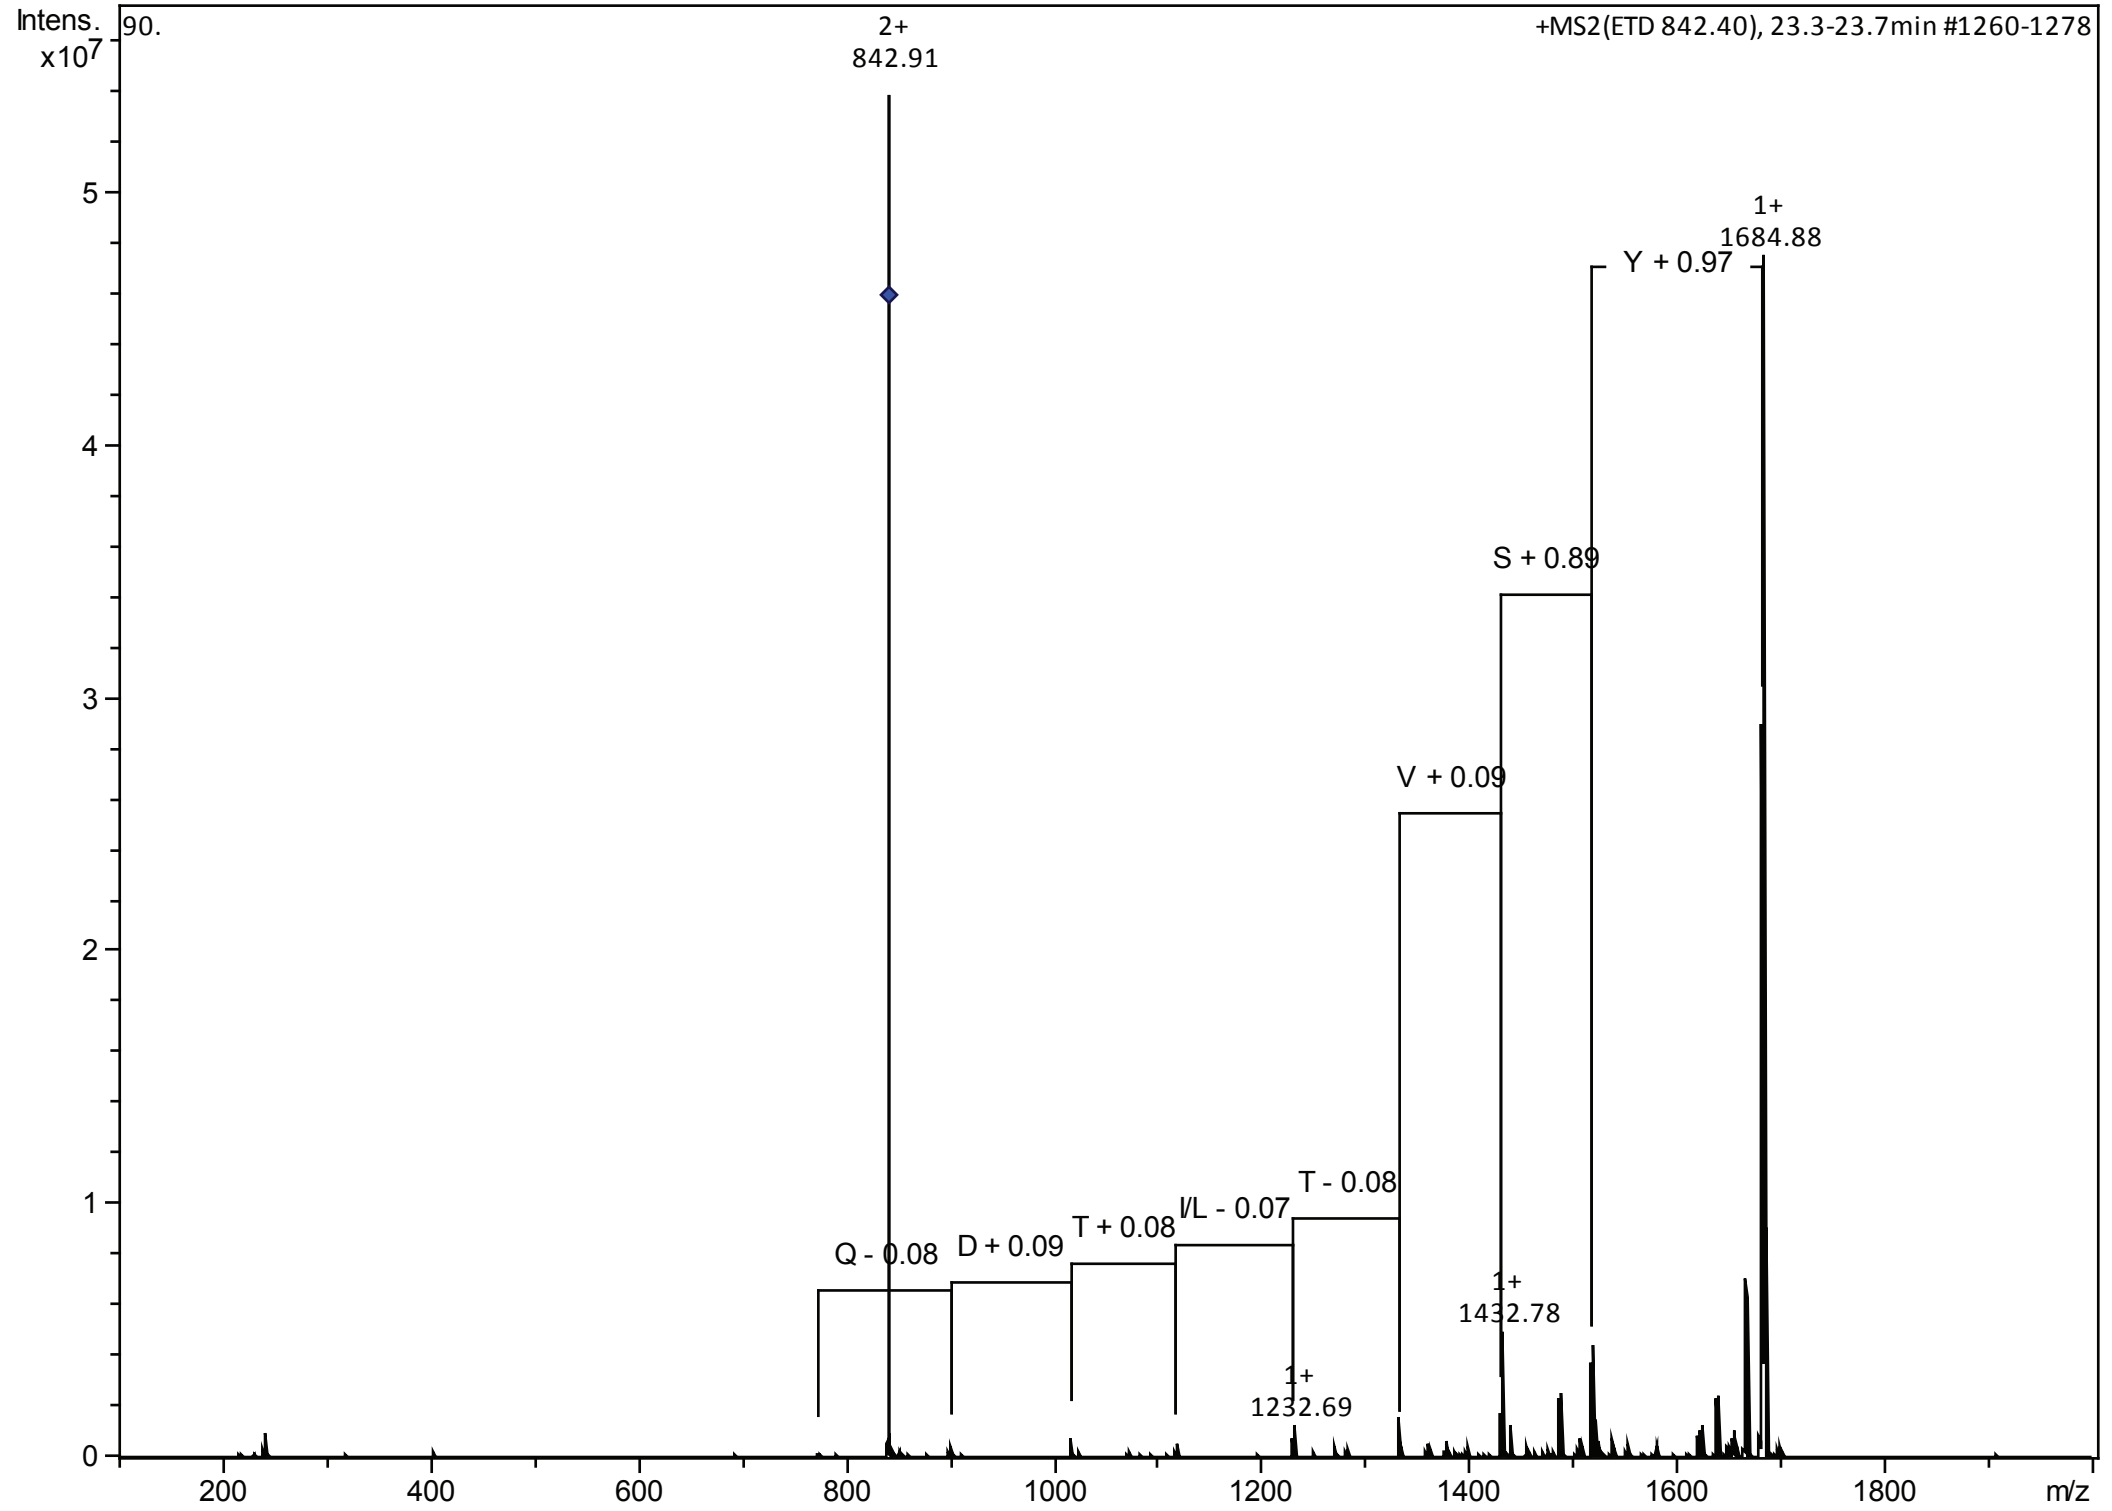

U  
ETD

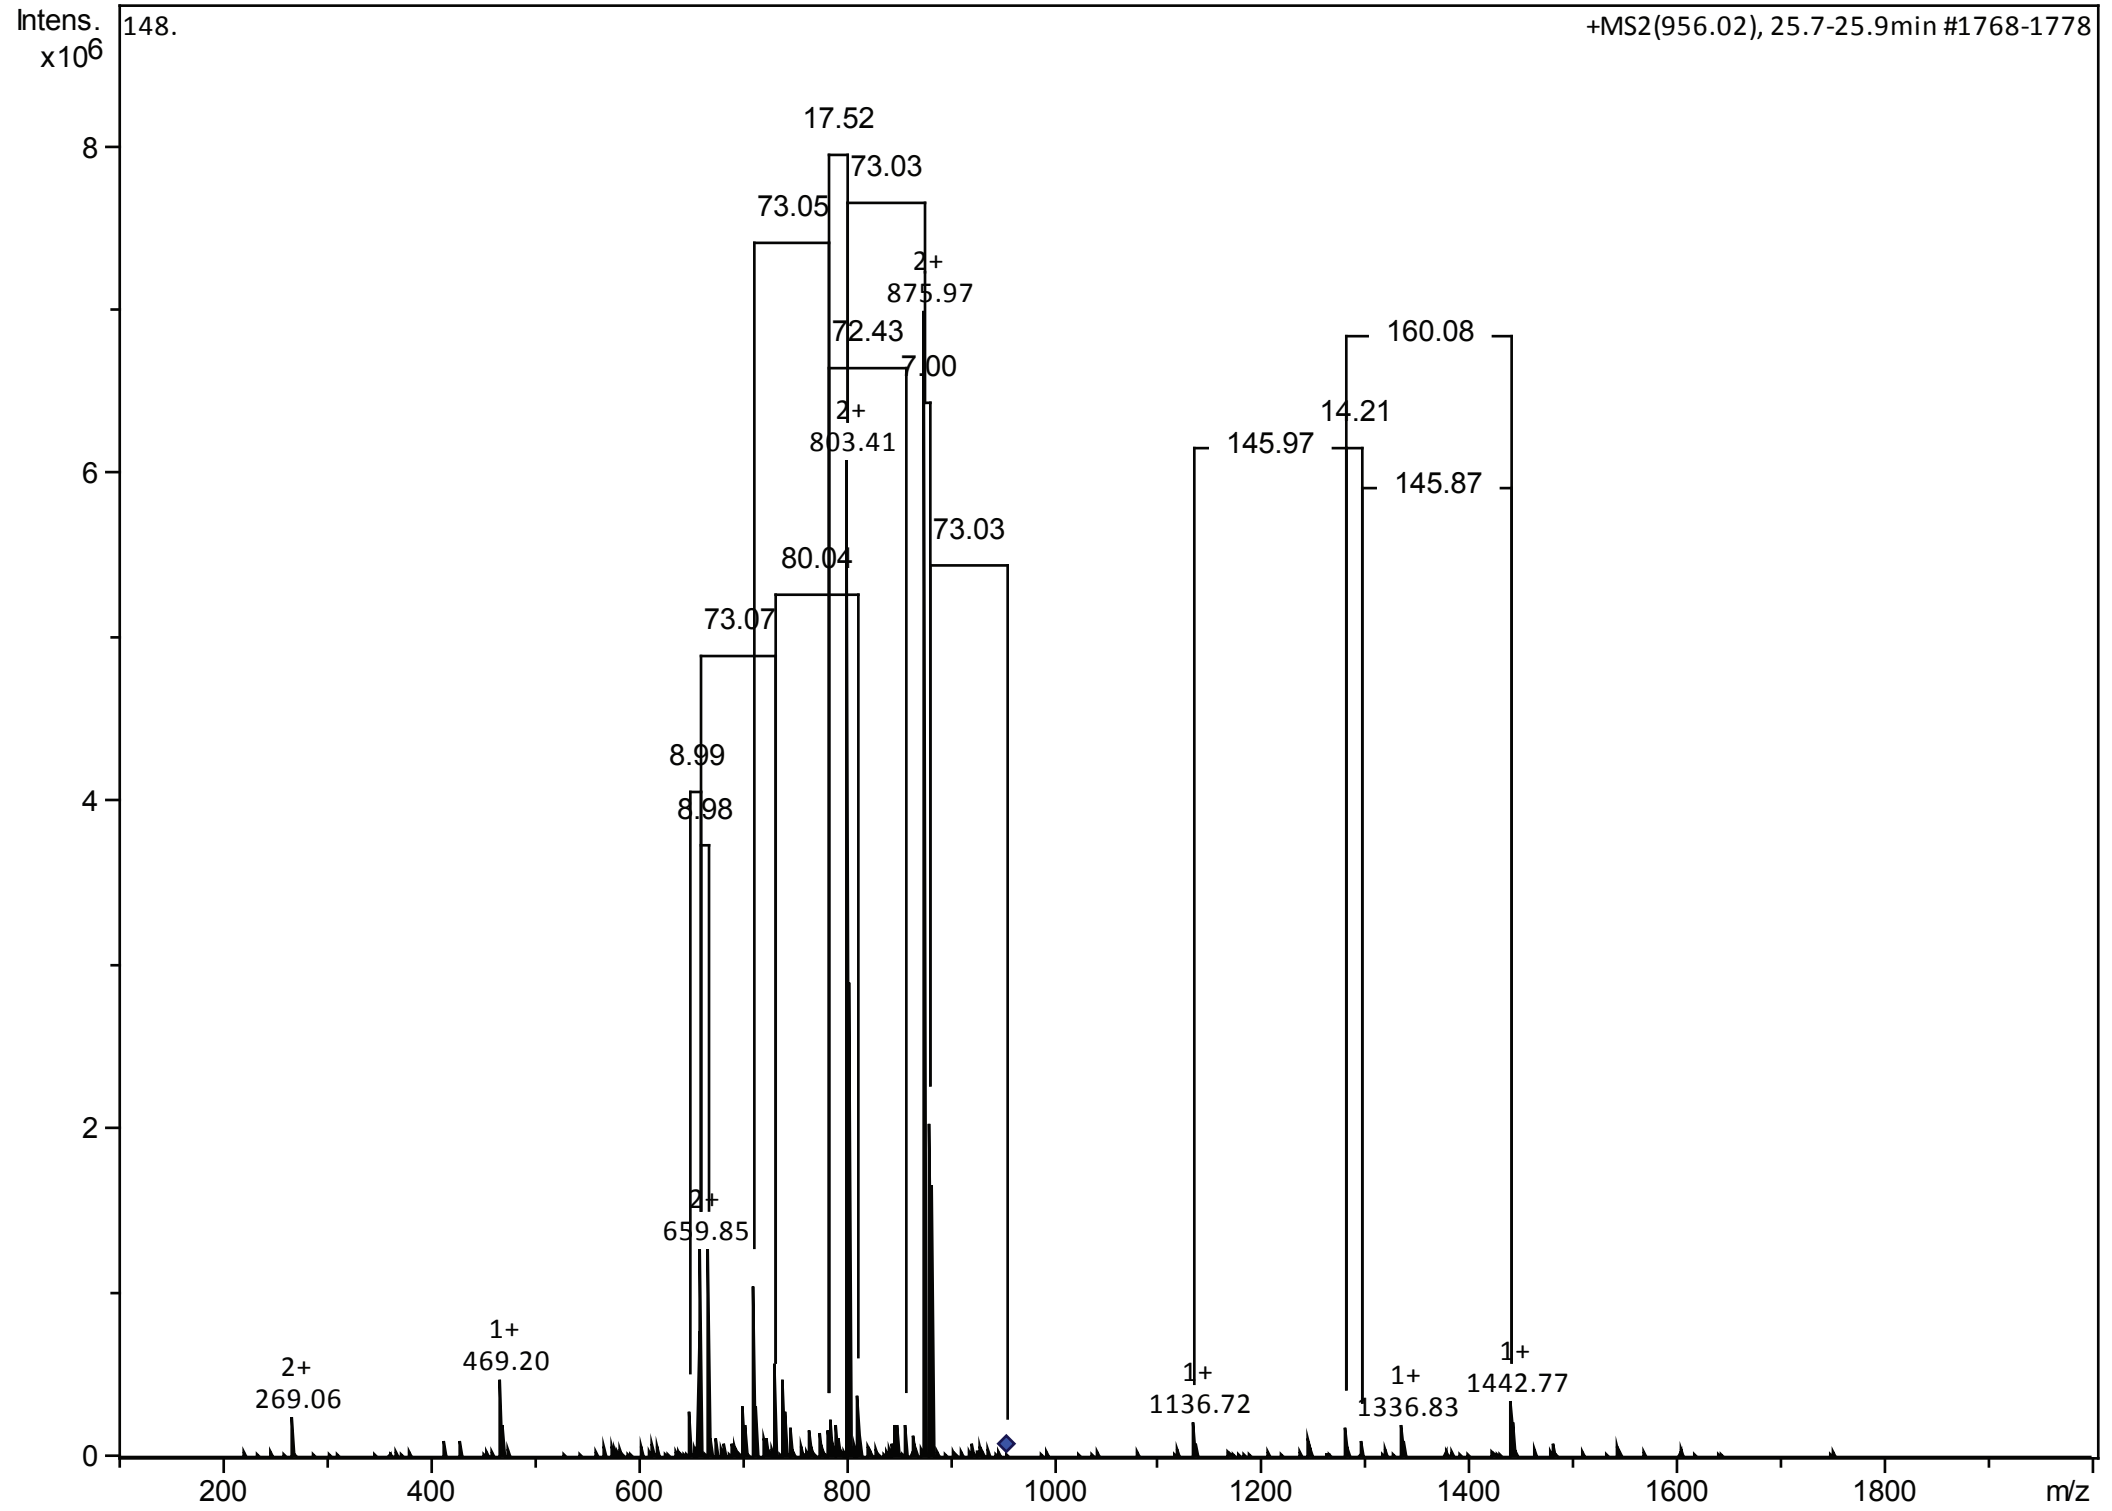

V  
CID

+MS2(956.02), 25.7-25.9min #1768-1778

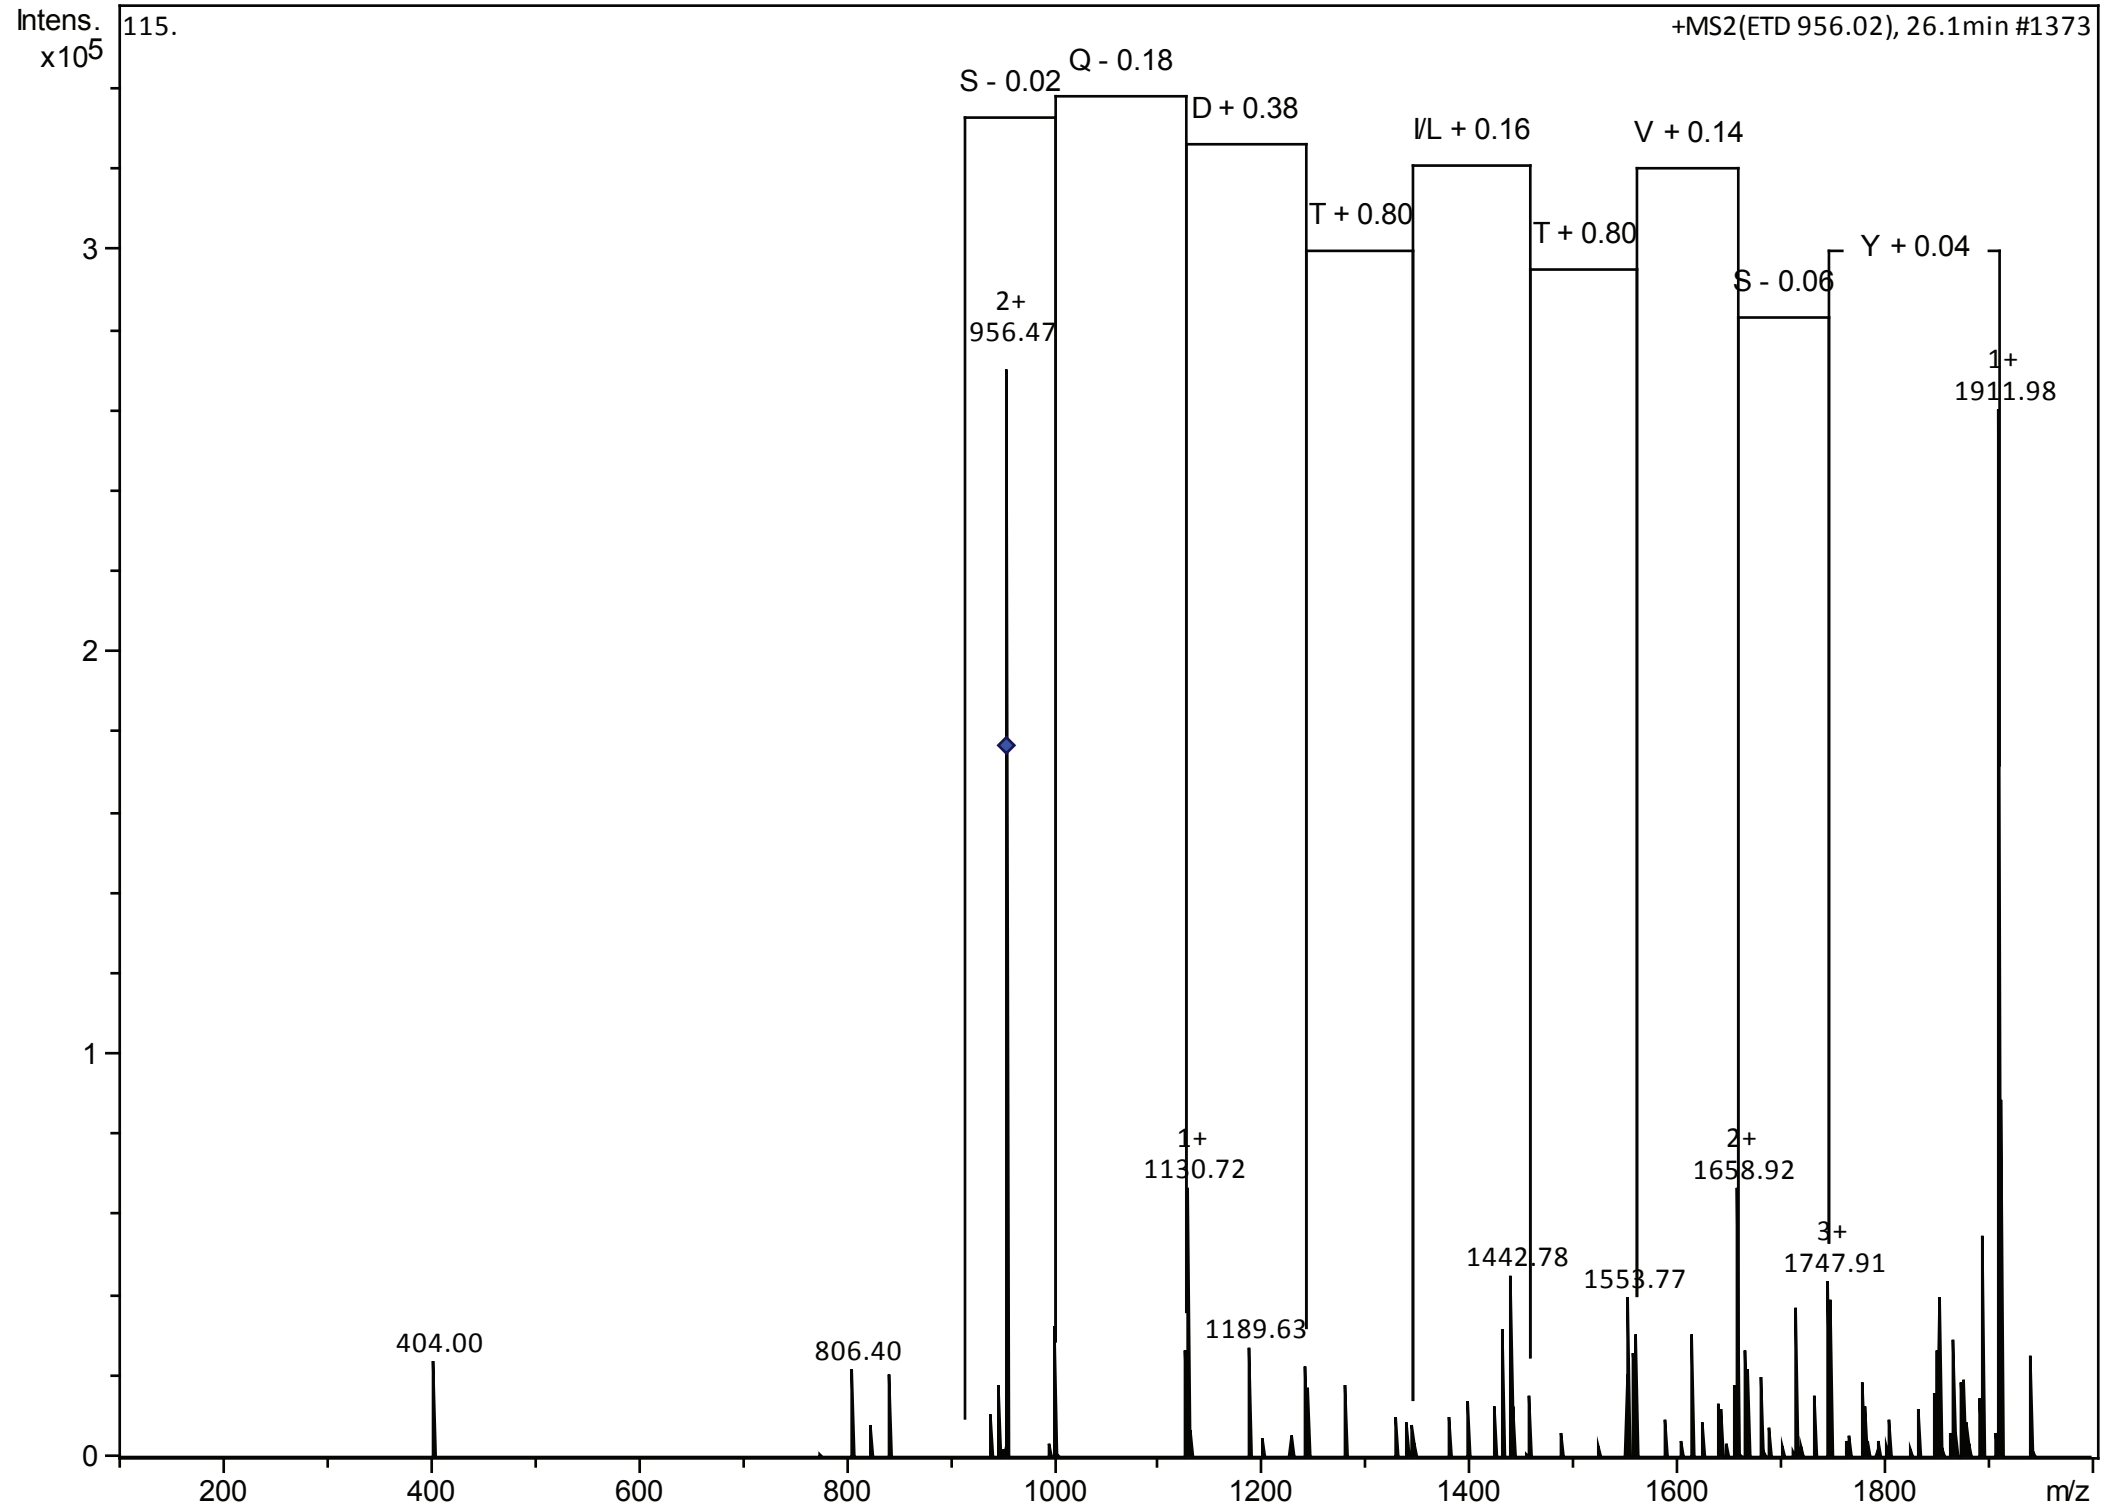

V  
ETD

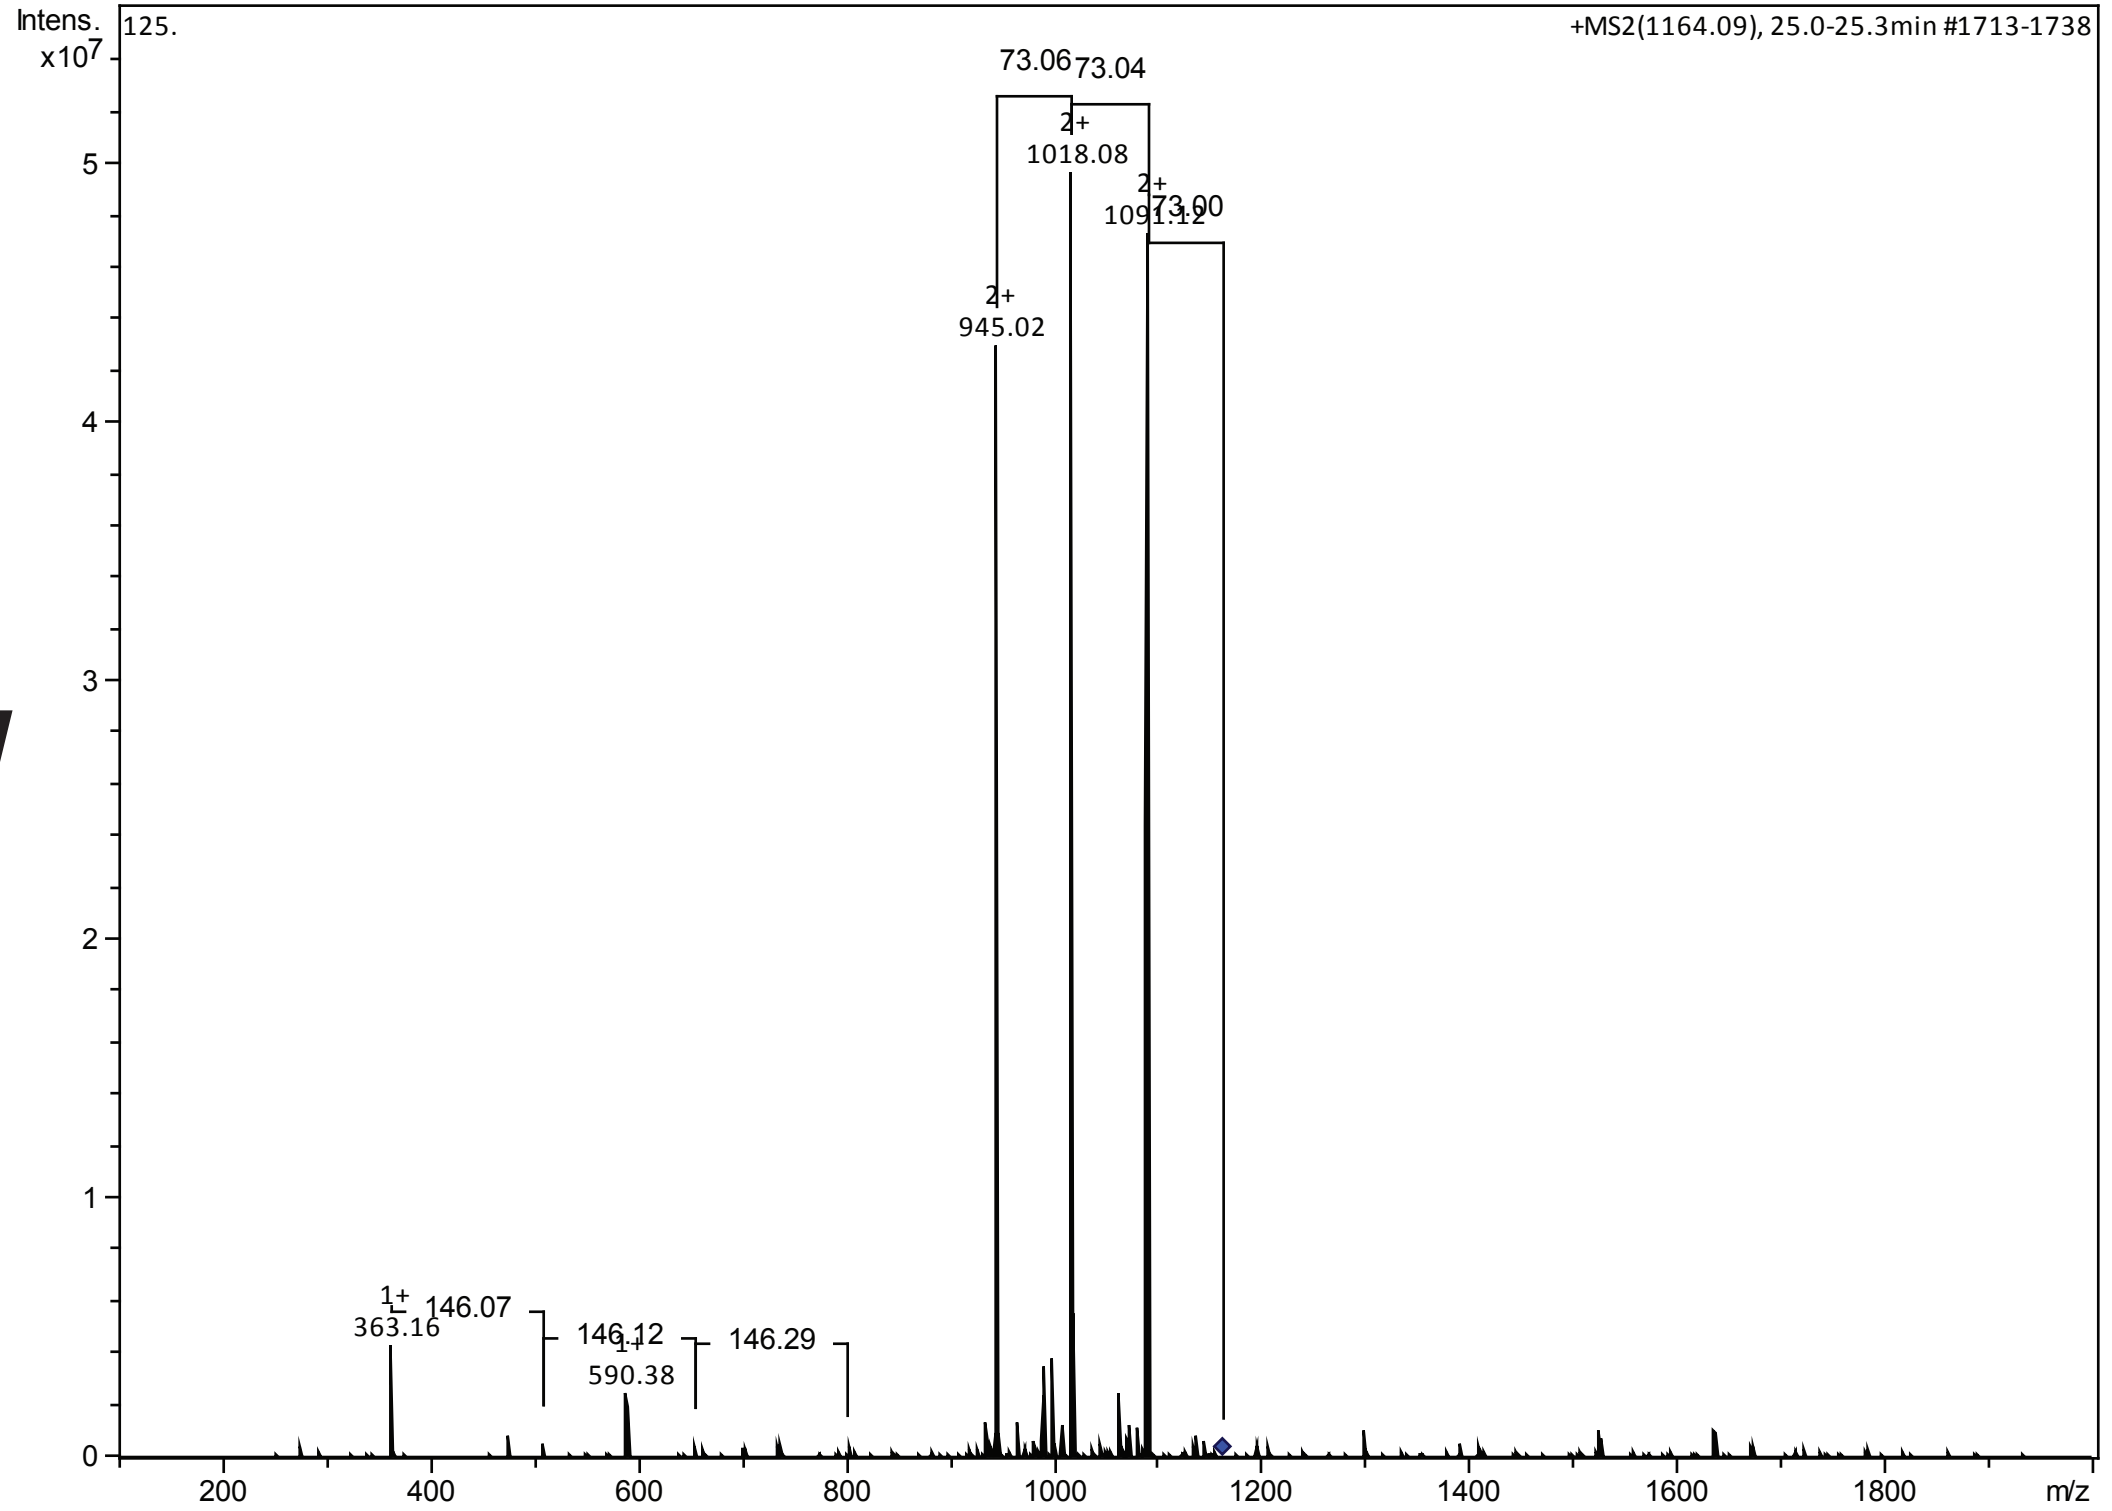

W  
CID

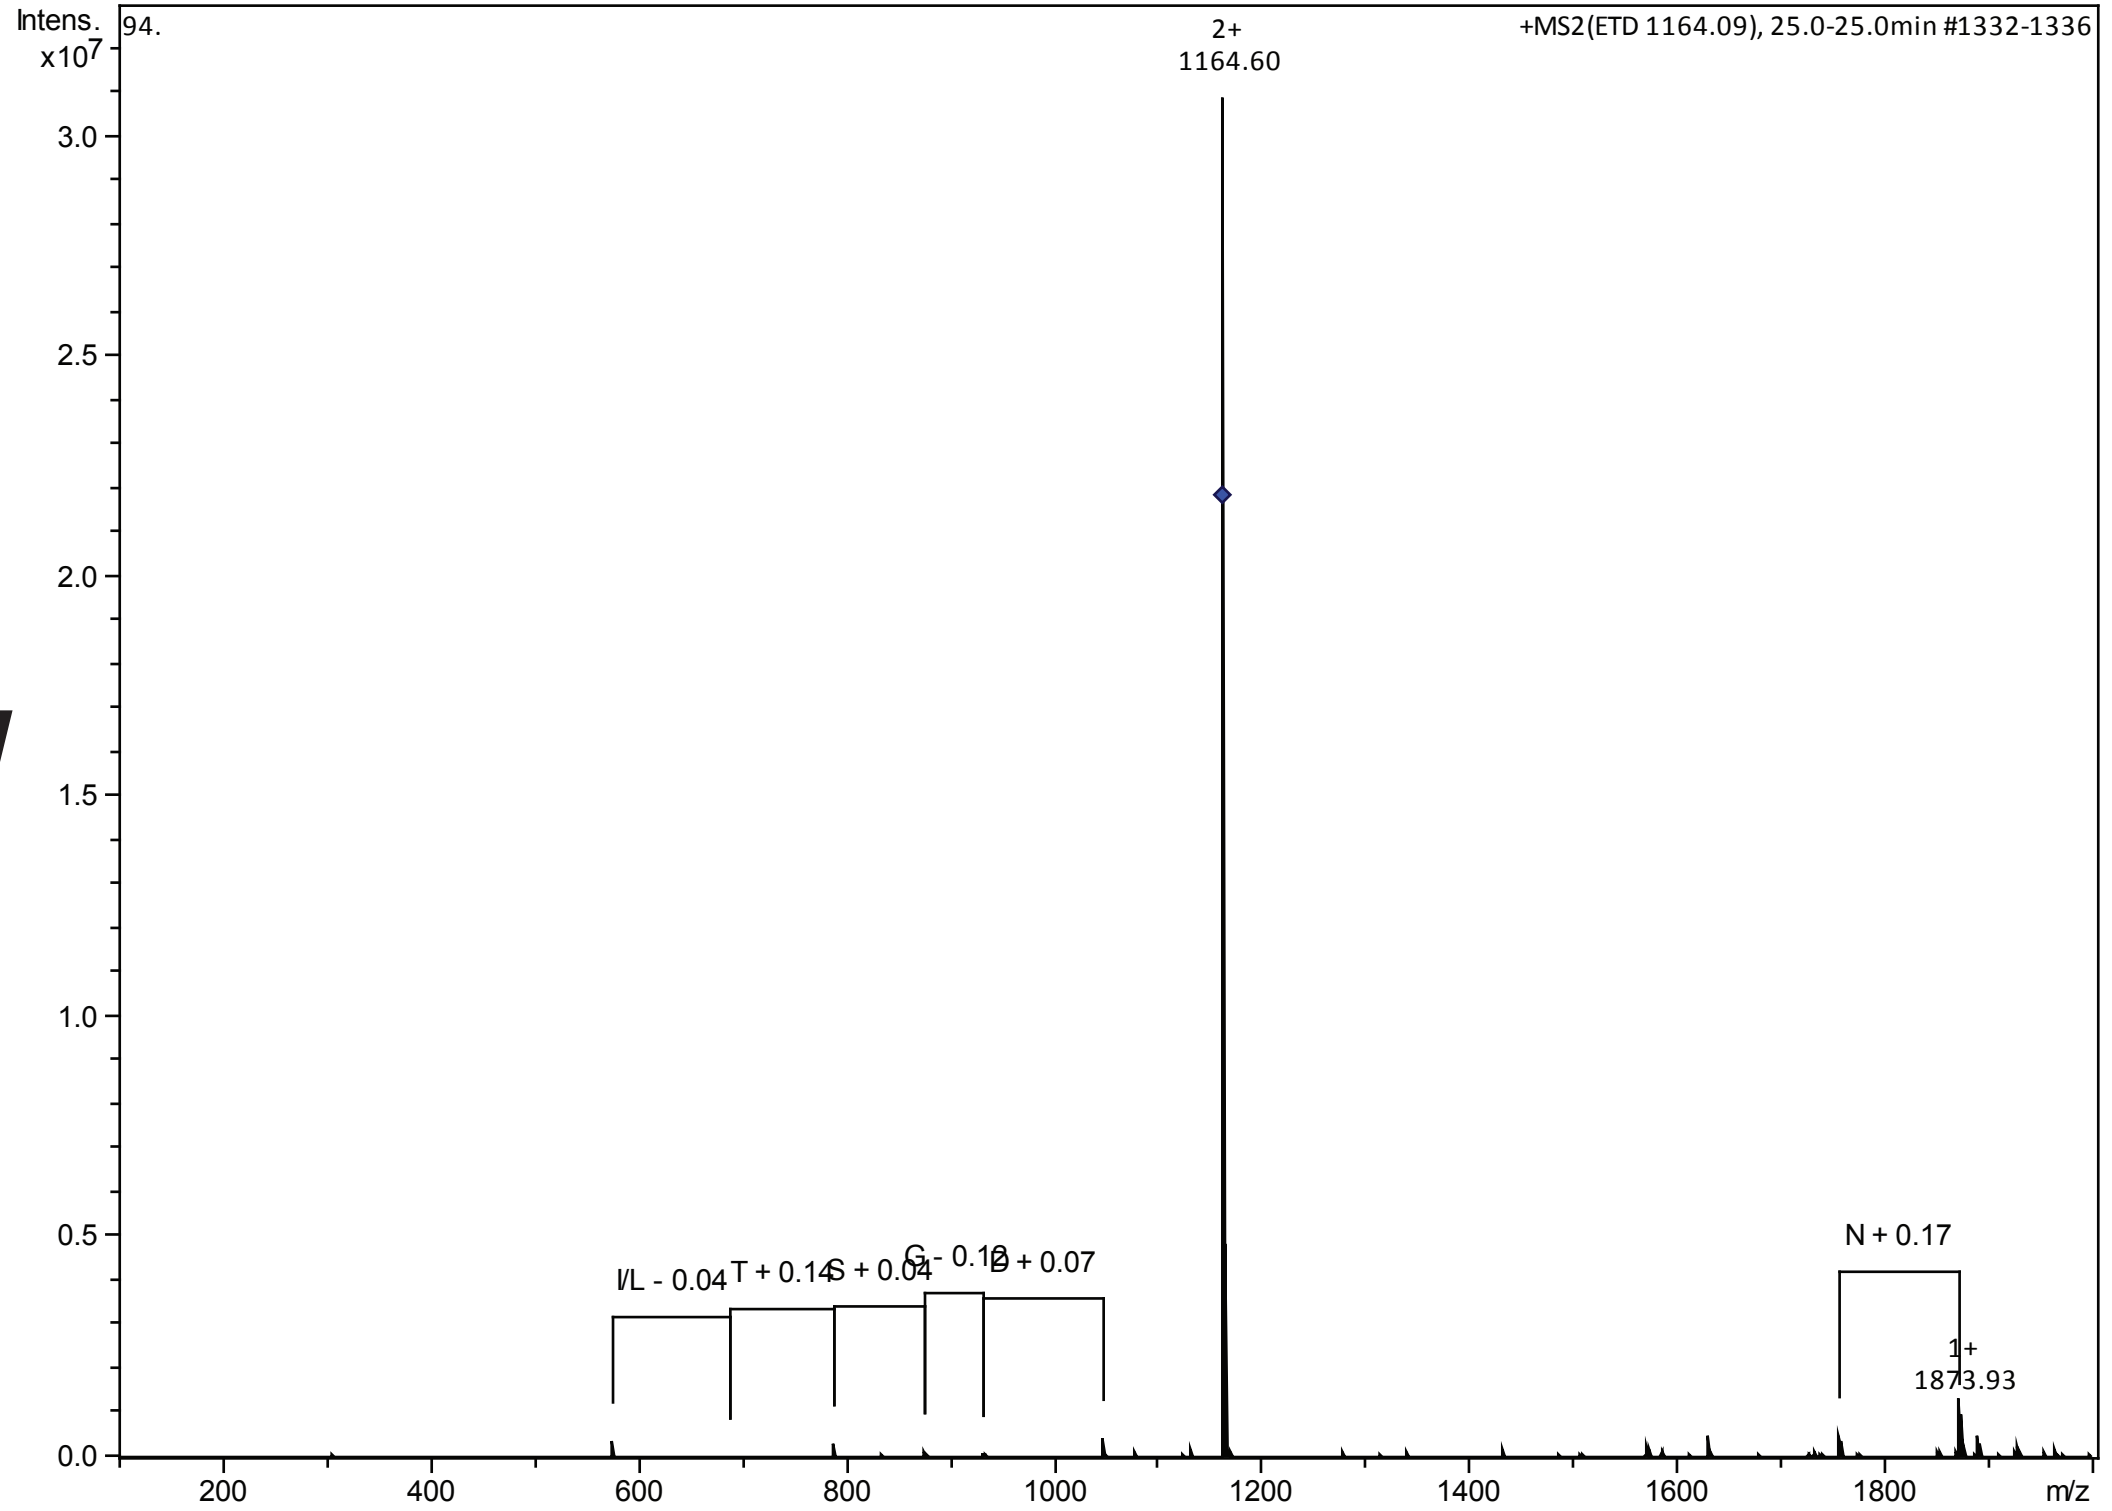

W  
ETD

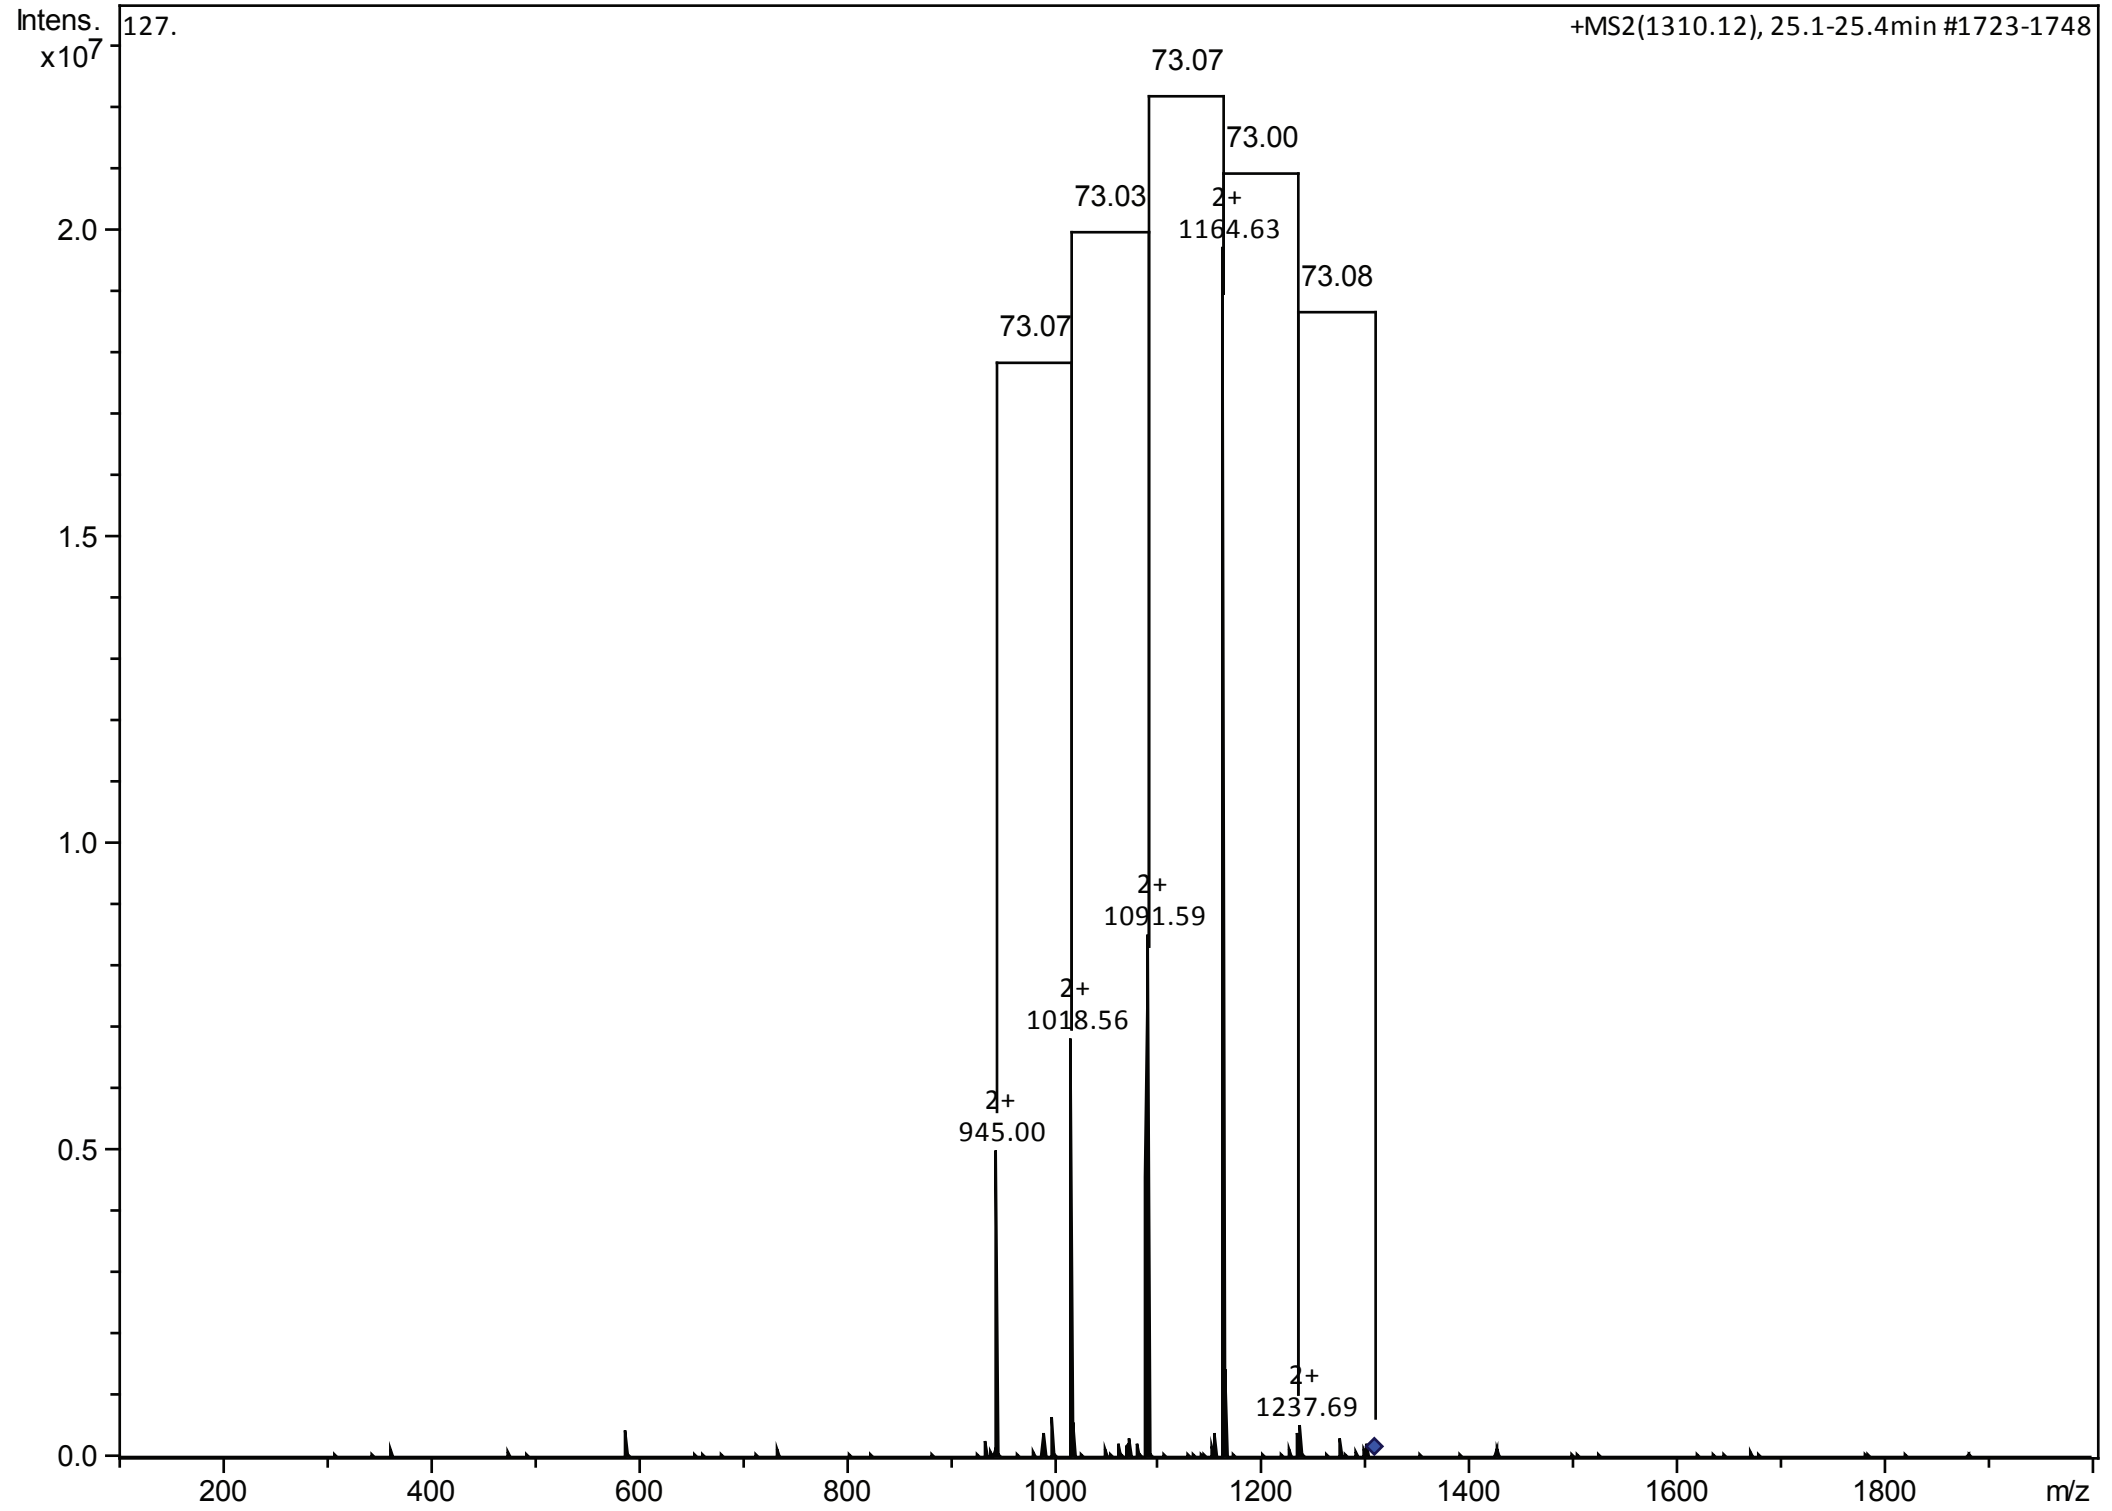

X  
CID

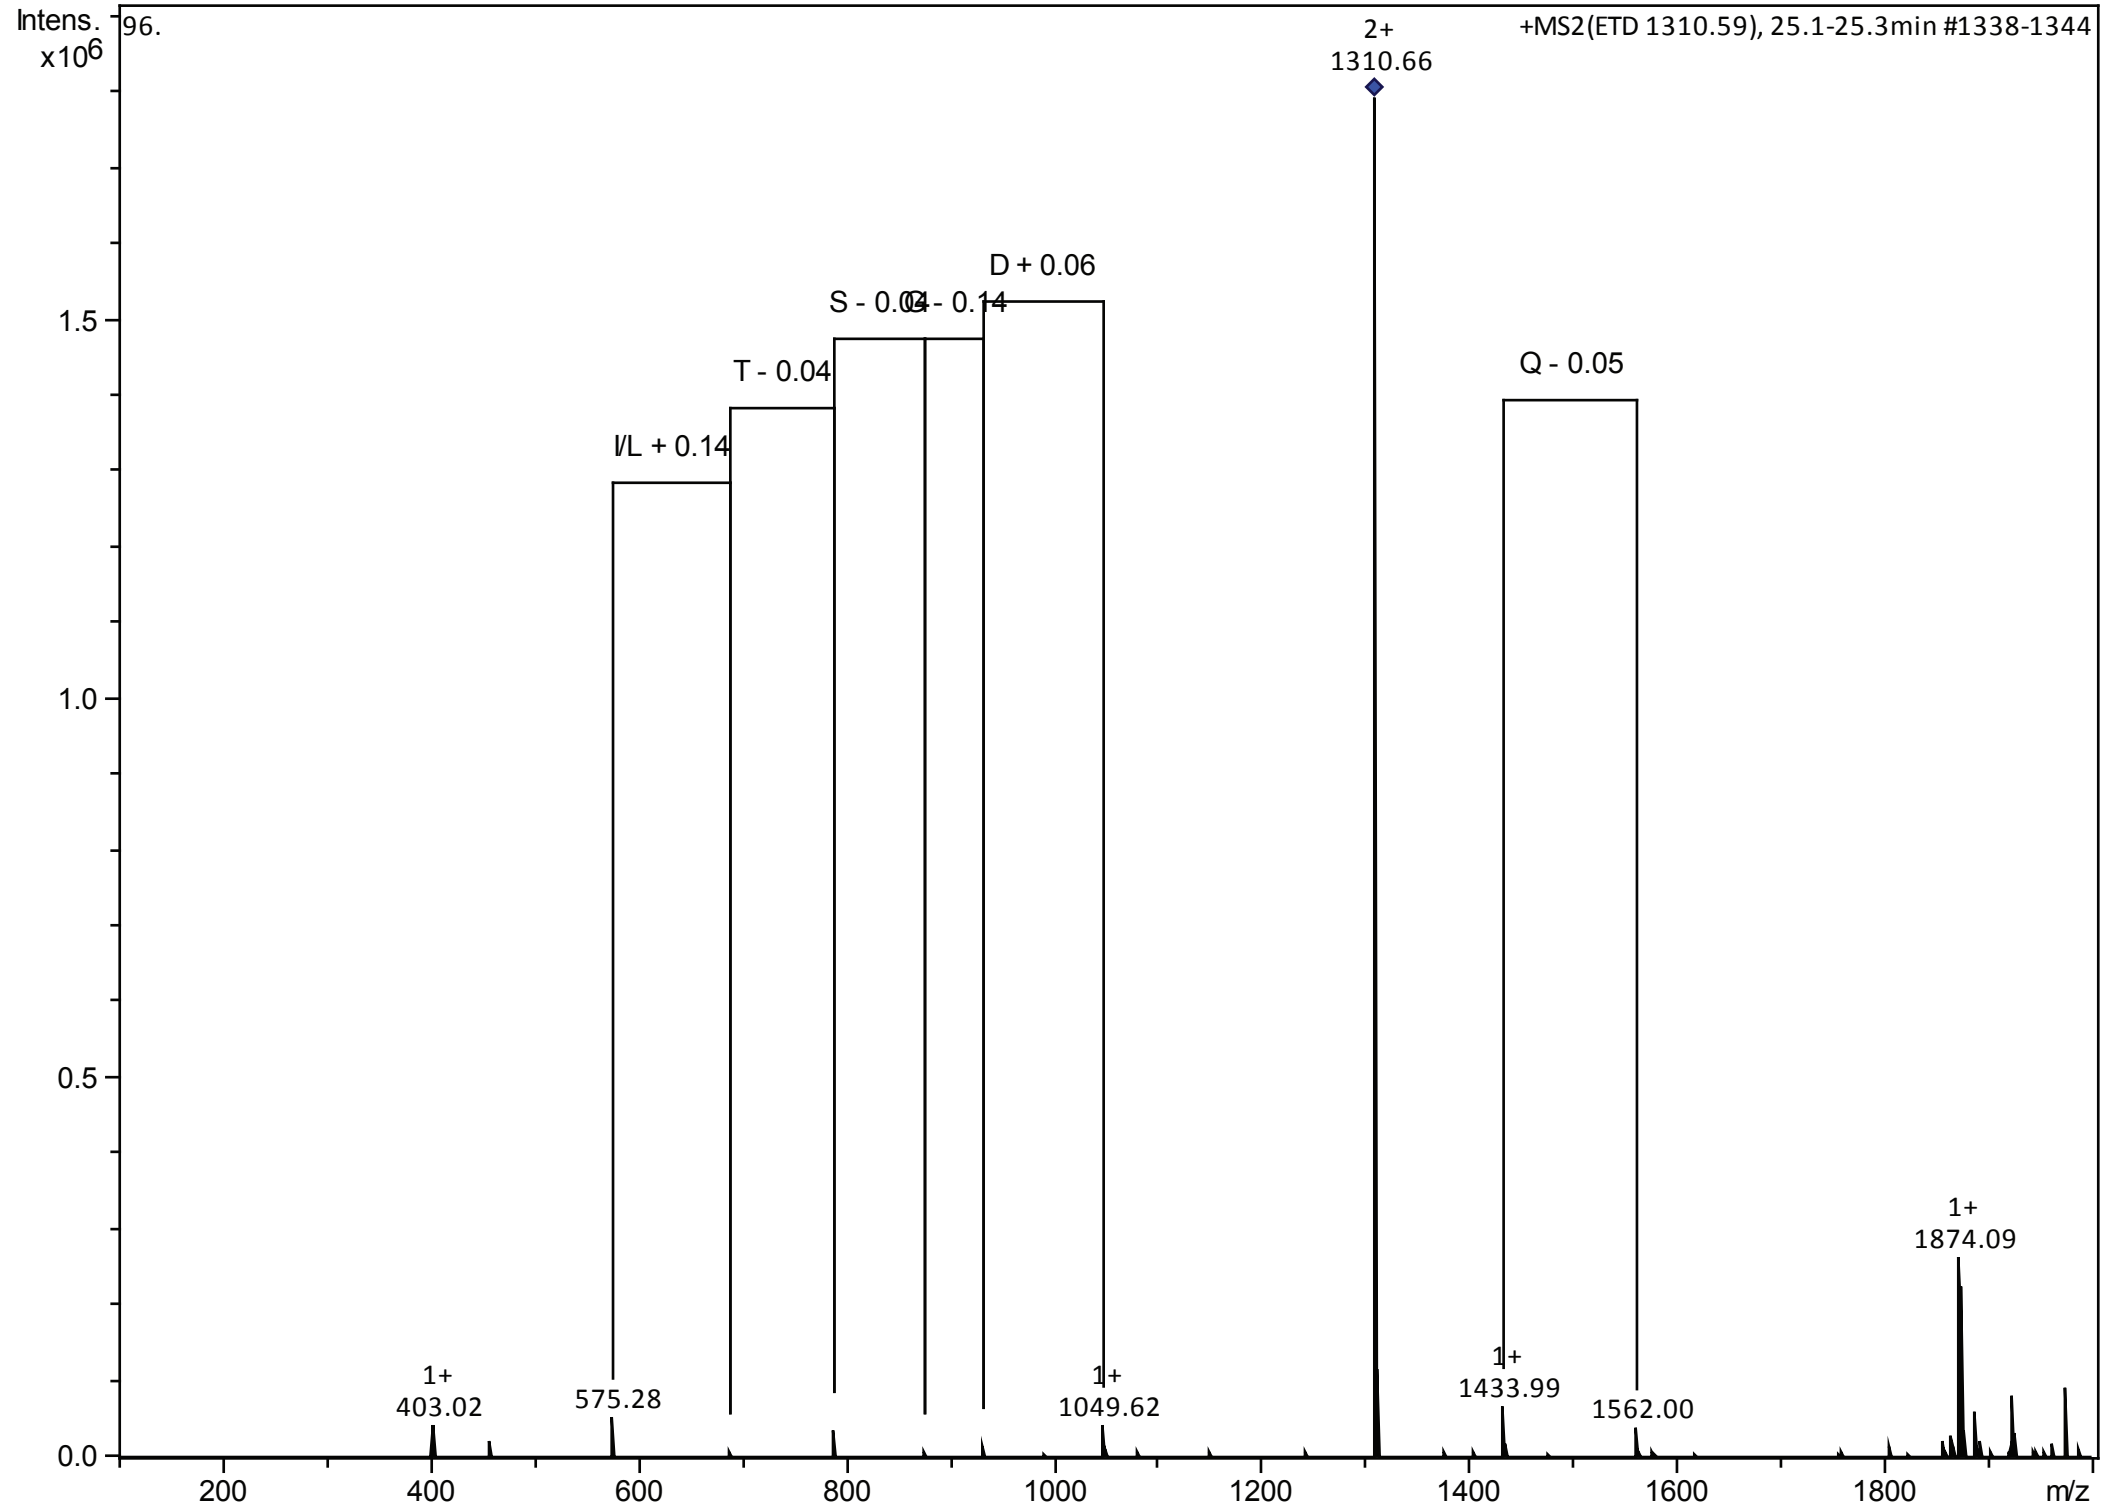

X  
ETD



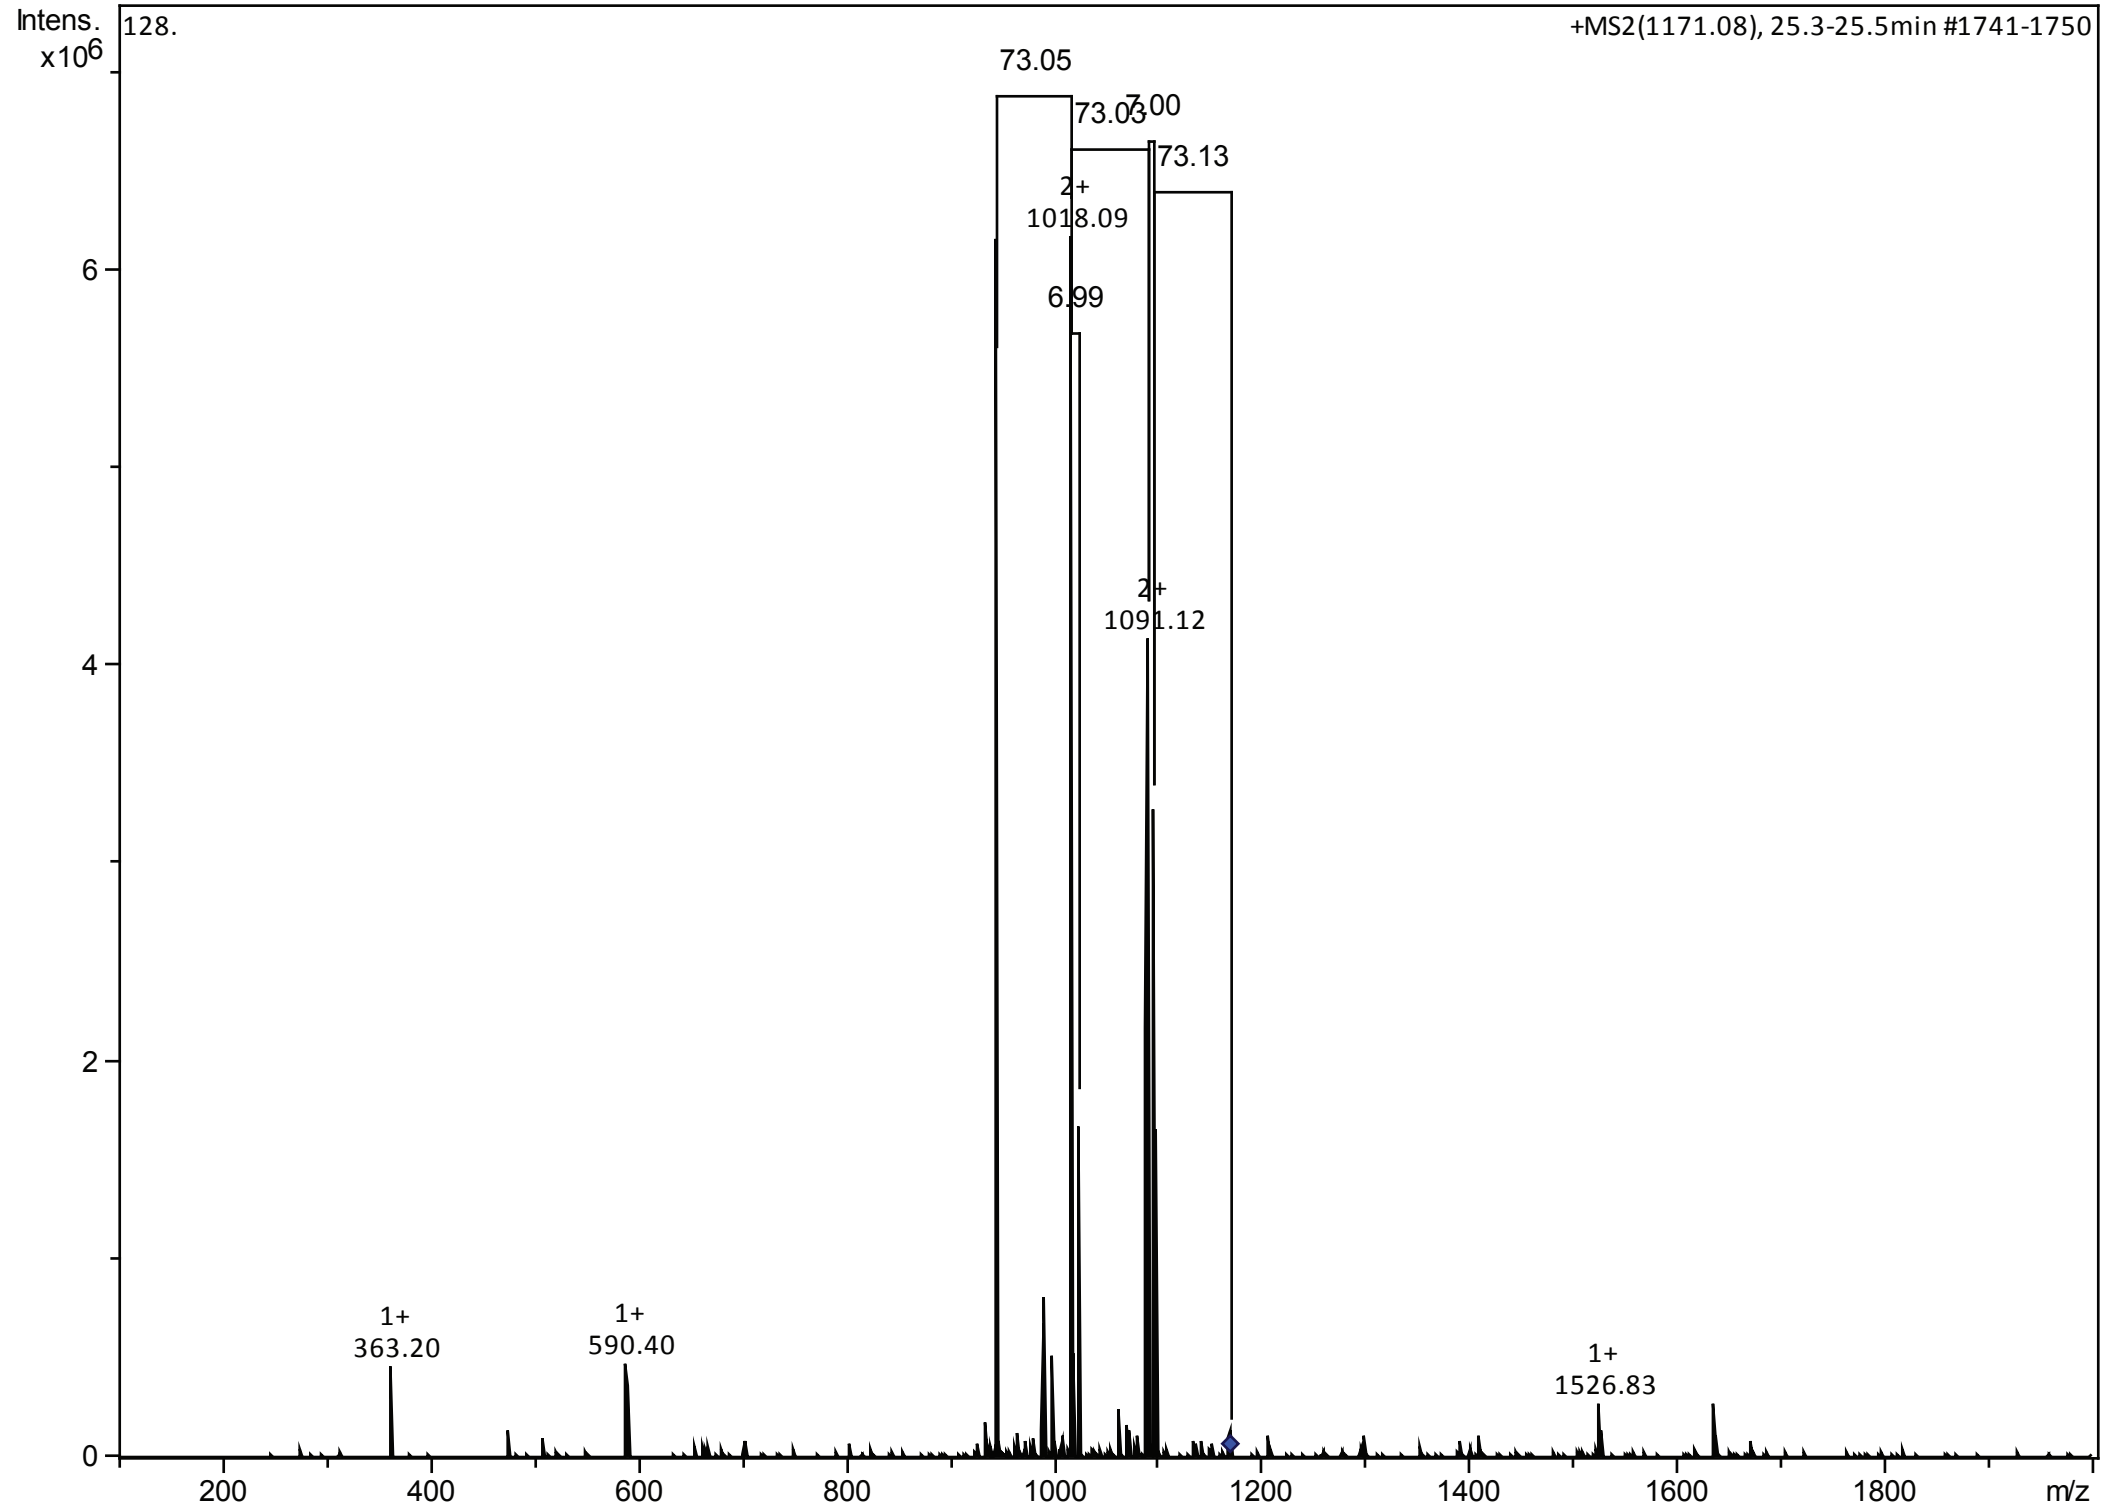

Y  
CID

Y  
ETD

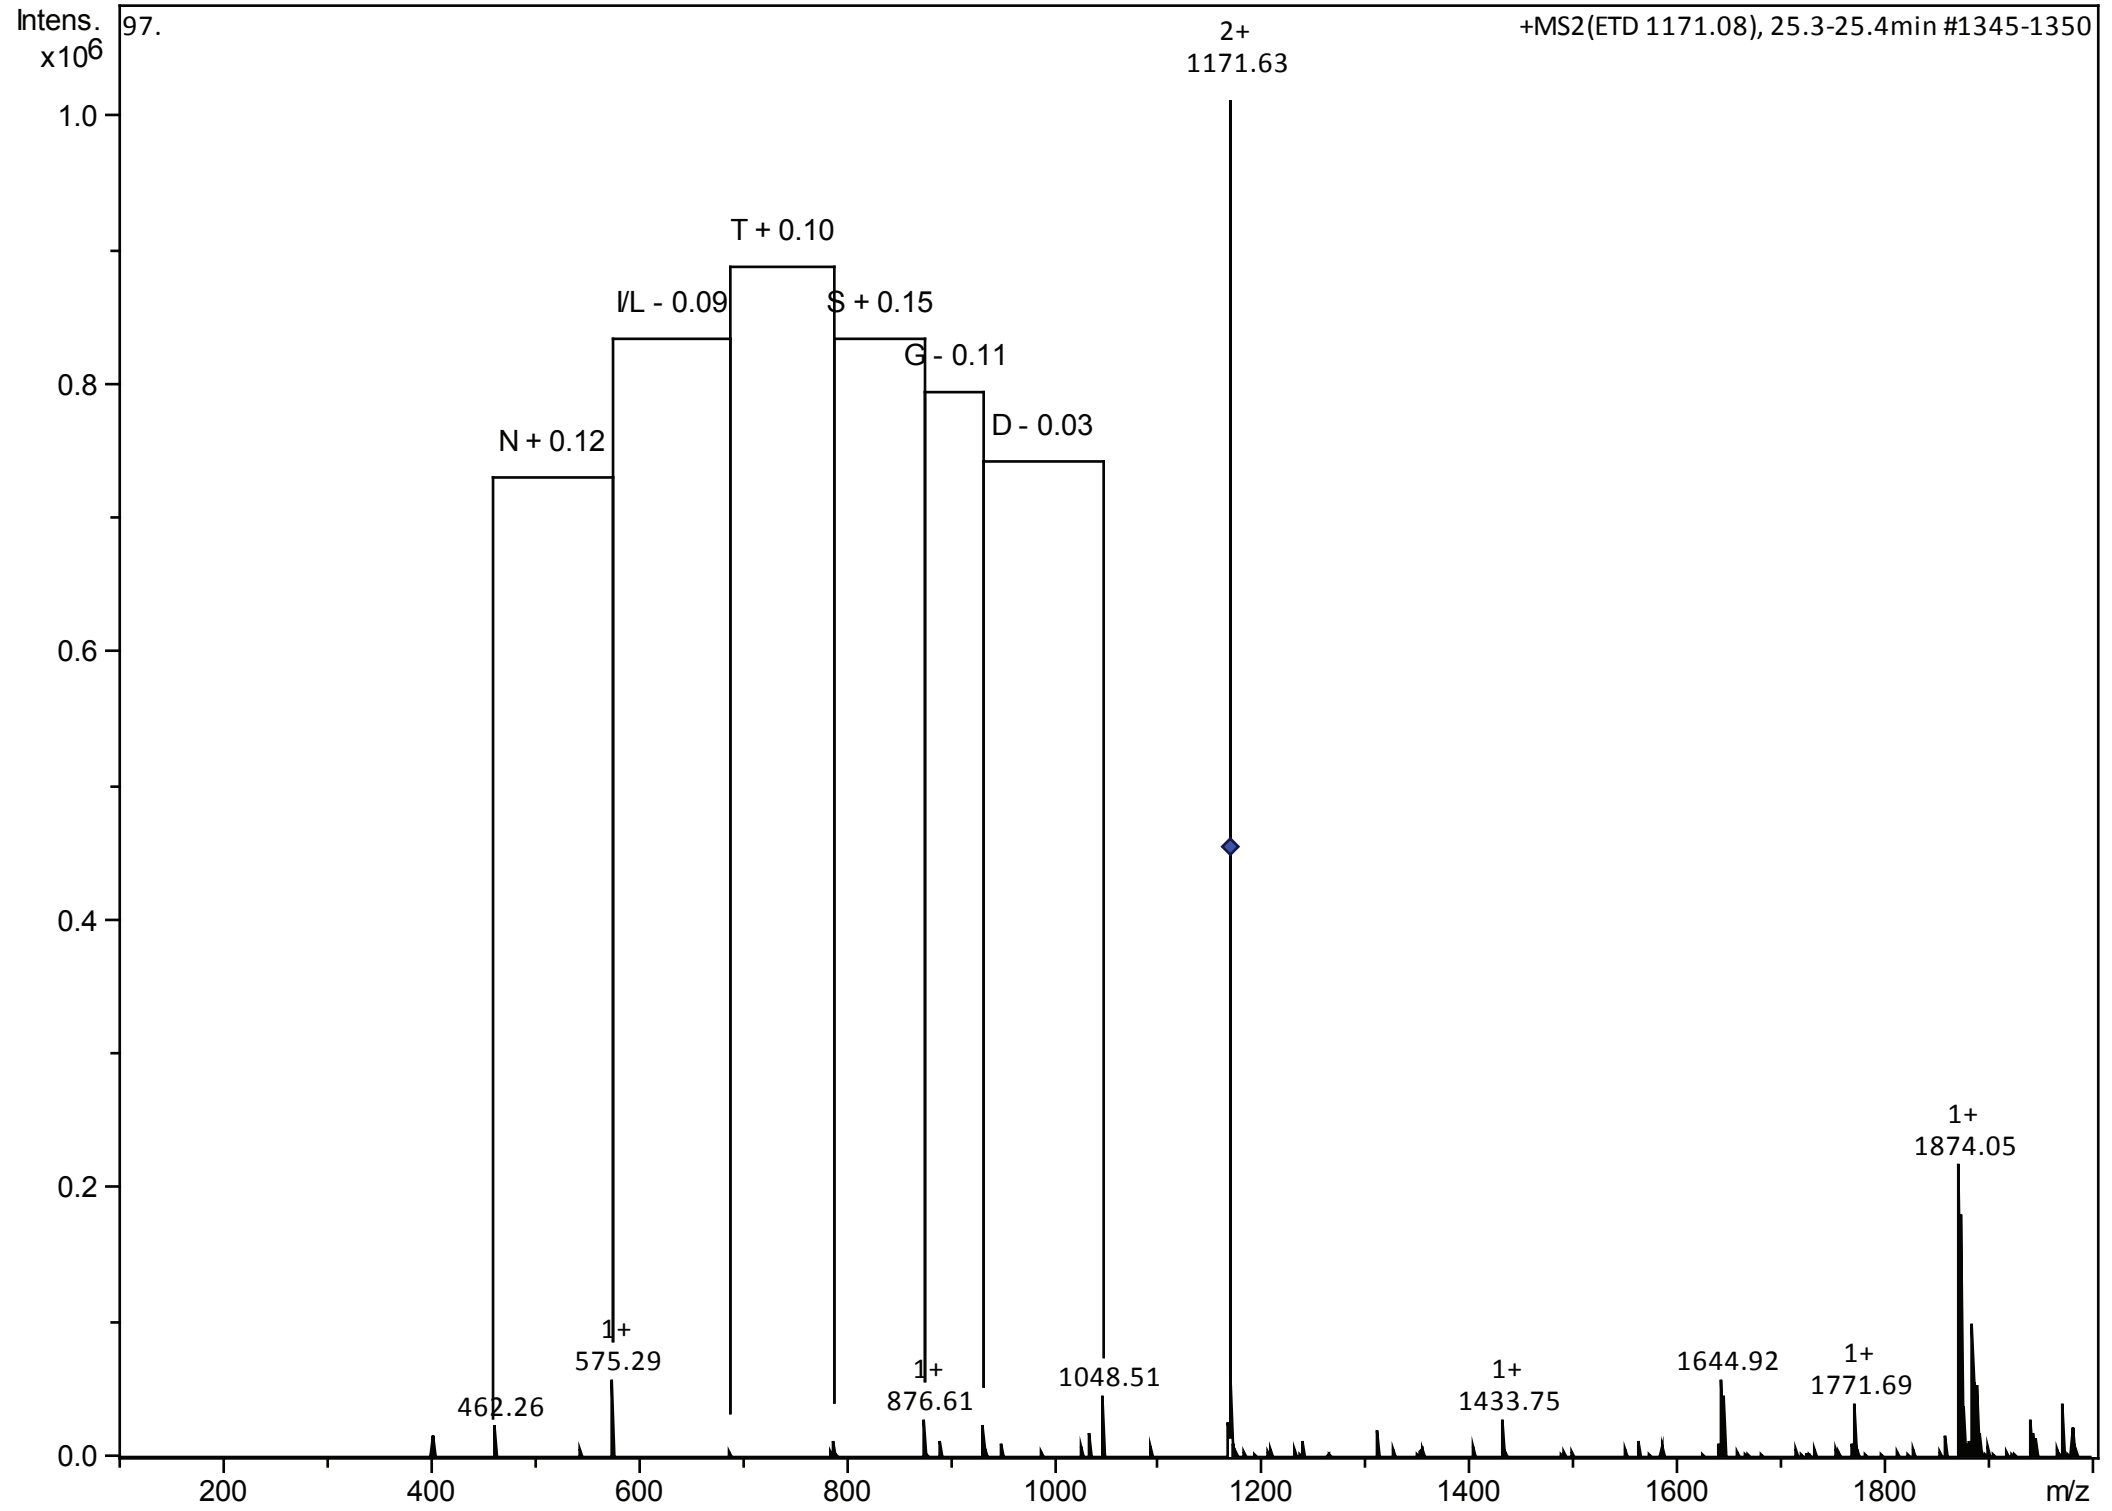

Supplement: supp_RA117.000394_133056_1_supp_40223_p15m5m.pdf [file supp_RA117.000394_133056_1_supp_40223_p15m5m.pdf]
